# Supplementary material for: The Mass-Longevity Triangle: Pareto Optimality and the Geometry of Life-History Trait Space
Source: PubMed Central journal article supplement (PMC4605829; doi:10.1371/journal.pcbi.1004524), 2015-10-14

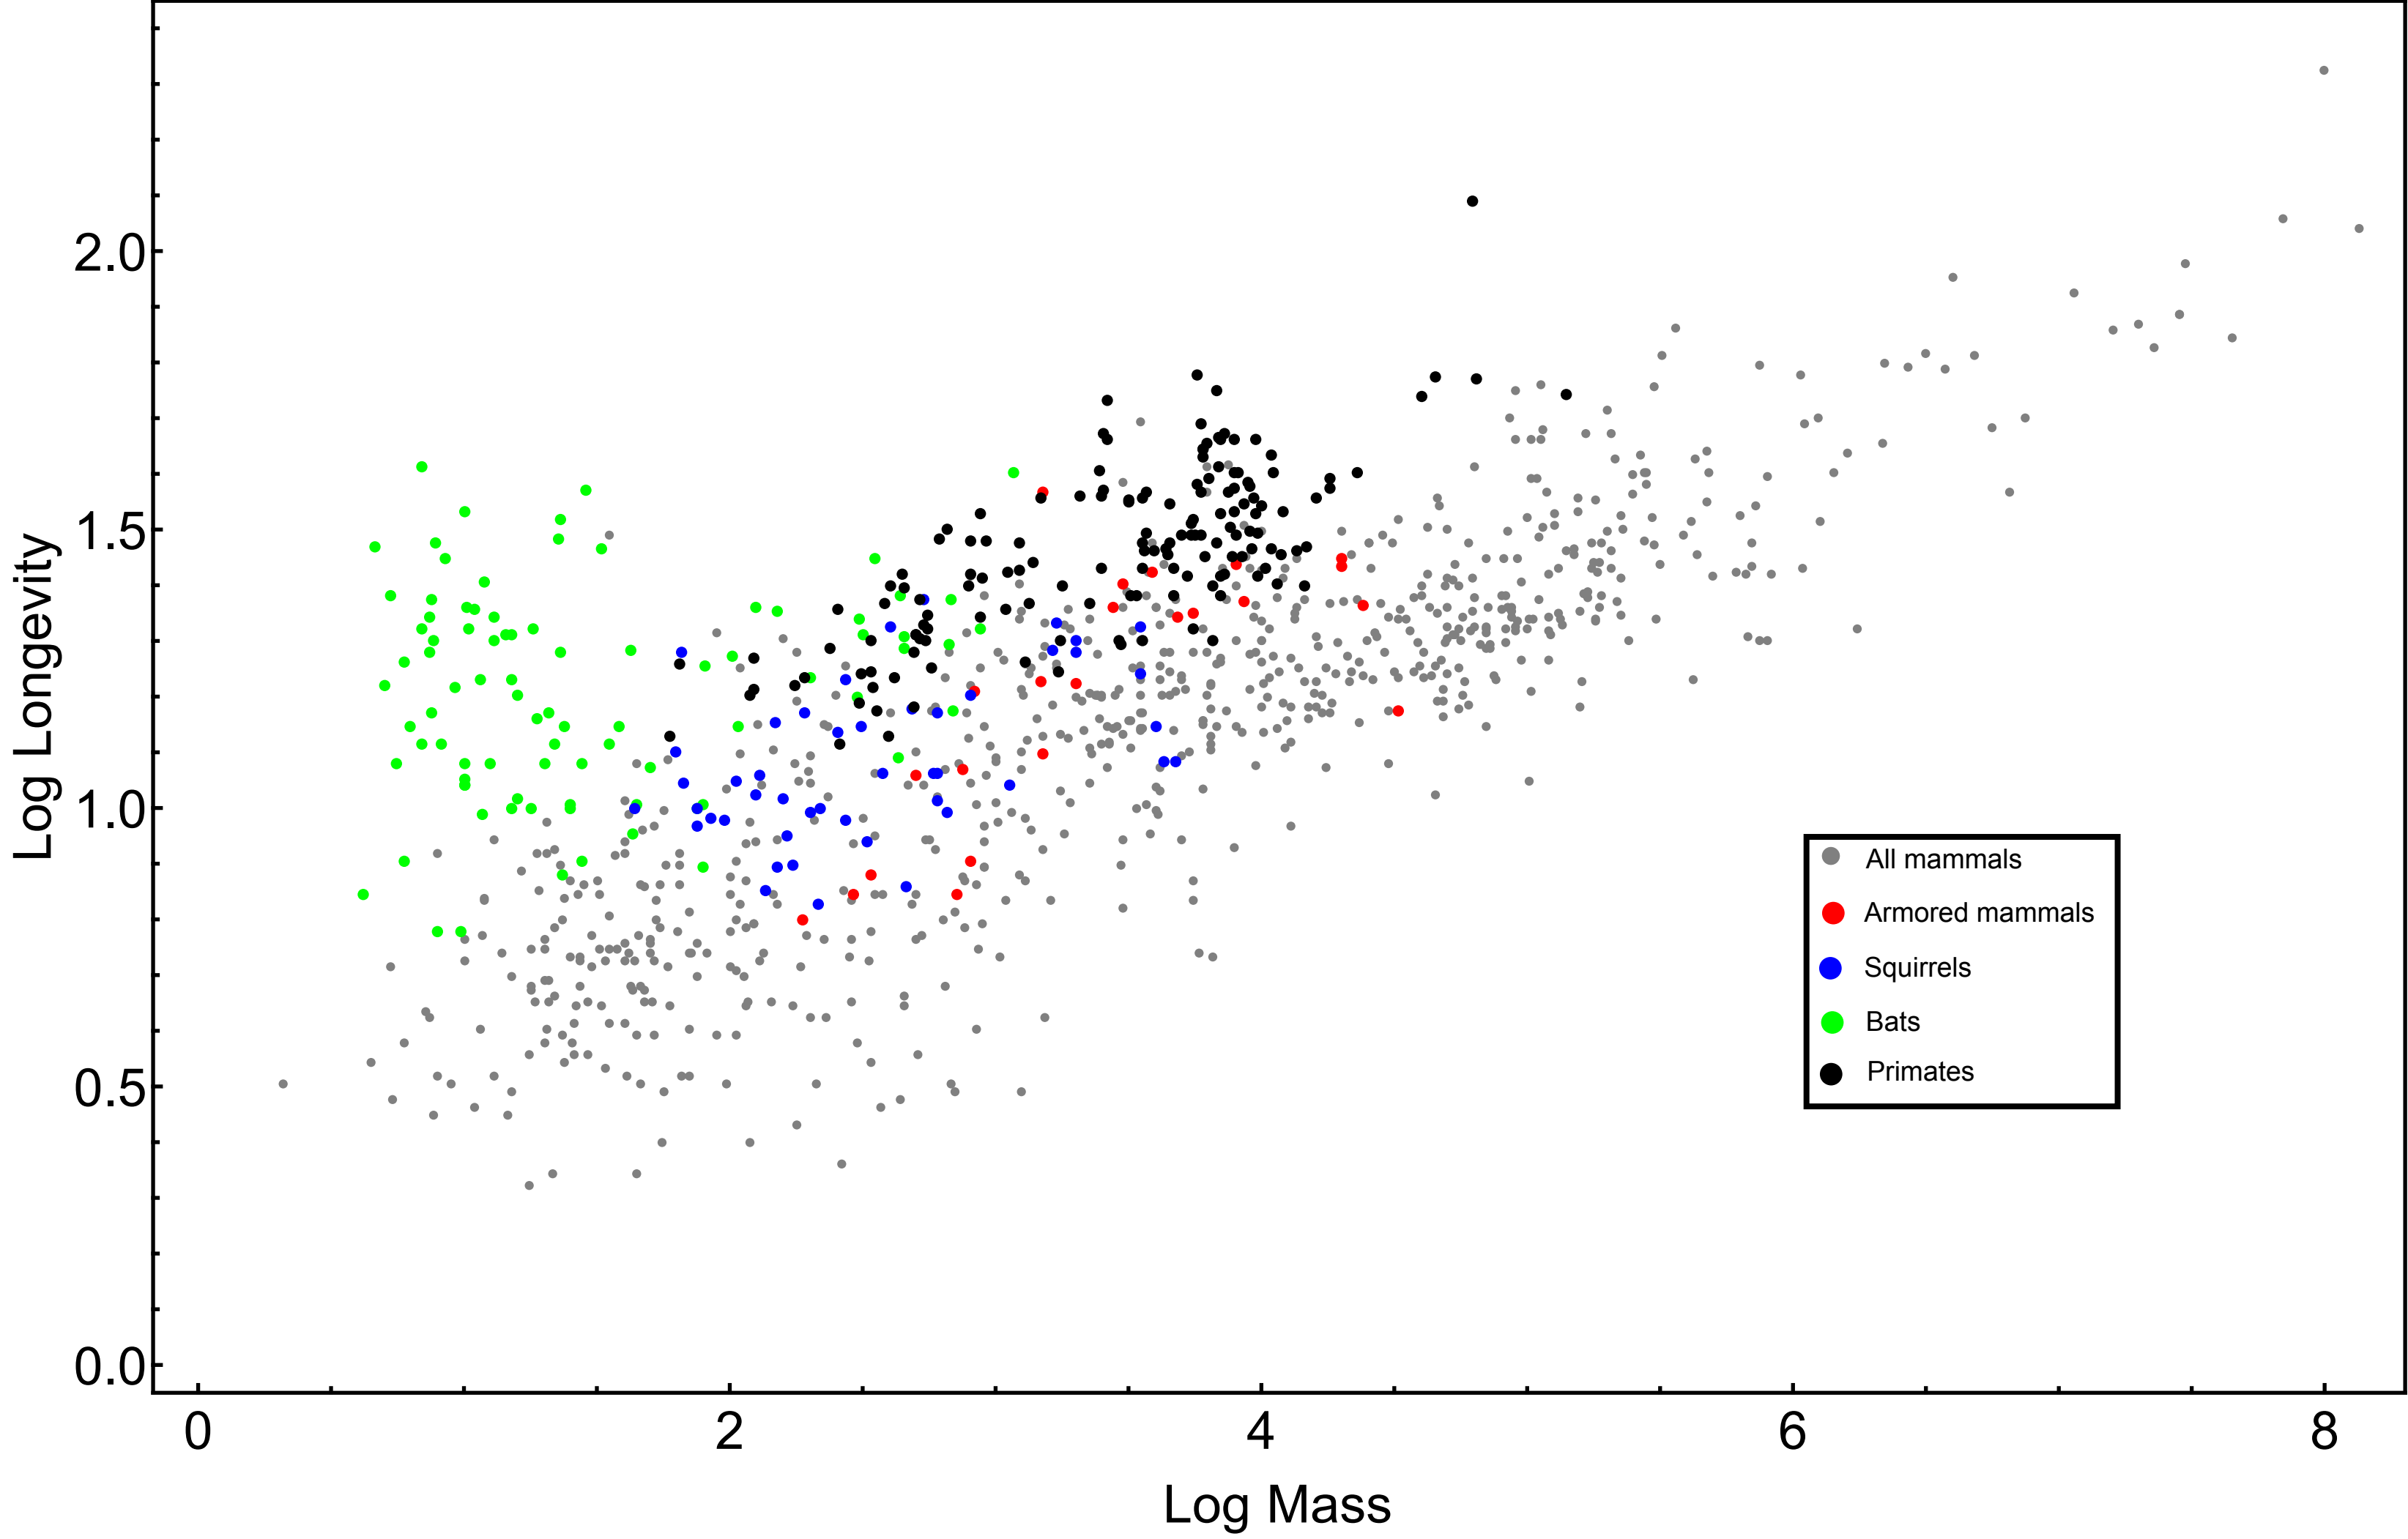

Supplement: pcbi.1004524.s001.pdf [file pcbi.1004524.s001.pdf]
