# Supplementary material for: The Mass-Longevity Triangle: Pareto Optimality and the Geometry of Life-History Trait Space
Source: PubMed Central journal article supplement (PMC4605829; doi:10.1371/journal.pcbi.1004524), 2015-10-14

**a.** Order distribution within Classes

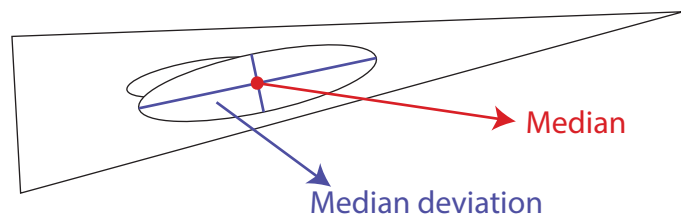

Family distribution within Orders

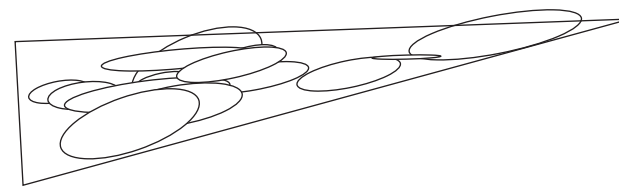

Genus distribution within Families

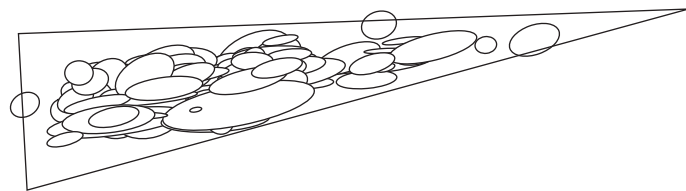

Species distribution within Genera

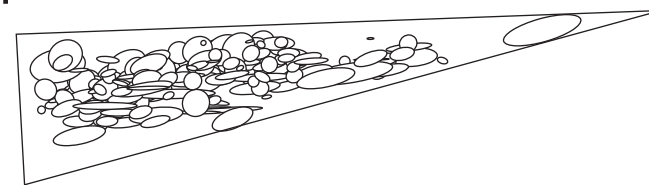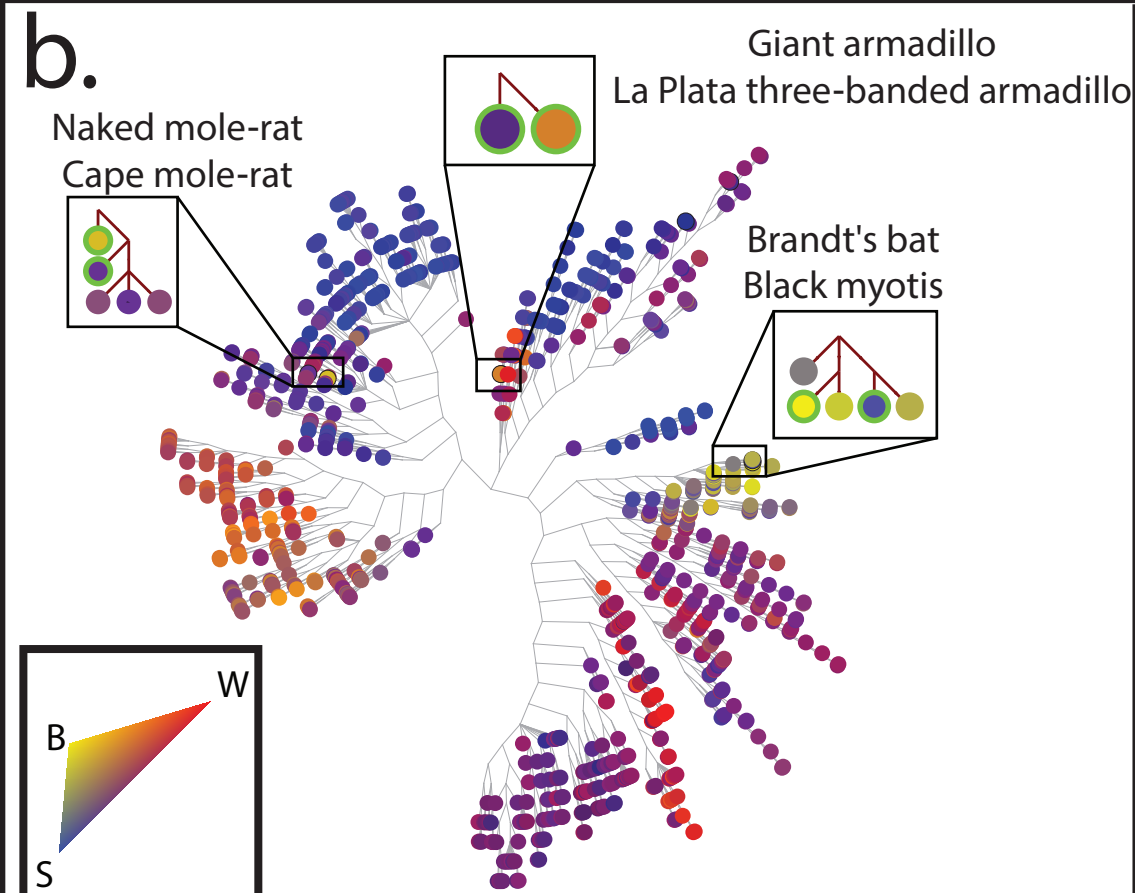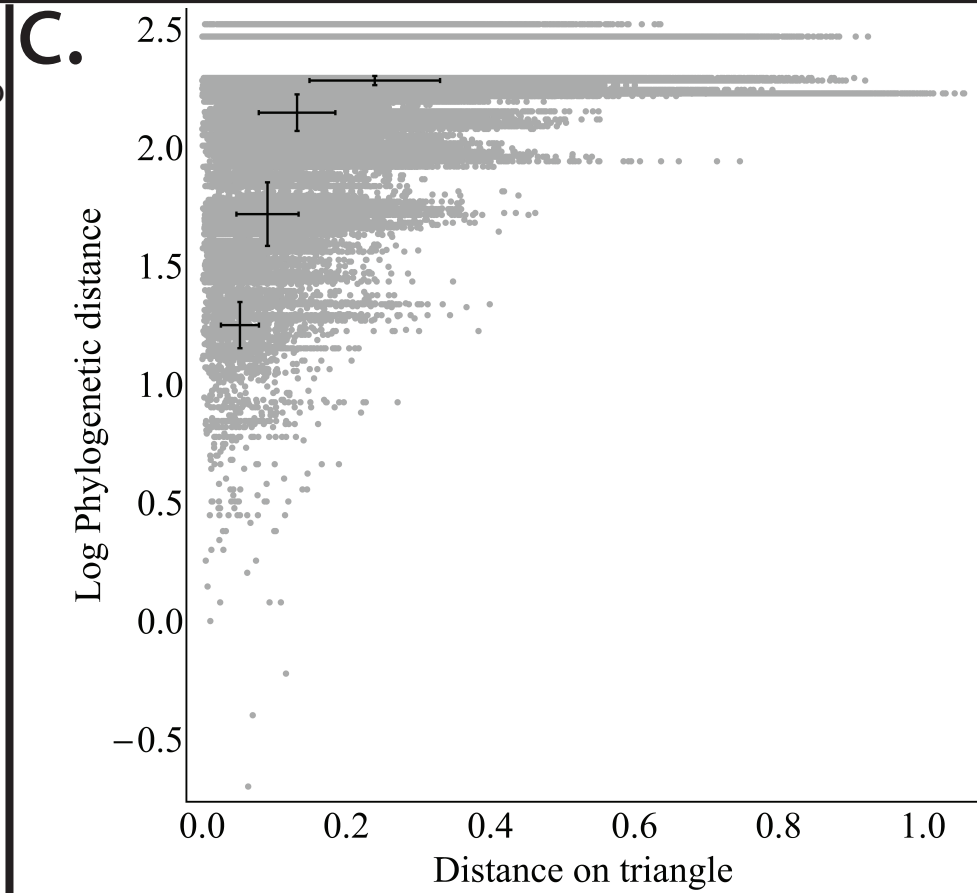

Supplement: pcbi.1004524.s002.pdf [file pcbi.1004524.s002.pdf]
