# Supplementary material for: The Mass-Longevity Triangle: Pareto Optimality and the Geometry of Life-History Trait Space
Source: PLoS Comput Biol. 2015 Oct 14;11(10):e1004524. doi: 10.1371/journal.pcbi.1004524 (PMC4605829; doi:10.1371/journal.pcbi.1004524)
Supplement: S1 Table — The dataset we used [43], the first 6 columns represent the taxonomy and name of the species. The next 13 columns depicts the 13 life history traits we used in our analysis, the next 3 columns show the weights of each archetype for each data-point on the mass-longevity triangle, and the last 4 columns show the weights of each archetype for each data-point on the tetrahedron. (XLS) [file pcbi.1004524.s006.xls]

## Sheet: Sheet1
																				Coordinates on triangle			Coordinates on tetrahedron
Class	Order	Family	Genus	Species	Common name	Female maturity (days)	Male maturity (days)	Gestation/Incubation (days)	Weaning (days)	Litter/Clutch size	Litters/Clutches per year	Inter-litter/Interbirth interval	Birth weight (g)	Weaning weight (g)	Adult weight (g)	Maximum longevity (yrs)		Metabolic rate (W)	Temperature (K)	q1 - W	q2 - B	q3 - S	q1 - W	q2 - B	q3 - S	q4 - X
Aves	Accipitriformes	Accipitridae	Accipiter	cooperii	Cooper's hawk	730	730	24		4	1		28		526.64	20.3				0.219139	0.473277	0.307584
Aves	Accipitriformes	Accipitridae	Accipiter	gentilis	Northern goshawk	365	730	33		3	1				1044.2	22				0.248058	0.450743	0.301199
Aves	Accipitriformes	Accipitridae	Accipiter	nisus	Sparrowhawk	365	365								237.5	20.2	0.9516	135		0.184438	0.519396	0.296166
Aves	Accipitriformes	Accipitridae	Accipiter	striatus	Sharp-shinned hawk	365	365	34		4	1				135	19.9				0.159959	0.549538	0.290503
Aves	Accipitriformes	Accipitridae	Aegypius	monachus	Eurasian black vulture										9625	39				0.338189	0.447587	0.214224
Aves	Accipitriformes	Accipitridae	Aquila	adalberti	Spanish imperial eagle										3000	44.5				0.285734	0.54635	0.167916
Aves	Accipitriformes	Accipitridae	Aquila	audax	Wedge-tailed eagle										3466	40				0.293306	0.513846	0.192848
Aves	Accipitriformes	Accipitridae	Aquila	chrysaetos	Golden eagle	1460	1460	40		2	1		110.6		4800	48	4.9929	3000		0.305347	0.535478	0.159174
Aves	Accipitriformes	Accipitridae	Aquila	fasciata	Bonelli's eagle										2000	20				0.277561	0.390796	0.331643
Aves	Accipitriformes	Accipitridae	Aquila	heliaca	Eastern imperical eagle										3262	56				0.286651	0.593004	0.120345
Aves	Accipitriformes	Accipitridae	Aquila	nipalensis	Steppe eagle										2745.5	41				0.28284	0.533211	0.183948
Aves	Accipitriformes	Accipitridae	Aquila	pomarina	Lesser spotted eagle										1370	26.1				0.257876	0.473015	0.269109
Aves	Accipitriformes	Accipitridae	Aquila	rapax	Tawny eagle										1996.1	40.3				0.269131	0.548249	0.18262
Aves	Accipitriformes	Accipitridae	Butastur	indicus	Gray-faced buzzard										415	8.5				0.219108	0.291907	0.488986
Aves	Accipitriformes	Accipitridae	Buteo	buteo	Buzzard	730	730								1012	28.8				0.243483	0.513084	0.243432
Aves	Accipitriformes	Accipitridae	Buteo	jamaicensis	Red-tailed hawk	730	730	31		3	1		57.6		1362	30.7				0.255687	0.509816	0.234497
Aves	Accipitriformes	Accipitridae	Buteo	lagopus	Rough-legged hawk	730	730	29		5	1		41.62		980.64	18.8				0.247189	0.419168	0.333643
Aves	Accipitriformes	Accipitridae	Buteo	lineatus	Red-shouldered hawk	365	365	33		3.5	1		35		607	22.4	2.11	658		0.224165	0.486961	0.288874
Aves	Accipitriformes	Accipitridae	Buteo	platypterus	Broad-winged hawk	365	365	25		2.5	1		28		454	18.3				0.213896	0.458787	0.327317
Aves	Accipitriformes	Accipitridae	Buteo	regalis	Ferruginous hawk	730	730	32		3	1		51.6		1500	23.7				0.262982	0.445976	0.291042
Aves	Accipitriformes	Accipitridae	Buteo	solitarius	Hawaiian hawk			38		1			35		505	17				0.21942	0.435925	0.344655
Aves	Accipitriformes	Accipitridae	Buteo	swainsoni	Swainson's hawk	730	730	31		3	1		39.4		980.64	24.9				0.243842	0.482274	0.273883
Aves	Accipitriformes	Accipitridae	Buteogallus	anthracinus	Common black hawk	730	730	38		1.5	1				837	13.5				0.24422	0.354191	0.401589
Aves	Accipitriformes	Accipitridae	Circaetus	gallicus	Short-toed eagle	1095	1095								1699.5	17.3				0.272181	0.367884	0.359935
Aves	Accipitriformes	Accipitridae	Circus	aeruginosus	Swamp harrier	730	730								711.5	20.1				0.232389	0.453211	0.3144
Aves	Accipitriformes	Accipitridae	Circus	cyaneus	Northern harrier	365	365	31		4.4	1		23.8		392	17.1				0.208294	0.452264	0.339441
Aves	Accipitriformes	Accipitridae	Circus	macrourus	Pallid harrier										388.5	13.5				0.210718	0.399711	0.389571
Aves	Accipitriformes	Accipitridae	Circus	pygargus	Montagu's harrier	730	730								315.5	16.3				0.199389	0.45438	0.346231
Aves	Accipitriformes	Accipitridae	Elanus	caeruleus	Black-shouldered kite										260.5	6				0.20293	0.241305	0.555765
Aves	Accipitriformes	Accipitridae	Elanus	leucurus	White-tailed kite			30		4.1	1.5		17.4		280	6				0.206081	0.237024	0.556895
Aves	Accipitriformes	Accipitridae	Geranoaetus	melanoleucus	Chilean eagle										2447.5	42	5.1887	2860		0.277538	0.545437	0.177025
Aves	Accipitriformes	Accipitridae	Gypaetus	barbatus	Bearded vulture										5070	40				0.309907	0.491289	0.198803
Aves	Accipitriformes	Accipitridae	Gypohierax	angolensis	Sea eagle										1600	27.1				0.264202	0.472254	0.263543
Aves	Accipitriformes	Accipitridae	Gyps	africanus	White-backed vulture										5433	19.7				0.321361	0.328135	0.350504
Aves	Accipitriformes	Accipitridae	Gyps	fulvus	Eurasian griffon	1460	1460								7436	41.4				0.326215	0.476301	0.197484
Aves	Accipitriformes	Accipitridae	Haliaeetus	albicilla	White-tailed sea-eagle	1460	1460	41		2					6696.5	42				0.321471	0.485744	0.192784
Aves	Accipitriformes	Accipitridae	Haliaeetus	leucocephalus	Bald eagle	1460	1460	35		2	1				3175	48				0.287307	0.55999	0.152703
Aves	Accipitriformes	Accipitridae	Harpia	harpyja	Harpy eagle										4800	16.8				0.31785	0.299721	0.382429
Aves	Accipitriformes	Accipitridae	Hieraaetus	morphnoides	Little eagle										791	10.3				0.244975	0.296788	0.458238
Aves	Accipitriformes	Accipitridae	Ictinia	mississippiensis	Mississippi kite	365	365	31		2	1		17		266	11.2				0.196408	0.380232	0.42336
Aves	Accipitriformes	Accipitridae	Kaupifalco	monogrammicus	Lizard buzzard										280.5	8.6				0.201871	0.317764	0.480365
Aves	Accipitriformes	Accipitridae	Lophoictinia	isura	Square-tailed kite										585.5	17				0.225876	0.427153	0.34697
Aves	Accipitriformes	Accipitridae	Milvus	migrans	Black kite	1095	1095								1000	24				0.245134	0.472848	0.282018
Aves	Accipitriformes	Accipitridae	Milvus	milvus	Red kite	1095	1095								1080	38				0.243021	0.57148	0.185499
Aves	Accipitriformes	Accipitridae	Neophron	percnopterus	Egyptian vulture										2082	37				0.271988	0.526565	0.201447
Aves	Accipitriformes	Accipitridae	Parabuteo	unicinctus	Harris' hawk	365	365	34		3	2				994.26	25				0.244397	0.482357	0.273247
Aves	Accipitriformes	Accipitridae	Pernis	apivorus	Western honey-buzzard	1095	1095								758	29	2.36428	652		0.230786	0.531778	0.237436
Aves	Accipitriformes	Accipitridae	Pithecophaga	jefferyi	Philippine eagle	1825	2555	63		1					6500	41				0.320458	0.482099	0.197443
Aves	Accipitriformes	Accipitridae	Rostrhamus	sociabilis	Snail kite	365	365	30		3	2		29.3		352.5	17				0.203728	0.457246	0.339026
Aves	Accipitriformes	Accipitridae	Terathopius	ecaudatus	Bateleur										2200	55				0.269673	0.612318	0.118009
Aves	Accipitriformes	Cathartidae	Cathartes	aura	Turkey vulture	4015	4015	39		2	1		60		2200	20.8				0.281254	0.393951	0.324795
Aves	Accipitriformes	Cathartidae	Coragyps	atratus	Black vulture	2920	2920	35		2	1		70		2270	25.5				0.280195	0.437844	0.281961
Aves	Accipitriformes	Cathartidae	Gymnogyps	californianus	California condor	2190	2190	57		1	2		185.3		11175	45				0.343002	0.470868	0.18613
Aves	Accipitriformes	Cathartidae	Sarcoramphus	papa	King vulture			57							3405	40				0.292531	0.514899	0.19257
Aves	Accipitriformes	Cathartidae	Vultur	gryphus	Andean condor	2555	2555	56		1					10500	79				0.33358	0.600947	0.0654733
Aves	Accipitriformes	Pandionidae	Pandion	haliaetus	Osprey	1095	1095	38		3	1		50.3		1362	32				0.255193	0.519129	0.225677
Aves	Anseriformes	Anatidae	Aix	galericulata	Mandarin duck			29		10.5					570	10.4				0.230558	0.31839	0.451053
Aves	Anseriformes	Anatidae	Aix	sponsa	Wood duck	365	365	31		12	2		23.7		452.8	22.5	2.247	448		0.21132	0.505343	0.283337
Aves	Anseriformes	Anatidae	Alopochen	aegyptiaca	Egyptian goose	730	730	29		7					1900	25.5				0.272428	0.448396	0.279175
Aves	Anseriformes	Anatidae	Anas	acuta	Northern pintail	240	240	22		7.5	1		26		721	27.4				0.229278	0.522001	0.248721
Aves	Anseriformes	Anatidae	Anas	americana	American wigeon	365	365	23		9	1		24		793.8	21.3				0.236476	0.459741	0.303783
Aves	Anseriformes	Anatidae	Anas	clypeata	Northern shoveler	240	240	23		11	1		23		613	22.6	3.9209	554		0.224489	0.488374	0.287137
Aves	Anseriformes	Anatidae	Anas	crecca	Green-winged teal	180	180	22		10	1		15		343.8	27.1	1.68388	250		0.197084	0.563449	0.239467
Aves	Anseriformes	Anatidae	Anas	cyanoptera	Cinnamon teal	365	365	23		10	1.5		18.2		411	12.9				0.213717	0.386162	0.400121
Aves	Anseriformes	Anatidae	Anas	discors	Blue-winged teal	240	240	24		10	1		18.3		420	23.2				0.207673	0.516683	0.275645
Aves	Anseriformes	Anatidae	Anas	fulvigula	Mottled duck	365	365	26		10	1		32.9		950	20				0.245067	0.434946	0.319987
Aves	Anseriformes	Anatidae	Anas	laysanensis	Laysan teal	365	365	28		3.8	1		26		500	12				0.223134	0.358296	0.418569
Aves	Anseriformes	Anatidae	Anas	penelope	Eurasian wigeon	365	365	24		8					660	35.2	2.8538	723		0.222436	0.583499	0.194065
Aves	Anseriformes	Anatidae	Anas	platyrhynchos	Mallard	365	365	26		9	1		32.8		1048.1	29.1	4.068	1020		0.24489	0.513333	0.241778
Aves	Anseriformes	Anatidae	Anas	querquedula	Garganey	365	365								326	14.7				0.202048	0.429237	0.368715
Aves	Anseriformes	Anatidae	Anas	rubripes	American black duck	365	365	28		9	1		32		998.7	26.6	3.6076	904		0.243852	0.496024	0.260124
Aves	Anseriformes	Anatidae	Anas	strepera	Gadwall	240	240	26		10	1		35.6		791	28				0.233064	0.52137	0.245566
Aves	Anseriformes	Anatidae	Anser	albifrons	Greater white-fronted goose	1095	1095	27		5	1		90.3		2681	47				0.280176	0.565292	0.154532
Aves	Anseriformes	Anatidae	Anser	anser	Greylag goose	1095	1095								3308.5	31				0.294312	0.459363	0.246325
Aves	Anseriformes	Anatidae	Anser	brachyrhynchus	Pink-footed goose	1095	1095								2645	40.9				0.281241	0.534875	0.183884
Aves	Anseriformes	Anatidae	Anser	fabalis	Bean goose	1095	1095	28		4					3348	25.6				0.297109	0.415678	0.287213
Aves	Anseriformes	Anatidae	Aythya	affinis	Lesser scaup	365	365	24		10	1		30.8		787	18.3				0.237908	0.426161	0.335931
Aves	Anseriformes	Anatidae	Aythya	americana	Redhead	365	365	26		13	1		37.6		1077.3	22.6				0.2491	0.454935	0.295966
Aves	Anseriformes	Anatidae	Aythya	collaris	Ring-necked duck	365	365	27		9	1		29.3		737	20.4				0.233749	0.454449	0.311801
Aves	Anseriformes	Anatidae	Aythya	ferina	Common pochard	365	365								823	23.2				0.237035	0.476787	0.286178
Aves	Anseriformes	Anatidae	Aythya	fuligula	Tufted duck	365	365								701.5	45.2				0.22212	0.636036	0.141844
Aves	Anseriformes	Anatidae	Aythya	marila	Greater scaup	365	365	26		9	1		46.3		928.5	22.1				0.242878	0.458726	0.298396
Aves	Anseriformes	Anatidae	Aythya	valisineria	Canvasback	240	240	24		9	1		44.7		1208.8	29.5				0.250954	0.507938	0.241108
Aves	Anseriformes	Anatidae	Branta	bernicla	Brent goose	730	730	24		4	1		43.6		1163.2	28.8				0.249561	0.504826	0.245613
Aves	Anseriformes	Anatidae	Branta	canadensis	Canada goose	730	730	26		5	1		85.5		3200	42				0.28924	0.529538	0.181222
Aves	Anseriformes	Anatidae	Branta	hutchinsii	Cackling goose										1940.1	18.3				0.277291	0.372651	0.350058
Aves	Anseriformes	Anatidae	Branta	leucopsis	Barnacle goose	730	730								1687	28.2				0.26604	0.478049	0.255911
Aves	Anseriformes	Anatidae	Branta	sandvicensis	Hawaiian goose	912	730	30		4	1		90.8		2150	42				0.271881	0.553123	0.174996
Aves	Anseriformes	Anatidae	Bucephala	albeola	Bufflehead	730	730	30		8	1		23.8		400	18.7				0.208111	0.471153	0.320736
Aves	Anseriformes	Anatidae	Bucephala	clangula	Common goldeneye	730	730	30		10	1		38.1		895.86	18.4				0.243498	0.419701	0.3368
Aves	Anseriformes	Anatidae	Bucephala	islandica	Barrow's goldeneye	730	730	29		11	1				957.15	18				0.246649	0.410841	0.342511
Aves	Anseriformes	Anatidae	Cereopsis	novaehollandiae	Cape barren goose										3980	28.1				0.303547	0.426347	0.270106
Aves	Anseriformes	Anatidae	Chen	caerulescens	Snow goose or blue goose	730	730	24		4	1		95		2806.65	27.5				0.288558	0.442215	0.269227
Aves	Anseriformes	Anatidae	Chen	canagica	Emperor goose	365	365	24		4.9	1		81.8		2148	12				0.28676	0.271847	0.441393
Aves	Anseriformes	Anatidae	Chen	rossii	Ross's goose	570	570	21		4	1		65		1715	22.5				0.269447	0.426364	0.304189
Aves	Anseriformes	Anatidae	Clangula	hyemalis	Oldsquaw	730	730	24		7	1		25		872	22.7				0.239819	0.468465	0.291716
Aves	Anseriformes	Anatidae	Cygnus	buccinator	Trumpeter swan	730	730	35		5	1		220		13000	32.5				0.35348	0.388817	0.257703
Aves	Anseriformes	Anatidae	Cygnus	columbianus	Tundra swan	730	730	31		4	1		179		6350	24.1				0.325767	0.364157	0.310076
Aves	Anseriformes	Anatidae	Cygnus	cygnus	Whooper swan	1460	1460								9350	26.5				0.341525	0.362529	0.295945
Aves	Anseriformes	Anatidae	Cygnus	olor	Mute swan	1095	1095	36		5.3	1		225		8300	70				0.324758	0.587729	0.0875137
Aves	Anseriformes	Anatidae	Dendrocygna	autumnalis	Black-bellied whistling duck	365	365	27		14	1		30.8		828	8.2				0.249686	0.242873	0.507442
Aves	Anseriformes	Anatidae	Dendrocygna	bicolor	Fulvous whistling duck	365	365	25		13	1		27		737.1	11.2				0.240897	0.319785	0.439318
Aves	Anseriformes	Anatidae	Dendrocygna	viduata	White-faced whistling duck			27		8					610	12				0.231814	0.346503	0.421683
Aves	Anseriformes	Anatidae	Histrionicus	histrionicus	Harlequin duck	365	365	28		6	1		32.9		561.25	14.6				0.225842	0.395484	0.378673
Aves	Anseriformes	Anatidae	Lophodytes	cucullatus	Hooded merganser	730	730	31		11	1		31		634.375	15.7				0.230323	0.404533	0.365143
Aves	Anseriformes	Anatidae	Melanitta	fusca	White-winged scoter	730	730	28		11	1		54.5		1360.8	21.4				0.259947	0.428827	0.311226
Aves	Anseriformes	Anatidae	Melanitta	nigra	Black scoter	730	730	29		9	1		43.2		1052.2	16.8				0.251603	0.389732	0.358665
Aves	Anseriformes	Anatidae	Melanitta	perspicillata	Surf scoter	730	730								1097.5	9.5				0.260232	0.259208	0.480559
Aves	Anseriformes	Anatidae	Mergellus	albellus	Smew										610	10				0.233985	0.30556	0.460455
Aves	Anseriformes	Anatidae	Mergus	merganser	Common merganser	730	730	30		10	1		46.2		1445	14.8				0.266959	0.342454	0.390587
Aves	Anseriformes	Anatidae	Mergus	serrator	Red-breasted merganser	730	730	32		10	1				1020.6	21.3				0.247446	0.444837	0.307718
Aves	Anseriformes	Anatidae	Netta	rufina	Red-crested pochard	365	365								1118	8.8				0.261952	0.240922	0.497126
Aves	Anseriformes	Anatidae	Oxyura	australis	Australian blue-billed duck										798	16				0.240114	0.395175	0.364711
Aves	Anseriformes	Anatidae	Oxyura	jamaicensis	Ruddy duck	365	365	23		8	1		43		542	13.6				0.225164	0.381621	0.393215
Aves	Anseriformes	Anatidae	Plectropterus	gambensis	Spur-winged goose										3869	11.3				0.313162	0.22345	0.463388
Aves	Anseriformes	Anatidae	Polysticta	stelleri	Stellar's eider	730	730	26		8	1				907.2	23				0.24139	0.469066	0.289544
Aves	Anseriformes	Anatidae	Somateria	fischeri	Spectacled eider	730	730			4.7					1558	18				0.267914	0.381947	0.350139
Aves	Anseriformes	Anatidae	Somateria	mollissima	Common eider	730	730	28		4	1		76.4		2130	37.8				0.272728	0.530017	0.197255
Aves	Anseriformes	Anatidae	Somateria	spectabilis	King eider	730	730	23		5	1				1617	18.9				0.268956	0.390699	0.340345
Aves	Anseriformes	Anatidae	Tadorna	tadorna	Common shelduck	730	730								1152	24.8				0.25092	0.47182	0.277261
Aves	Apodiformes	Apodidae	Aeronautes	saxatalis	White-throated swift			24		4	1				31	10				0.103935	0.482261	0.413805
Aves	Apodiformes	Apodidae	Apus	apus	Swift	730	730								37.6	21.1	0.4372	44.9		0.103467	0.638496	0.258037
Aves	Apodiformes	Apodidae	Apus	melba	Alpine swift	730	730								102.7	26				0.144839	0.6258	0.229361
Aves	Apodiformes	Apodidae	Chaetura	pelagica	Chimney swift	365	365	20		4.5	1		1.25		22.8	15				0.0856957	0.591536	0.322768
Aves	Apodiformes	Apodidae	Cypseloides	niger	Black swift	365	365	24		1	1		3.3		45	16.1				0.11453	0.567106	0.318364
Aves	Apodiformes	Trochilidae	Amazilia	yucatanensis	Buff-bellied hummingbird										3.9	11.2				0.0121006	0.630653	0.357247
Aves	Apodiformes	Trochilidae	Archilochus	alexandri	Black-chinned hummingbird	365	365			2					3	11.2				0.000648683	0.646213	0.353139
Aves	Apodiformes	Trochilidae	Archilochus	colubris	Ruby-throated hummingbird	365	365	13		2	2		0.62		3.1	9.1	0.07832	3.2		0.0045528	0.597639	0.397808
Aves	Apodiformes	Trochilidae	Calothorax	lucifer	Lucifer hummingbird			15		2	2				3.3	4.1				0.016777	0.414885	0.568338
Aves	Apodiformes	Trochilidae	Calypte	anna	Anna's hummingbird	365	365	16		2	2				4.4	8.5	0.1175	4.8		0.020651	0.561552	0.417797
Aves	Apodiformes	Trochilidae	Calypte	costae	Costa's hummingbird			16		2	1				3.1	6				0.00951327	0.504103	0.486384
Aves	Apodiformes	Trochilidae	Cynanthus	latirostris	Broad-billed hummingbird	365	365	17		2					3.3	8.8				0.00768097	0.586403	0.405916
Aves	Apodiformes	Trochilidae	Eugenes	fulgens	Magnificent hummingbird	365	365	14		2					8.1	11				0.0442175	0.58326	0.372522
Aves	Apodiformes	Trochilidae	Lampornis	clemenciae	Blue-throated hummingbird	365		18		2	2				7.6	12				0.0404001	0.606579	0.353021
Aves	Apodiformes	Trochilidae	Lamprolaima	rhami	Garnet-throated hummingbird										7.8	8				0.0463628	0.513984	0.439653
Aves	Apodiformes	Trochilidae	Selasphorus	platycercus	Broad-tailed hummingbird	365	365	16		2	2		0.4		4.2	14				0.0126778	0.676369	0.310953
Aves	Apodiformes	Trochilidae	Selasphorus	rufus	Rufous hummingbird	365	365	16		2	1				3.5	8.9	0.06853	3.8		0.0101147	0.585451	0.404435
Aves	Apodiformes	Trochilidae	Stellula	calliope	Calliope hummingbird	365	365	15		2					2.6	7	0.06853	3		-1.11583e-17	0.549151	0.450849
Aves	Apterygiformes	Apterygidae	Apteryx	australis	Brown kiwi			75		1			325		2600	35	4.029	2380		0.282348	0.500909	0.216744
Aves	Bucerotiformes	Bucerotidae	Buceros	bicornis	Great Indian hornbill										2798.5	33.4				0.286116	0.486037	0.227846
Aves	Bucerotiformes	Bucerotidae	Bycanistes	subcylindricus	Grey-cheeked hornbill										1250	31.8				0.251523	0.52281	0.225667
Aves	Bucerotiformes	Bucerotidae	Ceratogymna	atrata	African black-wattled hornbill										1203.5	19.3				0.255815	0.412918	0.331267
Aves	Bucerotiformes	Bucorvidae	Bucorvus	leadbeateri	Southern ground hornbill										3767.5	70				0.290282	0.634571	0.0751468
Aves	Bucerotiformes	Upupidae	Upupa	epops	Eurasian hoopoe	365	365								67.1	11.1				0.136397	0.459901	0.403702
Aves	Caprimulgiformes	Caprimulgidae	Caprimulgus	carolinensis	Chuck-will's-widow			20		2.5	1				115	14.8				0.156487	0.492554	0.350959
Aves	Caprimulgiformes	Caprimulgidae	Caprimulgus	europaeus	Eurasian nightjar	365	365								67	11.9				0.135503	0.475618	0.388879
Aves	Caprimulgiformes	Caprimulgidae	Caprimulgus	ruficollis	Red-necked nightjar										68.5	13.2				0.135235	0.497587	0.367178
Aves	Caprimulgiformes	Caprimulgidae	Caprimulgus	vociferus	Whip-poor-will			19		2	2		5.4		54	15				0.123331	0.540401	0.336269
Aves	Caprimulgiformes	Caprimulgidae	Chordeiles	minor	Common nighthawk			19		2	1		5.95		79.3	10	0.4421	72		0.144932	0.426557	0.428511
Aves	Casuariiformes	Casuariidae	Casuarius	bennetti	Westermann's cassowary										35000	26				0.399368	0.279969	0.320663
Aves	Casuariiformes	Casuariidae	Casuarius	casuarius	Southern cassowary										44000	30				0.407652	0.298533	0.293815
Aves	Casuariiformes	Casuariidae	Casuarius	unappendiculatus	Blyth's cassowary										47300	22				0.414502	0.224593	0.360904
Aves	Casuariiformes	Dromaiidae	Dromaius	novaehollandiae	Emu										38925	16.6				0.409351	0.172903	0.417747
Aves	Charadriiformes	Alcidae	Aethia	cristatella	Crested auklet	1095	1095	34		1	1				289	10.8				0.200461	0.367146	0.432392
Aves	Charadriiformes	Alcidae	Aethia	pusilla	Least auklet	1095	1095	30		1	1				96	8.1				0.155783	0.367902	0.476315
Aves	Charadriiformes	Alcidae	Aethia	pygmaea	Whiskered auklet		1095			1					120	15				0.158185	0.493044	0.348771
Aves	Charadriiformes	Alcidae	Alca	torda	Razorbill	1460	1460	36		1	1		63.8		726	42				0.224493	0.61751	0.157997
Aves	Charadriiformes	Alcidae	Brachyramphus	marmoratus	Marbled murrelet	730	730								222	10				0.189866	0.365505	0.444629
Aves	Charadriiformes	Alcidae	Cepphus	columba	Pigeon guillemot	1095	1095	31		2			43.7		483.8	15.2				0.218881	0.413335	0.367783
Aves	Charadriiformes	Alcidae	Cepphus	grylle	Black guillemot	1095	1095	25		2	1		33		427.5	29.9				0.205424	0.572607	0.221969
Aves	Charadriiformes	Alcidae	Cerorhinca	monocerata	Rhinoceros auklet	1095	1095	45		1	1		54.5		544.1	28.2				0.216648	0.545159	0.238194
Aves	Charadriiformes	Alcidae	Fratercula	arctica	Atlantic puffin	1460	1460	42		1	1		39.7		490.5	40.8				0.207722	0.634256	0.158022
Aves	Charadriiformes	Alcidae	Ptychoramphus	aleuticus	Cassin's auklet	730	730								184	16.2				0.175926	0.484977	0.339097
Aves	Charadriiformes	Alcidae	Synthliboramphus	hypoleucus	Xantus' murrelet	730	730	34		2	1		24.8		167	15				0.172611	0.473443	0.353946
Aves	Charadriiformes	Alcidae	Uria	aalge	Common murre	1825	1825	31		1	1				992	42.8	6.8224	956		0.237894	0.603234	0.158872
Aves	Charadriiformes	Alcidae	Uria	lomvia	Thick-billed murre	1862	2081	33		1	1		70.4		964	29	6.8224	989		0.24128	0.51752	0.2412
Aves	Charadriiformes	Burhinidae	Burhinus	oedicnemus	Eurasian thick-knee										459	17.9				0.214637	0.453174	0.332189
Aves	Charadriiformes	Charadriidae	Charadrius	alexandrinus	Snowy plover	310	331	24		3			6		37	19				0.104013	0.615908	0.280079
Aves	Charadriiformes	Charadriidae	Charadrius	dubius	Little ringed plover	730	730								38.7	13	0.416	36		0.110494	0.528022	0.361484
Aves	Charadriiformes	Charadriidae	Charadrius	hiaticula	Common ringed plover	365	365								64	20.8				0.126853	0.603737	0.26941
Aves	Charadriiformes	Charadriidae	Charadrius	melodus	Piping plover	365	365	28		4	1		6.75		49	14				0.119911	0.530669	0.349419
Aves	Charadriiformes	Charadriidae	Charadrius	montanus	Mountain plover	365	365			6					100	10				0.155055	0.412802	0.432142
Aves	Charadriiformes	Charadriidae	Charadrius	morinellus	Eurasian dotterel										108.5	11.8				0.156645	0.445133	0.398221
Aves	Charadriiformes	Charadriidae	Charadrius	semipalmatus	Semipalmated plover	912	912	24		4	1		6.52		52	9.2				0.127505	0.432859	0.439635
Aves	Charadriiformes	Charadriidae	Charadrius	vociferus	Killdeer	365	365	24		4			9.85		88	10.9				0.148449	0.439736	0.411814
Aves	Charadriiformes	Charadriidae	Pluvialis	apricaria	European golden-plover and greater golden-plover	730	730								214	12.8				0.185324	0.423119	0.391557
Aves	Charadriiformes	Charadriidae	Pluvialis	dominica	American golden plover	365	365	26		4			19.5		118	13				0.159155	0.461905	0.37894
Aves	Charadriiformes	Charadriidae	Pluvialis	fulva	Pacific golden-plover	365	365								135	21.3				0.15915	0.564806	0.276045
Aves	Charadriiformes	Charadriidae	Pluvialis	squatarola	Black-bellied plover	730	730	27		4	1		21.4		224	25.6				0.179062	0.57607	0.244868
Aves	Charadriiformes	Charadriidae	Vanellus	armatus	Blacksmith lapwing			29							156	18.6				0.167075	0.525792	0.307134
Aves	Charadriiformes	Charadriidae	Vanellus	spinosus	Spur-winged lapwing										188	17				0.17629	0.494527	0.329183
Aves	Charadriiformes	Charadriidae	Vanellus	vanellus	Lapwing	730	730	24		4					218.5	24.5				0.1785	0.567681	0.253819
Aves	Charadriiformes	Haematopodidae	Haematopus	bachmani	Black oystercatcher	1825	1825	26		2	1		34		670	16				0.232483	0.405544	0.361974
Aves	Charadriiformes	Haematopodidae	Haematopus	ostralegus	European oystercatcher	1095	1095								480	43.3	2.91	449		0.206069	0.648894	0.145036
Aves	Charadriiformes	Haematopodidae	Haematopus	palliatus	American oystercatcher	1095	1095	27		2	1		37.3		565	17				0.224321	0.429267	0.346412
Aves	Charadriiformes	Laridae	Anous	minutus	Black noddy	730	730	34		1	1		16.8		110.4	27.1				0.147501	0.630818	0.221681
Aves	Charadriiformes	Laridae	Anous	stolidus	Noddy tern	1095	1460	35		1	1		24.8		178	26.2	0.788095	138.7		0.168753	0.594904	0.236343
Aves	Charadriiformes	Laridae	Chlidonias	niger	Black tern	730	730	21		3			7.25		60	21				0.123922	0.609713	0.266364
Aves	Charadriiformes	Laridae	Chroicocephalus	genei	Slender-billed gull	730	730								281	31.7				0.186412	0.61062	0.202967
Aves	Charadriiformes	Laridae	Chroicocephalus	ridibundus	Black-headed gull	730	730	22		3					306	32.9				0.18969	0.61391	0.1964
Aves	Charadriiformes	Laridae	Gelochelidon	nilotica	Gull-billed tern	1825	1825	22		3	1		21.4		221	16				0.184071	0.471321	0.344608
Aves	Charadriiformes	Laridae	Gygis	alba	Fairy tern	1764	1764	36		1			13		98.1	35.9	0.82236	98.1		0.138996	0.700973	0.160031
Aves	Charadriiformes	Laridae	Hydrocoloeus	minutus	Little gull	730	730	21		3					119	20.9				0.153869	0.56803	0.278101
Aves	Charadriiformes	Laridae	Hydroprogne	caspia	Caspian tern	1095	1095	21		2	1		48.5		644	30				0.223269	0.549057	0.227674
Aves	Charadriiformes	Laridae	Ichthyaetus	audouinii	Audouin's gull	1095	1095								535	20.9				0.219479	0.478884	0.301636
Aves	Charadriiformes	Laridae	Ichthyaetus	melanocephalus	Mediterranean gull	1095	1095								256	22.1				0.186641	0.535135	0.278223
Aves	Charadriiformes	Laridae	Larosterna	inca	Inca tern			28							219	26				0.177892	0.58089	0.241218
Aves	Charadriiformes	Laridae	Larus	argentatus	Herring gull	1825	1460	26		3	1		67.5		1094	49	4.817	1000		0.240555	0.627809	0.131636
Aves	Charadriiformes	Laridae	Larus	cachinnans	Caspian gull	1460	1460								1117.2	31.9				0.246583	0.530177	0.223241
Aves	Charadriiformes	Laridae	Larus	californicus	California gull	1095	1095	25		3	1		50		691	30				0.226343	0.544879	0.228777
Aves	Charadriiformes	Laridae	Larus	canus	Mew gull	1095	730	23		3	1		40		430.6	33.7	2.257	431		0.204314	0.599046	0.19664
Aves	Charadriiformes	Laridae	Larus	delawarensis	Ring-billed gull	730	730	21		3	1		36.3		518.5	31.8	2.91742	439		0.213113	0.574997	0.211889
Aves	Charadriiformes	Laridae	Larus	fuscus	Lesser black-backed gull	1460	1460								766.2	34.9				0.229051	0.572728	0.198222
Aves	Charadriiformes	Laridae	Larus	glaucescens	Glaucous-winged gull			27		3			70.65		908	32				0.237495	0.543176	0.219329
Aves	Charadriiformes	Laridae	Larus	glaucoides	Iceland gull	1460	1460	25		2.39	1				945.5	33				0.238895	0.547686	0.213418
Aves	Charadriiformes	Laridae	Larus	heermanni	Heermann's gull										500	24				0.214879	0.513956	0.271165
Aves	Charadriiformes	Laridae	Larus	hyperboreus	Glaucous gull	1460	1460	27		3	1		72.6		1210	21.1				0.254988	0.432623	0.312389
Aves	Charadriiformes	Laridae	Larus	marinus	Great black-backed gull	1825	1825	27		3			85		1658.5	29.2				0.264881	0.486885	0.248234
Aves	Charadriiformes	Laridae	Larus	occidentalis	Western gull	1825	1460	27		3	1		67.5		931.5	33.9	3.43629	761		0.237924	0.554613	0.207463
Aves	Charadriiformes	Laridae	Larus	pacificus	Pacific gull										1313.5	14.5				0.263038	0.343514	0.393448
Aves	Charadriiformes	Laridae	Leucophaeus	atricilla	Laughing gull			24		3			30.1		275.6	22				0.189916	0.529742	0.280343
Aves	Charadriiformes	Laridae	Onychoprion	anaethetus	Bridled tern										133.3	17.9				0.160668	0.526503	0.312829
Aves	Charadriiformes	Laridae	Onychoprion	fuscatus	Sooty tern	1460	1460	28		1	1		23.4		148	35.8				0.156979	0.675958	0.167063
Aves	Charadriiformes	Laridae	Onychoprion	lunatus	Gray-backed tern	1825	1825			1			18.5		131.7	25.8				0.155787	0.609316	0.234897
Aves	Charadriiformes	Laridae	Pagophila	eburnea	Ivory gull	730	730	25		2	1				550	23.9				0.219089	0.507366	0.273545
Aves	Charadriiformes	Laridae	Procelsterna	cerulea	Blue-gray noddy										53	15				0.122515	0.541509	0.335976
Aves	Charadriiformes	Laridae	Rissa	brevirostris	Red-legged kittiwake										377	27				0.201152	0.557152	0.241697
Aves	Charadriiformes	Laridae	Rissa	tridactyla	Black-legged kittiwake	1460	1460	27		2	1		36		317	28.5				0.192941	0.579574	0.227485
Aves	Charadriiformes	Laridae	Rynchops	niger	Black skimmer	730	730	23		4	1				315	20.2				0.196765	0.502648	0.300587
Aves	Charadriiformes	Laridae	Sterna	dougallii	Roseate tern	1095	1095	23		2	1		14.8		112	25.7				0.148761	0.618053	0.233186
Aves	Charadriiformes	Laridae	Sterna	forsteri	Forster's tern	730	730	23		3	1		13.78		158	15.8				0.169574	0.488398	0.342029
Aves	Charadriiformes	Laridae	Sterna	hirundo	Common tern	1095	1095	24		2.5	1		1.25		120	33				0.148795	0.670107	0.181098
Aves	Charadriiformes	Laridae	Sterna	paradisaea	Arctic tern	1095	1095	21		2	1		13.1		100	34				0.140481	0.687624	0.171895
Aves	Charadriiformes	Laridae	Sternula	albifrons	Little tern	730	730	21		2					31	23.9				0.093558	0.677926	0.228516
Aves	Charadriiformes	Laridae	Sternula	antillarum	Least tern	1095	1095	21		2			7		40	24.1				0.104585	0.664681	0.230735
Aves	Charadriiformes	Laridae	Thalasseus	elegans	Elegant tern	1095	1095	26		1	1		26.4		251	20.9				0.186445	0.523768	0.289787
Aves	Charadriiformes	Laridae	Thalasseus	maximus	Royal tern	1095	1095	28		2	1		56		373	28.6				0.2	0.570713	0.229287
Aves	Charadriiformes	Laridae	Thalasseus	sandvicensis	Sandwich tern	1095	1095	22		1	1		28		250	30.8				0.181653	0.611085	0.207262
Aves	Charadriiformes	Recurvirostridae	Himantopus	himantopus	Black-winged stilt										161	10.2				0.175607	0.389006	0.435388
Aves	Charadriiformes	Recurvirostridae	Himantopus	mexicanus	Black-necked (Hawaiian) stilt	365	365	25		4	1		13.6		186	19.1				0.174436	0.521317	0.304246
Aves	Charadriiformes	Recurvirostridae	Recurvirostra	avosetta	Pied avocet	730	730								304	27.8				0.19141	0.576473	0.232117
Aves	Charadriiformes	Scolopacidae	Actitis	hypoleucos	Common sandpiper	365	365								48	14.5				0.118593	0.539773	0.341634
Aves	Charadriiformes	Scolopacidae	Actitis	macularius	Spotted sandpiper	365	365	20		4	1		6.04		34	12				0.105795	0.517726	0.376479
Aves	Charadriiformes	Scolopacidae	Arenaria	interpres	Ruddy turnstone	730	730	22		4	1		11.42		136	22.3	0.92	90		0.158925	0.574671	0.266404
Aves	Charadriiformes	Scolopacidae	Bartramia	longicauda	Upland sandpiper			22		4	1		18		141	8.9				0.171441	0.366255	0.462304
Aves	Charadriiformes	Scolopacidae	Calidris	alba	Sanderling	730	730	27		4	1.5		7.3		50	18.6				0.11741	0.593272	0.289318
Aves	Charadriiformes	Scolopacidae	Calidris	alpina	Dunlin	730	730	21		4	1		9		52.5	28.8				0.114332	0.688563	0.197104
Aves	Charadriiformes	Scolopacidae	Calidris	canutus	Red knot	1095	1095	22		4	1				135	27.3				0.156194	0.620539	0.223267
Aves	Charadriiformes	Scolopacidae	Calidris	ferruginea	Curlew sandpiper	1095	1095								58.1	19.7				0.123279	0.597271	0.27945
Aves	Charadriiformes	Scolopacidae	Calidris	himantopus	Stilt sandpiper	730	730								57.3	11.1				0.129506	0.469264	0.40123
Aves	Charadriiformes	Scolopacidae	Calidris	maritima	Purple sandpiper	1095	1095	22		4	1		9.1		65.2	20.8				0.127664	0.602635	0.269701
Aves	Charadriiformes	Scolopacidae	Calidris	mauri	Western sandpiper	730	730	21		4	1		5		26.19	9.2				0.0975681	0.473535	0.428897
Aves	Charadriiformes	Scolopacidae	Calidris	minuta	Little stint	730	730								21.1	14.7				0.0825541	0.591594	0.325852
Aves	Charadriiformes	Scolopacidae	Calidris	minutilla	Least sandpiper	365	365	20		4	1		4.06		26	16				0.0906598	0.59824	0.3111
Aves	Charadriiformes	Scolopacidae	Calidris	pusilla	Semipalmated sandpiper	365	365	20		4	1		4.4		27	19.3				0.0900739	0.638112	0.271814
Aves	Charadriiformes	Scolopacidae	Calidris	temminckii	Temminck's stint										23	12.9				0.0878732	0.557148	0.354979
Aves	Charadriiformes	Scolopacidae	Gallinago	delicata	Wilson's snipe										122	9.2				0.164728	0.382284	0.452988
Aves	Charadriiformes	Scolopacidae	Gallinago	gallinago	Common snipe	365	365	19		4			11		131.6	18.2				0.159909	0.530997	0.309094
Aves	Charadriiformes	Scolopacidae	Limicola	falcinellus	Broad-billed sandpiper										37.1	6.8				0.116368	0.385	0.498632
Aves	Charadriiformes	Scolopacidae	Limnodromus	griseus	Short-billed dowitcher	365	365	21		4	1		11.8		105	13.3				0.153789	0.473951	0.37226
Aves	Charadriiformes	Scolopacidae	Limnodromus	scolopaceus	Long-billed dowitcher			20		4	1				130	13.2				0.163201	0.45959	0.377209
Aves	Charadriiformes	Scolopacidae	Limosa	fedoa	Marbled godwit	1095	1095	24		4	1		37		336	13.7				0.204206	0.411623	0.384171
Aves	Charadriiformes	Scolopacidae	Limosa	lapponica	Bar-tailed godwit	730	730	21		4	1		28		322	34				0.191523	0.618273	0.190204
Aves	Charadriiformes	Scolopacidae	Limosa	limosa	Black-tailed godwit	730	730								294	23.6				0.1919	0.541675	0.266425
Aves	Charadriiformes	Scolopacidae	Lymnocryptes	minimus	Jack snipe	365	365								50.2	12.3				0.122509	0.500162	0.377329
Aves	Charadriiformes	Scolopacidae	Numenius	arquata	Eurasian curlew	730	730								728	31.8				0.227926	0.554871	0.217203
Aves	Charadriiformes	Scolopacidae	Numenius	phaeopus	Whimbrel	730	730	22		4	1		35		365.7	24.2				0.201127	0.53437	0.264503
Aves	Charadriiformes	Scolopacidae	Numenius	tahitiensis	Bristle-thighed curlew	1065	1065			4	1		37.6		408.6	23.8				0.206167	0.524049	0.269784
Aves	Charadriiformes	Scolopacidae	Phalaropus	lobatus	Red-necked phalarope	365	365								33.8	12.9				0.104676	0.534317	0.361007
Aves	Charadriiformes	Scolopacidae	Phalaropus	tricolor	Wilson's phalarope			23		4					57	10				0.13052	0.446139	0.423341
Aves	Charadriiformes	Scolopacidae	Philomachus	pugnax	Ruff	730	730								136	13.9				0.164555	0.468518	0.366927
Aves	Charadriiformes	Scolopacidae	Scolopax	minor	American woodcock	300	300	20		4	1		12.2		197.5	20.9	1.066	156.7		0.175982	0.537984	0.286033
Aves	Charadriiformes	Scolopacidae	Scolopax	rusticola	Eurasian woodcock	365	365								308.3	15.5	2.16	430		0.19898	0.444448	0.356572
Aves	Charadriiformes	Scolopacidae	Tringa	erythropus	Spotted redshank	365	365								158	8.6				0.176818	0.351804	0.471378
Aves	Charadriiformes	Scolopacidae	Tringa	glareola	Wood sandpiper	365	365								62.5	11.6				0.132773	0.474007	0.39322
Aves	Charadriiformes	Scolopacidae	Tringa	nebularia	Common greenshank	365	365								187	24.4				0.171754	0.575995	0.252251
Aves	Charadriiformes	Scolopacidae	Tringa	ochropus	Green sandpiper	365	365								90	11.5				0.148792	0.450437	0.400771
Aves	Charadriiformes	Scolopacidae	Tringa	semipalmata	Willet	730	730	22		4	1		28		270	12.6				0.195657	0.405797	0.398546
Aves	Charadriiformes	Scolopacidae	Tringa	stagnatilis	Marsh sandpiper										77.5	7.1				0.148009	0.351006	0.500985
Aves	Charadriiformes	Scolopacidae	Tringa	totanus	Common redshank	365	365								149	26.9				0.160677	0.611372	0.227951
Aves	Charadriiformes	Scolopacidae	Xenus	cinereus	Terek sandpiper										78.8	16				0.139058	0.532481	0.328461
Aves	Charadriiformes	Stercorariidae	Stercorarius	antarcticus	Brown skua										1687	28.8				0.265789	0.482777	0.251434
Aves	Charadriiformes	Stercorariidae	Stercorarius	longicaudus	Long-tailed jaeger			23		2					298	14				0.198709	0.423606	0.377685
Aves	Charadriiformes	Stercorariidae	Stercorarius	maccormicki	South polar skua										1349	23.5				0.258452	0.450366	0.291183
Aves	Charadriiformes	Stercorariidae	Stercorarius	parasiticus	Parasidic jaeger	1200	1200	26		2			28.5		445.5	31.1				0.206755	0.578998	0.214247
Aves	Charadriiformes	Stercorariidae	Stercorarius	skua	Great skua	2190	2190								1340	34.5				0.253587	0.536988	0.209425
Aves	Ciconiiformes	Ciconiidae	Ciconia	abdimii	Abdim's stork										1398	21.6				0.261013	0.429317	0.30967
Aves	Ciconiiformes	Ciconiidae	Ciconia	boyciana	Oriental white stork										4850.5	48.1				0.305779	0.535325	0.158896
Aves	Ciconiiformes	Ciconiidae	Ciconia	ciconia	European white stork	1460	1460	33		4					3350	39				0.292122	0.510179	0.197699
Aves	Ciconiiformes	Ciconiidae	Ciconia	episcopus	Woolly-necked stork										2061	30.2				0.273964	0.481561	0.244475
Aves	Ciconiiformes	Ciconiidae	Ciconia	maguari	Maguari stork										4000	20.4				0.30758	0.354135	0.338285
Aves	Ciconiiformes	Ciconiidae	Ciconia	nigra	Black stork										2926	31.3				0.288834	0.468812	0.242354
Aves	Ciconiiformes	Ciconiidae	Ephippiorhynchus	asiaticus	Black-necked stork										4100	34				0.302574	0.467386	0.23004
Aves	Ciconiiformes	Ciconiidae	Ephippiorhynchus	senegalensis	Saddle-billed stork										6162.5	30.2				0.321772	0.416604	0.261624
Aves	Ciconiiformes	Ciconiidae	Jabiru	mycteria	Jabiru										5470	27.4				0.317728	0.401823	0.280449
Aves	Ciconiiformes	Ciconiidae	Leptoptilos	crumeniferus	Marabou	1460	1460	30		2					8000	44.7				0.328493	0.489188	0.18232
Aves	Ciconiiformes	Ciconiidae	Leptoptilos	javanicus	Lesser adjutant										5710	31.1				0.318094	0.427721	0.254185
Aves	Ciconiiformes	Ciconiidae	Mycteria	americana	Wood stork	1460	1460	30		3	1		62		2500	27				0.283726	0.444957	0.271317
Aves	Ciconiiformes	Ciconiidae	Mycteria	ibis	Yellow-billed stork										2166.5	19.1				0.281599	0.375714	0.342687
Aves	Ciconiiformes	Ciconiidae	Mycteria	leucocephala	Painted stork										3180	28.6				0.293542	0.443616	0.262841
Aves	Coliiformes	Coliidae	Colius	striatus	Speckled mousebird			14							51	11.5				0.124	0.484122	0.391878
Aves	Columbiformes	Columbidae	Caloenas	nicobarica	Nicobar pigeon			17		1					519	20.5				0.218384	0.476345	0.30527
Aves	Columbiformes	Columbidae	Columba	livia	Rock dove	140	140	18		2	3		15.2		358.7	35				0.195889	0.618381	0.18573
Aves	Columbiformes	Columbidae	Columba	oenas	Stock dove and stock pigeon	365	365								291	12.6				0.198927	0.401355	0.399719
Aves	Columbiformes	Columbidae	Columba	palumbus	Common wood-pigeon	365	365								490	17.7				0.217624	0.446775	0.335601
Aves	Columbiformes	Columbidae	Columbina	inca	Inca dove			14		2	3.5				50	13.3				0.121404	0.517952	0.360644
Aves	Columbiformes	Columbidae	Columbina	passerina	Common ground dove	75	75	13		2	2.5		5		35	7.2				0.113144	0.401291	0.485564
Aves	Columbiformes	Columbidae	Geopelia	striata	Zebra dove										56.6	14				0.126205	0.522118	0.351677
Aves	Columbiformes	Columbidae	Leptotila	verreauxi	White-tipped dove			14		2	1				147.5	8.6	0.8884	131		0.173816	0.355882	0.470302
Aves	Columbiformes	Columbidae	Leucosarcia	melanoleuca	Wonga-wonga pigeon										429	16.3	1.695	445		0.212802	0.436155	0.351043
Aves	Columbiformes	Columbidae	Patagioenas	fasciata	Band-tailed pigeon	365	365	19		1					315	18.5				0.197812	0.482906	0.319283
Aves	Columbiformes	Columbidae	Patagioenas	leucocephala	White-crowned pigeon	365	365			1					247	14.4				0.190181	0.441064	0.368755
Aves	Columbiformes	Columbidae	Streptopelia	chinensis	Spotted dove			15		2			6.4		159	9.8				0.175537	0.380763	0.443699
Aves	Columbiformes	Columbidae	Streptopelia	decaocto	Eurasian collared-dove	365	365	15		2	4.5				157.4	17.9				0.167922	0.516647	0.315431
Aves	Columbiformes	Columbidae	Streptopelia	turtur	European turtle-dove	365	365								132	13.2	1.138	154		0.163867	0.458684	0.377448
Aves	Columbiformes	Columbidae	Zenaida	asiatica	White-winged dove	365	365	13		2			7.7		140	25				0.158829	0.598618	0.242553
Aves	Columbiformes	Columbidae	Zenaida	macroura	Mourning dove	90	80	14		2	5		5		119	31.3	0.736	123		0.149059	0.658726	0.192215
Aves	Coraciiformes	Alcedinidae	Alcedo	atthis	Common kingfisher	365	365								31.4	21	0.378	34.3		0.0956582	0.648116	0.256226
Aves	Coraciiformes	Alcedinidae	Ceryle	rudis	Pied kingfisher										84.4	3.9				0.158867	0.211405	0.629729
Aves	Coraciiformes	Alcedinidae	Chloroceryle	americana	Green kingfisher					3					34	5				0.116222	0.321123	0.562655
Aves	Coraciiformes	Alcedinidae	Dacelo	novaeguineae	Laughing kookaburra	365	365	25							305	26.8				0.191989	0.568051	0.239959
Aves	Coraciiformes	Alcedinidae	Halcyon	smyrnensis	White-throated kingfisher										91.4	5.5				0.15825	0.28388	0.55787
Aves	Coraciiformes	Coraciidae	Coracias	benghalensis	Indian roller										158	8.9				0.176409	0.359504	0.464086
Aves	Coraciiformes	Coraciidae	Coracias	caudatus	Lilac-breasted roller			21							108	13.7				0.154665	0.478935	0.3664
Aves	Coraciiformes	Coraciidae	Coracias	garrulus	Roller										146	9.2				0.172567	0.371634	0.455799
Aves	Coraciiformes	Meropidae	Merops	apiaster	Bee-eater	365	365								56.6	5.9				0.136496	0.328067	0.535437
Aves	Coraciiformes	Meropidae	Merops	bullockoides	White-fronted bee-eater										34.8	7				0.11323	0.395305	0.491465
Aves	Coraciiformes	Momotidae	Momotus	mexicanus	Russet-crowned motmot										75.7	10.4				0.142437	0.43812	0.419443
Aves	Coraciiformes	Momotidae	Momotus	momota	Blue-crowned motmot			21							133	20.3				0.159071	0.554892	0.286037
Aves	Coraciiformes	Todidae	Todus	mexicanus	Puerto Rican tody										5.9	12.6				0.0287674	0.632552	0.338681
Aves	Cuculiformes	Cuculidae	Coccyzus	americanus	Yellow-billed cuckoo	365	365	14		3	1		8.5		57.8	5				0.139383	0.289654	0.570963
Aves	Cuculiformes	Cuculidae	Coccyzus	erythropthalmus	Black-billed cuckoo	365	365	14		2.5	1		7.4		37.5	5				0.120498	0.315312	0.564189
Aves	Cuculiformes	Cuculidae	Cuculus	canorus	Common cuckoo and Eurasian cuckoo	365	365								111.5	12.9	0.838	111.6		0.156774	0.463531	0.379695
Aves	Cuculiformes	Cuculidae	Geococcyx	californianus	Greater roadrunner	365	365	20		4	1.5		14		376	9	1.4661	284.7		0.21412	0.310595	0.475285
Aves	Cuculiformes	Cuculidae	Saurothera	vieilloti	Puerto Rican lizard cuckoo										81.9	7.6				0.149608	0.363014	0.487378
Aves	Eurypygiformes	Eurypygidae	Eurypyga	helias	Sunbittern			27		2					210	15				0.182611	0.459856	0.357533
Aves	Falconiformes	Falconidae	Caracara	cheriway	Crested caracara			32		2	1.5		51.17		1031	25.8				0.245605	0.487278	0.267116
Aves	Falconiformes	Falconidae	Caracara	plancus	Southern caracara										1348	37.6				0.252822	0.555958	0.19122
Aves	Falconiformes	Falconidae	Falco	berigora	Brown falcon										593.5	24				0.222362	0.503789	0.273849
Aves	Falconiformes	Falconidae	Falco	cherrug	Saker falcon										966	15.9				0.248528	0.382437	0.369036
Aves	Falconiformes	Falconidae	Falco	columbarius	Merlin	365	365	30		5	1		13		195	12.7				0.181359	0.426872	0.39177
Aves	Falconiformes	Falconidae	Falco	eleonorae	Eleonora's falcon										390	11.2				0.213111	0.357538	0.429351
Aves	Falconiformes	Falconidae	Falco	femoralis	Aplomado falcon			32		2.64			17.5		342.5	12				0.20662	0.380734	0.412646
Aves	Falconiformes	Falconidae	Falco	mexicanus	Prairie falcon	365	365	31		4	1		30.6		858	17.2				0.242417	0.407117	0.350466
Aves	Falconiformes	Falconidae	Falco	naumanni	Lesser kestrel	365	365								152.5	10.9				0.172449	0.407128	0.420423
Aves	Falconiformes	Falconidae	Falco	peregrinus	Peregrine falcon	365	365	30		3	1		37.5		840	25				0.237038	0.492355	0.270607
Aves	Falconiformes	Falconidae	Falco	punctatus	Mauritius kestrel										169.5	10				0.178088	0.381507	0.440404
Aves	Falconiformes	Falconidae	Falco	rusticolus	Gyrfalcon	730	730	35		3.72	1		52.08		1406.5	13.5				0.266875	0.323409	0.409715
Aves	Falconiformes	Falconidae	Falco	sparverius	American kestrel	365	365	29		4.6	1.5		9		117	17				0.155589	0.522654	0.321758
Aves	Falconiformes	Falconidae	Falco	subbuteo	European hobby	365	365								209.5	14.9	1.3014	208		0.182587	0.458495	0.358918
Aves	Falconiformes	Falconidae	Falco	tinnunculus	Common kestrel	365	365								184	23.8				0.171344	0.571363	0.257293
Aves	Falconiformes	Falconidae	Falco	vespertinus	Red-footed falcon										152.5	13.2				0.170169	0.450123	0.379709
Aves	Galliformes	Cracidae	Crax	globulosa	Wattled curassow										2500	20				0.2873	0.377562	0.335137
Aves	Galliformes	Cracidae	Crax	rubra	Great curassow										4133	24				0.307072	0.388692	0.304236
Aves	Galliformes	Cracidae	Mitu	tuberosum	Razor-billed curassow										2813	23				0.290785	0.401953	0.307262
Aves	Galliformes	Cracidae	Ortalis	vetula	Plain chachalaca	365	365	23		3	2				495.5	8.8				0.226433	0.289182	0.484385
Aves	Galliformes	Megapodiidae	Alectura	lathami	Brush turkey										2340	12.5				0.290011	0.275937	0.434052
Aves	Galliformes	Megapodiidae	Macrocephalon	maleo	Maleo										1564	23				0.265163	0.436766	0.298071
Aves	Galliformes	Odontophoridae	Callipepla	californica	California quail	274	274	22		14	1		6		138	9.6				0.1696	0.384533	0.445866
Aves	Galliformes	Odontophoridae	Callipepla	gambelii	Gambel's quail	365	365	22		11	1				166	7.4	0.755	126.1		0.180763	0.315126	0.504111
Aves	Galliformes	Odontophoridae	Colinus	virginianus	Common bobwhite	365	365	23		15	1.5				194	6.4				0.189296	0.273279	0.537425
Aves	Galliformes	Phasianidae	Alectoris	rufa	Red-legged partridge										528	6.2				0.233377	0.206769	0.559854
Aves	Galliformes	Phasianidae	Bonasa	umbellus	Ruffed grouse	120	120	24		11	1		12		532	11	2.3894	644		0.226878	0.335077	0.438045
Aves	Galliformes	Phasianidae	Centrocercus	urophasianus	Sage grouse	365	365	26		7	1		30.5		1929.5	7				0.288497	0.157167	0.554336
Aves	Galliformes	Phasianidae	Chrysolophus	amherstiae	Lady Amherst's pheasant			24							738	19.6				0.234285	0.445385	0.32033
Aves	Galliformes	Phasianidae	Chrysolophus	pictus	Golden pheasant	365	365	22		10					625	13.4				0.23156	0.369843	0.398597
Aves	Galliformes	Phasianidae	Coturnix	chinensis	King quail										45	5				0.128457	0.304499	0.567044
Aves	Galliformes	Phasianidae	Coturnix	coturnix	Common quail	365	365								96.5	14.6	0.891	97		0.148993	0.4999	0.351106
Aves	Galliformes	Phasianidae	Coturnix	japonica	Japanese quail	63	52	17							115	6				0.16724	0.289798	0.542962
Aves	Galliformes	Phasianidae	Dendragapus	obscurus	Blue grouse	365	365	26		8	1		22.6		1058.5	14	4.957	1131		0.254035	0.348434	0.397531
Aves	Galliformes	Phasianidae	Falcipennis	canadensis	Spruce grouse	365	365	20		5			15		417.3	13				0.214289	0.386994	0.398717
Aves	Galliformes	Phasianidae	Francolinus	francolinus	Black francolin			19		7	2		12.5		453	7				0.225244	0.243109	0.531646
Aves	Galliformes	Phasianidae	Francolinus	pondicerianus	Gray francolin			18		7.5	2.5				334	8				0.210352	0.29117	0.498478
Aves	Galliformes	Phasianidae	Gallus	gallus	Red junglefowl (chicken)										779.8	30	6.005	2710		0.23162	0.537709	0.23067
Aves	Galliformes	Phasianidae	Lagopus	lagopus	Willow ptarmigan	365	365	21		6	1		14.72		595.875	9	2.872	567		0.234217	0.283288	0.482494
Aves	Galliformes	Phasianidae	Lagopus	leucura	White-tailed ptarmigan		365	23		6	1		12.9		326	15				0.201808	0.433773	0.364419
Aves	Galliformes	Phasianidae	Lyrurus	tetrix	Black grouse	365	365								1079	12.2				0.256511	0.316391	0.427098
Aves	Galliformes	Phasianidae	Meleagris	gallopavo	Wild turkey	304	365	28		11	1		47		6050	13				0.331006	0.228409	0.440585
Aves	Galliformes	Phasianidae	Pavo	cristatus	Peafowl	730	730	29		5			120		4200	23.2				0.308178	0.380125	0.311697
Aves	Galliformes	Phasianidae	Perdix	perdix	Gray partridge	365	365	24		16			10		492	5.2	2.1783	501		0.232389	0.171458	0.596153
Aves	Galliformes	Phasianidae	Phasianus	colchicus	Common pheasant	240	240	24		11	1		18.5		1094.8	27				0.247685	0.493927	0.258389
Aves	Galliformes	Phasianidae	Polyplectron	napoleonis	Palawan peacock pheasant	730	365	19		2					550	15				0.224637	0.402755	0.372608
Aves	Galliformes	Phasianidae	Syrmaticus	reevesii	Reeves pheasant										1239	9.2				0.265908	0.24481	0.489282
Aves	Galliformes	Phasianidae	Tetrao	urogallus	Western capercaillie	1095	1095								2950	18	11.816	4010		0.29578	0.344086	0.360135
Aves	Galliformes	Phasianidae	Tetrastes	bonasia	Hazel grouse										429	7.2				0.222533	0.252664	0.524803
Aves	Galliformes	Phasianidae	Tympanuchus	cupido	Greater prairie chicken	365	183	23		13	1		11.5		908	5				0.259603	0.126309	0.614088
Aves	Galliformes	Phasianidae	Tympanuchus	pallidicinctus	Lesser prairie chicken	365	183	23		11	1				794.5	13.5				0.241945	0.357282	0.400773
Aves	Galliformes	Phasianidae	Tympanuchus	phasianellus	Sharp-tailed grouse	180	180	23		12	1		12.8		908	7.5				0.254774	0.217364	0.527862
Aves	Gaviiformes	Gaviidae	Gavia	arctica	Black-throated diver	1095	1095	29		1.74	2		72.33		2724	28				0.287039	0.448034	0.264927
Aves	Gaviiformes	Gaviidae	Gavia	immer	Great northern diver	1461	1461	28		2	1		93.9		3405	24.1				0.298565	0.401117	0.300318
Aves	Gaviiformes	Gaviidae	Gavia	stellata	Red-throated diver	1095	1095	28		2	1		54.8		1816	24				0.271177	0.437464	0.29136
Aves	Gruiformes	Gruidae	Anthropoides	virgo	Demoiselle crane	730	730	28		2					2400	27				0.281945	0.447378	0.270678
Aves	Gruiformes	Gruidae	Balearica	regulorum	Grey crowned crane	1095	1095	30							3372	27.2				0.296699	0.428869	0.274433
Aves	Gruiformes	Gruidae	Grus	americana	Whooping crane	1460	1460	31		2			150		7500	40				0.326999	0.468067	0.204934
Aves	Gruiformes	Gruidae	Grus	antigone	Sarus crane			32							8663	41.8				0.332767	0.469403	0.197831
Aves	Gruiformes	Gruidae	Grus	canadensis	Sandhill crane	1095	1095	29		2	1		114.2		3890	36.6				0.299401	0.487053	0.213546
Aves	Gruiformes	Gruidae	Grus	grus	Lord Lilford's crane	1825	1825								5500	43				0.312599	0.502702	0.184698
Aves	Gruiformes	Gruidae	Grus	japonensis	Manchurian crane	1095	1095	31		2					8500	25.2				0.337964	0.356886	0.30515
Aves	Gruiformes	Gruidae	Grus	leucogeranus	Asiatic white crane										5931	36.2				0.317943	0.45957	0.222487
Aves	Gruiformes	Gruidae	Grus	monacha	Hooded crane	1040	1040								3700	24				0.302241	0.395256	0.302503
Aves	Gruiformes	Gruidae	Grus	rubicunda	Brolga										6250.5	33				0.321335	0.435675	0.242991
Aves	Gruiformes	Gruidae	Grus	vipio	White-naped crane	1095	1095	31		2					5400	45				0.311257	0.514	0.174743
Aves	Gruiformes	Rallidae	Fulica	americana	American coot	365	365	23		10	2		20.5		450.8	22.3				0.211233	0.5036	0.285167
Aves	Gruiformes	Rallidae	Fulica	atra	Coot	365	365								734.3	20.6	2.039	412		0.233473	0.456858	0.309669
Aves	Gruiformes	Rallidae	Gallinula	chloropus	Common moorhen	365	365	19		9	2		11.3		392	18.6				0.207293	0.471147	0.32156
Aves	Gruiformes	Rallidae	Gallirallus	australis	Weka										899.3	13.8				0.247092	0.354869	0.398039
Aves	Gruiformes	Rallidae	Rallus	aquaticus	Water rail	365	365								111.5	8.9				0.161195	0.380177	0.458629
Aves	Gruiformes	Rallidae	Rallus	longirostris	Clapper rail	365	365	22		10	2				308	7.5				0.207583	0.281483	0.510934
Aves	Musophagiformes	Musophagidae	Tauraco	leucotis	Donaldson Smith's touraco										265	12.4				0.195032	0.403312	0.401656
Aves	Otidiformes	Otididae	Otis	tarda	Great bustard										7895.5	28.3				0.333363	0.387315	0.279323
Aves	Passeriformes	Acanthizidae	Sericornis	frontalis	White-browed scrubwren	365	365								13.4	17.6				0.0605924	0.658954	0.280453
Aves	Passeriformes	Acrocephalidae	Acrocephalus	arundinaceus	Great reed-warbler	365	365								30	10.1	0.257	21.9		0.102385	0.48644	0.411175
Aves	Passeriformes	Acrocephalidae	Acrocephalus	dumetorum	Blyth's reed-warbler										11.2	7.8				0.062456	0.486842	0.450702
Aves	Passeriformes	Acrocephalidae	Acrocephalus	melanopogon	Moustached warbler	365	365								10.9	11.2				0.0569622	0.569699	0.373339
Aves	Passeriformes	Acrocephalidae	Acrocephalus	palustris	Marsh warbler	365	365								11.5	9.8	0.203	10.8		0.0608914	0.536534	0.402575
Aves	Passeriformes	Acrocephalidae	Acrocephalus	schoenobaenus	Sedge warbler	365	365								11.8	11.8	0.218	11.5		0.0598037	0.576713	0.363483
Aves	Passeriformes	Acrocephalidae	Acrocephalus	scirpaceus	Eurasian reed-warbler	365	365								12.3	14				0.0595791	0.612644	0.327777
Aves	Passeriformes	Acrocephalidae	Acrocephalus	sechellensis	Seychelles warbler										15.9	17				0.0684723	0.64102	0.290508
Aves	Passeriformes	Acrocephalidae	Acrocephalus	stentoreus	Indian great reed warbler										24.2	10.6				0.0924318	0.510032	0.397536
Aves	Passeriformes	Acrocephalidae	Hippolais	icterina	Icterine warbler	365	365								13.2	10.8	0.252	12.5		0.0657521	0.550177	0.38407
Aves	Passeriformes	Acrocephalidae	Hippolais	polyglotta	Melodious warbler	365	365								11	8.9				0.0600984	0.517537	0.422364
Aves	Passeriformes	Acrocephalidae	Iduna	pallida	Olivaceous warbler	365	365								9	7.9				0.0527588	0.502672	0.444569
Aves	Passeriformes	Aegithalidae	Aegithalos	caudatus	Long-tailed tit	365	365								8.6	11.1	0.199	8.9		0.0467242	0.58174	0.371535
Aves	Passeriformes	Aegithalidae	Psaltriparus	minimus	Bushtit	365	365	12		6	2				5.3	9.1	0.122375	5.5		0.0279619	0.565833	0.406206
Aves	Passeriformes	Alaudidae	Alauda	arvensis	Eurasian skylark	365	365	11		3	1				37.5	10.1	0.722	31.7		0.112125	0.473206	0.414669
Aves	Passeriformes	Alaudidae	Eremophila	alpestris	Horned lark	365	365	11		43	1.5		2.74		33.5	8	0.3133	26		0.109978	0.42755	0.462473
Aves	Passeriformes	Alaudidae	Galerida	cristata	Crested lark	365	365								42.9	11.6				0.116348	0.496323	0.387329
Aves	Passeriformes	Alaudidae	Lullula	arborea	Wood lark	365	365								26.9	6	0.572	25.5		0.103826	0.375958	0.520215
Aves	Passeriformes	Bombycillidae	Bombycilla	cedrorum	Cedar waxwing	365	365	14		4	2		3.1		30	8.2				0.104867	0.439639	0.455494
Aves	Passeriformes	Bombycillidae	Bombycilla	garrulus	Bohemian waxwing	365	365	14		5	1				54.5	13.5	0.9566	72.5		0.124988	0.516193	0.358819
Aves	Passeriformes	Cardinalidae	Cardinalis	cardinalis	Northern cardinal	365	365	12		3	2		3.5		42.6	28.5	0.5163	41		0.105336	0.698604	0.19606
Aves	Passeriformes	Cardinalidae	Cyanocompsa	parellina	Blue bunting										15.7	10.8				0.0733227	0.539891	0.386786
Aves	Passeriformes	Cardinalidae	Passerina	amoena	Lazuli bunting	365	365	12		4	1		1.3		15.15	9.9				0.0728024	0.522466	0.404732
Aves	Passeriformes	Cardinalidae	Passerina	caerulea	Blue grosbeak	365	365	11		4	1.5				28.4	10.2				0.0998753	0.491903	0.408222
Aves	Passeriformes	Cardinalidae	Passerina	ciris	Painted bunting	365	365	11		4	2		2		14.75	12				0.0693434	0.567254	0.363403
Aves	Passeriformes	Cardinalidae	Passerina	cyanea	Indigo bunting	365	365	12		3.5	1		2.1		15	11				0.0711133	0.546717	0.38217
Aves	Passeriformes	Cardinalidae	Pheucticus	ludovicianus	Rose-breasted grosbeak	365	365	12		4	1		4.5		47.325	24				0.111974	0.653774	0.234252
Aves	Passeriformes	Cardinalidae	Pheucticus	melanocephalus	Black-headed grosbeak	365	365	12		3	1		3		42	25				0.106278	0.670021	0.223702
Aves	Passeriformes	Cardinalidae	Spiza	americana	Dickcissel	365	365	12		4	1				33	4.8				0.115405	0.313726	0.570869
Aves	Passeriformes	Certhiidae	Certhia	familiaris	Eurasian treecreeper	365	365								9.1	8.2				0.0527972	0.510387	0.436816
Aves	Passeriformes	Cettiidae	Cettia	cetti	Cetti's warbler	365	365								13.3	9.3				0.0678623	0.51615	0.415988
Aves	Passeriformes	Cinclidae	Cinclus	cinclus	White-throated dipper	365	365								61.7	10.6				0.133284	0.454526	0.41219
Aves	Passeriformes	Cinclidae	Cinclus	mexicanus	American dipper	365	365			4	1.5				50.2	8.1				0.127484	0.406352	0.466164
Aves	Passeriformes	Coerebidae	Coereba	flaveola	Bananaquit										10.1	8.6				0.0567809	0.514899	0.42832
Aves	Passeriformes	Corcoracidae	Corcorax	melanoramphos	White-winged chough										364	16.3				0.20563	0.4459	0.34847
Aves	Passeriformes	Corcoracidae	Struthidea	cinerea	Apostlebird										132	25				0.156261	0.602107	0.241632
Aves	Passeriformes	Corvidae	Aphelocoma	californica	Western scrub jay			18		4	1		5.4		88.7	15.8				0.144374	0.522637	0.332989
Aves	Passeriformes	Corvidae	Aphelocoma	coerulescens	Scrub jay	365	365	17		4	1		4.2		78.7	15				0.139771	0.518062	0.342166
Aves	Passeriformes	Corvidae	Aphelocoma	insularis	Island scrub jay	365	365	18		4	1				114	15.3				0.15571	0.500533	0.343757
Aves	Passeriformes	Corvidae	Aphelocoma	ultramarina	Mexican jay			18		4	1		6		130	25				0.155595	0.603013	0.241393
Aves	Passeriformes	Corvidae	Coloeus	monedula	Eurasian crow and Eurasian jackdaw	730	730								246	20.3				0.185914	0.51842	0.295666
Aves	Passeriformes	Corvidae	Corvus	brachyrhynchos	American crow	730	730	18		5	1		15.6		384.8	20				0.205619	0.488543	0.305837
Aves	Passeriformes	Corvidae	Corvus	caurinus	Northwestern crow	730	730	18		4	1		13.5		294	16.7				0.196019	0.46401	0.339971
Aves	Passeriformes	Corvidae	Corvus	corax	Raven	1095	1095	19		5	1		25		1041.2	69	5.5656	1203		0.234319	0.70761	0.0580708
Aves	Passeriformes	Corvidae	Corvus	corone	Carrion crow	1095	1095								472.7	19.2	3.3531	518		0.215086	0.467174	0.31774
Aves	Passeriformes	Corvidae	Corvus	coronoides	Australian crow or raven										645	21.8				0.227139	0.477263	0.295598
Aves	Passeriformes	Corvidae	Corvus	cryptoleucus	Chihuahuan (white-necked) raven			21		5	1		14.4		534	21.8	3.86705	640		0.218896	0.488463	0.292641
Aves	Passeriformes	Corvidae	Corvus	frugilegus	Rook	730	730								453.5	22.9	2.6433	390		0.211177	0.509209	0.279614
Aves	Passeriformes	Corvidae	Corvus	hawaiiensis	Hawaiian crow	730	1460	20		3	1				520	25				0.216105	0.520797	0.263098
Aves	Passeriformes	Corvidae	Corvus	ossifragus	Fish crow	730	730	17		4	1				418	14.5				0.213062	0.411418	0.375521
Aves	Passeriformes	Corvidae	Cyanocitta	cristata	Blue jay	365	365	17		4	1		5.5		80.8	26.2				0.134279	0.641745	0.223976
Aves	Passeriformes	Corvidae	Cyanocitta	stelleri	Steller's jay	365	365	16		4	1				99.1	16.1				0.148989	0.520286	0.330725
Aves	Passeriformes	Corvidae	Cyanocorax	caeruleus	Azure jay										272	36				0.183477	0.641116	0.175407
Aves	Passeriformes	Corvidae	Garrulus	glandarius	Jay	365	365								159.7	17.9	1.39997	153		0.168555	0.515787	0.315658
Aves	Passeriformes	Corvidae	Gymnorhinus	cyanocephalus	Pinyon jay	365	365	17		4	1		6.26		105	14.6				0.152678	0.494894	0.352428
Aves	Passeriformes	Corvidae	Nucifraga	caryocatactes	Spotted nutcracker	365	365								183	16.2	1.346	147		0.175688	0.4853	0.339012
Aves	Passeriformes	Corvidae	Nucifraga	columbiana	Clark's nutcracker	365	365	18		2.5	1		7.1		130	17.4				0.159911	0.521628	0.318461
Aves	Passeriformes	Corvidae	Perisoreus	canadensis	Gray jay	365	365	17		3	1		5.7		70.3	19.2				0.131905	0.580194	0.287902
Aves	Passeriformes	Corvidae	Perisoreus	infaustus	Siberian jay										84.4	17.9				0.140719	0.553608	0.305673
Aves	Passeriformes	Corvidae	Pica	hudsonia	Black-billed magpie	365	730	18		6.5	1				177	20	1.196	158.9		0.171723	0.534599	0.293678
Aves	Passeriformes	Corvidae	Pica	nuttalli	Yellow-billed magpie	365	365	18		6.5	1		6.9		159	10	1.471	151.9		0.175297	0.3853	0.439403
Aves	Passeriformes	Corvidae	Pica	pica	Eurasian magpie	730	730	21							178	21.7				0.170997	0.552585	0.276418
Aves	Passeriformes	Corvidae	Pyrrhocorax	graculus	Alpine chough	1095	1095								211.5	24.4				0.177128	0.568694	0.254179
Aves	Passeriformes	Corvidae	Pyrrhocorax	pyrrhocorax	Cornish chough	730	730								277.8	20.3				0.19122	0.51121	0.29757
Aves	Passeriformes	Cotingidae	Rupicola	rupicola	Cock-of-the-rock										195	7				0.188453	0.293098	0.518449
Aves	Passeriformes	Emberizidae	Aimophila	aestivalis	Bachman's sparrow	365	365	13		4	2		1.91		19.6	3.9				0.0951376	0.297994	0.606868
Aves	Passeriformes	Emberizidae	Aimophila	ruficeps	Rufous-crowned sparrow	365	365	12		3	2				18.8	5.1				0.0901238	0.360709	0.549167
Aves	Passeriformes	Emberizidae	Ammodramus	caudacutus	Sharp-tailed sparrow	365	365	11		4			1.63		16.5	10				0.0764086	0.519661	0.403931
Aves	Passeriformes	Emberizidae	Ammodramus	henslowii	Henslow's sparrow										12.5	6.5				0.0694207	0.439386	0.491194
Aves	Passeriformes	Emberizidae	Ammodramus	maritimus	Seaside sparrow	365	365	12		4	2				20	9				0.0860602	0.484591	0.429349
Aves	Passeriformes	Emberizidae	Ammodramus	nelsoni	Nelson's sparrow										15.2	7.1				0.0769054	0.447615	0.47548
Aves	Passeriformes	Emberizidae	Ammodramus	savannarum	Grasshopper sparrow	365	365	11		4	2		2		17.6	9.1	0.1796	13.8		0.0803488	0.494654	0.424997
Aves	Passeriformes	Emberizidae	Amphispiza	belli	Sage sparrow										17.1	9.1				0.0790908	0.496363	0.424546
Aves	Passeriformes	Emberizidae	Amphispiza	bilineata	Black-throated sparrow			12		3	2		1.7		13.5	6	0.1988	11.6		0.0737332	0.416846	0.509421
Aves	Passeriformes	Emberizidae	Arremonops	rufivirgatus	Olive sparrow					3.5					22.4	8.2				0.0921155	0.456965	0.45092
Aves	Passeriformes	Emberizidae	Calamospiza	melanocorys	Lark bunting	365	365	12		5	1		3.28		32.6	4.8				0.114873	0.314449	0.570678
Aves	Passeriformes	Emberizidae	Calcarius	lapponicus	Lapland longspur			12		5	1		2.3		28.35	6				0.106118	0.372845	0.521037
Aves	Passeriformes	Emberizidae	Calcarius	pictus	Smith's longspur	365	365	12		4	1		2.6		26.65	5				0.10559	0.335568	0.558842
Aves	Passeriformes	Emberizidae	Chondestes	grammacus	Lark sparrow			12		4	1.5		2.2		27.1	7.8				0.101025	0.434438	0.464537
Aves	Passeriformes	Emberizidae	Emberiza	aureola	Yellow-breasted bunting										19.6	7				0.0881714	0.429352	0.482477
Aves	Passeriformes	Emberizidae	Emberiza	calandra	Corn bunting	365	365								48.8	10.6				0.123046	0.468436	0.408518
Aves	Passeriformes	Emberizidae	Emberiza	cirlus	Cirl bunting	365	365								25.6	6.1				0.101467	0.382608	0.515925
Aves	Passeriformes	Emberizidae	Emberiza	citrinella	Yellowhammer	365	365								29.7	13.2	0.436	26.8		0.0987583	0.547149	0.354093
Aves	Passeriformes	Emberizidae	Emberiza	hortulana	Ortolan bunting										19.9	6.8	0.407	27		0.0891796	0.421941	0.488879
Aves	Passeriformes	Emberizidae	Emberiza	melanocephala	Black-headed bunting										28.4	11				0.098976	0.508859	0.392165
Aves	Passeriformes	Emberizidae	Emberiza	schoeniclus	Common reed-bunting and reed bunting	365	365								18.4	12.2	0.3	17.6		0.0787977	0.557853	0.36335
Aves	Passeriformes	Emberizidae	Junco	hyemalis	Dark-eyed (slate-colored) junco	365	365	11		4	1.5		2.3		19	11.3	0.2959	18		0.0811109	0.53874	0.380149
Aves	Passeriformes	Emberizidae	Junco	phaeonotus	Yellow-eyed (Mexican) junco	365	365	13		2	1.5		2.42		20	6.6				0.089754	0.41494	0.495306
Aves	Passeriformes	Emberizidae	Loxigilla	portoricensis	Puerto rican bullfinch										32.1	15.6				0.100161	0.580055	0.319784
Aves	Passeriformes	Emberizidae	Melospiza	georgiana	Swamp sparrow	365	365	13		4	1.5		1.46		16.1	7.8	0.211	14.9		0.0782964	0.465319	0.456384
Aves	Passeriformes	Emberizidae	Melospiza	lincolnii	Lincoln's sparrow	365	365	11		4	1		1.69		17.35	7.6				0.0818696	0.455052	0.463079
Aves	Passeriformes	Emberizidae	Melospiza	melodia	Song sparrow	365	365	12		4	2.5		1.5		22.7	11.3	0.25	19.1		0.0888772	0.528188	0.382935
Aves	Passeriformes	Emberizidae	Passerculus	sandwichensis	Savannah sparrow	365	365	12		4	1		1.7		20.2	18	0.221	15.9		0.0782395	0.63966	0.2821
Aves	Passeriformes	Emberizidae	Passerella	iliaca	Fox sparrow			13		4	1		2.7		35.5	10.3				0.109499	0.48086	0.409641
Aves	Passeriformes	Emberizidae	Pipilo	aberti	Abert's towhee	365	365	14		3	1.5		3.63		46	8.6	0.73425	46.6		0.122957	0.424985	0.452058
Aves	Passeriformes	Emberizidae	Pipilo	chlorurus	Green-tailed towhee	365	365	12		4			3.8		28.88	7.7				0.103955	0.427767	0.468277
Aves	Passeriformes	Emberizidae	Pipilo	crissalis	California towhee			13			2				47	12.8				0.11916	0.513017	0.367824
Aves	Passeriformes	Emberizidae	Pipilo	erythrophthalmus	Eastern towhee	365	365	12		4			3.1		39.4	12.3				0.111935	0.514529	0.373536
Aves	Passeriformes	Emberizidae	Pipilo	fuscus	Canyon towhee	365	365	11		3	2.5				44.4	12.8	0.670615	43.7		0.116676	0.516392	0.366933
Aves	Passeriformes	Emberizidae	Pipilo	maculatus	Spotted towhee	730	730								40.4	11				0.11436	0.487957	0.397683
Aves	Passeriformes	Emberizidae	Plectrophenax	hyperboreus	Mckay's bunting					4					42	4.8				0.125931	0.299424	0.574645
Aves	Passeriformes	Emberizidae	Plectrophenax	nivalis	Snow bunting	365	365	12		5	1		3		41.8	9.6				0.117468	0.455366	0.427166
Aves	Passeriformes	Emberizidae	Pooecetes	gramineus	Vesper sparrow	365	365	12		4	2		2		25.7	7.9	0.27412	21.5		0.098558	0.440444	0.460998
Aves	Passeriformes	Emberizidae	Spizella	arborea	American tree sparrow	365	365	12		4	1		1.6		16.6	10.8				0.0757558	0.536585	0.387659
Aves	Passeriformes	Emberizidae	Spizella	breweri	Brewer's sparrow	365	365	11		3	1		1.32		11	6.2				0.0644037	0.436355	0.499241
Aves	Passeriformes	Emberizidae	Spizella	pallida	Clay-colored sparrow	335	335	12		4	1		1.2		11.45	6.9				0.0648798	0.458	0.47712
Aves	Passeriformes	Emberizidae	Spizella	passerina	Chipping sparrow	365	365	12		4	2		1.3		12.2	11.8	0.1945	11.9		0.0612587	0.574736	0.364005
Aves	Passeriformes	Emberizidae	Spizella	pusilla	Field sparrow	365	365	12		4					12.5	10.3				0.0639383	0.542764	0.393298
Aves	Passeriformes	Emberizidae	Sporophila	torqueola	White-collared seedeater			13		3					8.7	11.7				0.0466019	0.592877	0.360521
Aves	Passeriformes	Emberizidae	Zonotrichia	albicollis	White-throated sparrow	365	365	13		4	1.5		2.8		21.1	14.9	0.278	20.2		0.0823932	0.594629	0.322978
Aves	Passeriformes	Emberizidae	Zonotrichia	atricapilla	Golden-crowned sparrow	365	365	12		4	1.5		3.1		31.55	10.5				0.104121	0.492174	0.403704
Aves	Passeriformes	Emberizidae	Zonotrichia	leucophrys	White-crowned sparrow	365	365	12		4	1.5		2.7		25.82	13.3	0.336	26.1		0.0925577	0.557146	0.350296
Aves	Passeriformes	Emberizidae	Zonotrichia	querula	Harris' sparrow	365	365	13		4	1		3.1		33.1	11.7	0.4552	33.3		0.104926	0.513631	0.381443
Aves	Passeriformes	Estrildidae	Erythrura	gouldiae	Gouldian finch			13							12	6				0.0685921	0.423831	0.507576
Aves	Passeriformes	Estrildidae	Lonchura	striata	Bengal finch										12.3	10	0.21538	10.3		0.0635863	0.537082	0.399331
Aves	Passeriformes	Estrildidae	Taeniopygia	guttata	Zebra finch	60	60								12	12			314.15	0.0603371	0.579491	0.360172
Aves	Passeriformes	Fringillidae	Carduelis	cannabina	Eurasian linnet	365	365								19.5	9.4				0.0844372	0.495858	0.419705
Aves	Passeriformes	Fringillidae	Carduelis	carduelis	Eurasian goldfinch	365	365								16	27				0.0632363	0.744539	0.192225
Aves	Passeriformes	Fringillidae	Carduelis	chloris	European greenfinch	365	365								26	13.6				0.0925953	0.561743	0.345661
Aves	Passeriformes	Fringillidae	Carduelis	flammea	Common redpoll	365	365	10		5	2		1.3		14.2	12.2	0.2888	14		0.0674879	0.573219	0.359293
Aves	Passeriformes	Fringillidae	Carduelis	flavirostris	Twite	365	365								15.4	6.1				0.0792839	0.412749	0.507967
Aves	Passeriformes	Fringillidae	Carduelis	hornemanni	Hoary redpoll	365	365	12		4	1		1.3		19.25	6.8				0.0877301	0.423911	0.488359
Aves	Passeriformes	Fringillidae	Carduelis	pinus	Pine siskin			13		3	1		1.1		12.7	11	0.3003	14		0.063848	0.556588	0.379564
Aves	Passeriformes	Fringillidae	Carduelis	psaltria	Lesser goldfinch			12		4	1				9.23	5.7				0.0577475	0.427877	0.514375
Aves	Passeriformes	Fringillidae	Carduelis	spinus	Eurasian siskin	365	365								13.2	13.5				0.0630945	0.600289	0.336617
Aves	Passeriformes	Fringillidae	Carduelis	tristis	American goldfinch			13		5	2		1.08		12.8	13	0.4108	13.6		0.0622009	0.593638	0.344161
Aves	Passeriformes	Fringillidae	Carpodacus	cassinii	Cassin's finch	365	365	13		4	1				27.5	7	0.339	27.4		0.102953	0.409267	0.487779
Aves	Passeriformes	Fringillidae	Carpodacus	erythrinus	Common rosefinch	365	365								24	9	0.358	21.6		0.0940183	0.473778	0.432203
Aves	Passeriformes	Fringillidae	Carpodacus	mexicanus	House finch			14		4	3				21.4	11.6	0.3108	20.4		0.085991	0.53757	0.376439
Aves	Passeriformes	Fringillidae	Carpodacus	purpureus	Purple finch	365	365	13		4	2				25.42	14				0.0912653	0.569591	0.339144
Aves	Passeriformes	Fringillidae	Coccothraustes	coccothraustes	Hawfinch	365	365								56.6	12.6				0.12746	0.498457	0.374083
Aves	Passeriformes	Fringillidae	Coccothraustes	vespertinus	Evening grosbeak			13		3	1.5				54.9	17	0.7294	54.5		0.122562	0.567528	0.30991
Aves	Passeriformes	Fringillidae	Fringilla	coelebs	Chaffinch	365	365								20.7	29	0.373	21		0.0736268	0.745312	0.181061
Aves	Passeriformes	Fringillidae	Fringilla	montifringilla	Brambling	365	365								23.2	14.8	0.383	21		0.0866147	0.58749	0.325895
Aves	Passeriformes	Fringillidae	Hemignathus	kauaiensis	Kauai amakihi			14		3			1.5		16.65	9				0.0780584	0.495463	0.426478
Aves	Passeriformes	Fringillidae	Hemignathus	munroi	Akiapolaau	365	365			1	1				28	13				0.0963674	0.547216	0.356417
Aves	Passeriformes	Fringillidae	Hemignathus	parvus	Anianiau	365	365	14		3	1		1.2		10	9.5				0.0551612	0.537841	0.406998
Aves	Passeriformes	Fringillidae	Hemignathus	virens	Hawaii amakihi			14		2.5	1.5		1.5		13.35	12				0.0649905	0.573168	0.361842
Aves	Passeriformes	Fringillidae	Himatione	sanguinea	Apapane			13		3	1		3		13.4	11	0.3	13.5		0.0661899	0.553406	0.380404
Aves	Passeriformes	Fringillidae	Leucosticte	atrata	Black rosy-finch	365	365	13		5	1				24	8.6				0.0945597	0.463569	0.441871
Aves	Passeriformes	Fringillidae	Leucosticte	australis	Brown-capped rosy finch										26.6	5.9				0.103537	0.372849	0.523614
Aves	Passeriformes	Fringillidae	Leucosticte	tephrocotis	Gray-crowned rosy-finch	365	365	14		4	2				35.7	6.6				0.115045	0.380577	0.504378
Aves	Passeriformes	Fringillidae	Loxia	curvirostra	Red crossbill	365	365	13		3	2				39.5	16.1	0.607	39.4		0.10884	0.574837	0.316323
Aves	Passeriformes	Fringillidae	Loxia	leucoptera	White-winged crossbill			13		3	3				28.9	4	0.46992	29.8		0.111785	0.28065	0.607564
Aves	Passeriformes	Fringillidae	Loxioides	bailleui	Palila	365	730	16		2	1		2		37.85	13				0.109524	0.529339	0.361136
Aves	Passeriformes	Fringillidae	Loxops	coccineus	Akepa	365	730	15		1.5	1				10.4	10				0.0562623	0.547034	0.396704
Aves	Passeriformes	Fringillidae	Melamprosops	phaeosoma	Poo-uli										25.5	9.2				0.0964027	0.475119	0.428479
Aves	Passeriformes	Fringillidae	Palmeria	dolei	Akohekohe or crested honeycreeper	730	730	17		1.5	2.5		2.13		26.2	9.2				0.0975848	0.473513	0.428903
Aves	Passeriformes	Fringillidae	Pinicola	enucleator	Pine grosbeak	365	365	13		4					65.3	9.8				0.136694	0.43354	0.429766
Aves	Passeriformes	Fringillidae	Pyrrhula	pyrrhula	Eurasian bullfinch	365	365								24.4	17.5				0.0868203	0.622131	0.291049
Aves	Passeriformes	Fringillidae	Serinus	canaria	House canary										24.3	24	0.230065	13.3	314.15	0.0828794	0.693305	0.223815
Aves	Passeriformes	Fringillidae	Telespiza	cantans	Laysan finch			16		3	2		2.92		33.3	12				0.104887	0.51896	0.376153
Aves	Passeriformes	Fringillidae	Telespiza	ultima	Nihoa finch			15		3					24.5	12				0.0914922	0.53716	0.371348
Aves	Passeriformes	Fringillidae	Vestiaria	coccinea	Iiwi										18.3	8.8				0.0824504	0.484813	0.432737
Aves	Passeriformes	Hirundinidae	Cecropis	daurica	Red-rumped swallow										22.2	9				0.0906154	0.478402	0.430983
Aves	Passeriformes	Hirundinidae	Delichon	urbicum	Common house-martin and northern house-martin	365	365								14.5	15				0.0659398	0.618378	0.315682
Aves	Passeriformes	Hirundinidae	Hirundo	rustica	Barn swallow	365	365	15		6	2		2.3		18.3	16	0.3158	18		0.0753305	0.619068	0.305601
Aves	Passeriformes	Hirundinidae	Petrochelidon	fulva	Cave swallow	365				4	2				20.15	12.2				0.0827633	0.552464	0.364772
Aves	Passeriformes	Hirundinidae	Petrochelidon	pyrrhonota	American cliff swallow	365	365	14		4	1		1.9		23.24	11.8				0.0893877	0.536517	0.374095
Aves	Passeriformes	Hirundinidae	Progne	subis	Purple martin	365	365	15		5	1		2.8		45	13.8				0.116366	0.532489	0.351146
Aves	Passeriformes	Hirundinidae	Riparia	riparia	Bank swallow	365	365	15		4			1.6		12.7	10	0.2328	13.6		0.0649831	0.535184	0.399832
Aves	Passeriformes	Hirundinidae	Stelgidopteryx	ruficollis	Rough-winged swallow			14		6					16	5.9				0.0813493	0.402996	0.515655
Aves	Passeriformes	Hirundinidae	Stelgidopteryx	serripennis	Northern rough-winged swallow	365	365								15.7	5.9				0.0805231	0.404118	0.515359
Aves	Passeriformes	Hirundinidae	Tachycineta	bicolor	Tree swallow	365	365	14		5	1		1.6		19	12.1				0.0802963	0.554101	0.365603
Aves	Passeriformes	Hirundinidae	Tachycineta	thalassina	Violet-green swallow			14		4	1		1.66		14.2	9.1				0.0709793	0.507384	0.421636
Aves	Passeriformes	Icteridae	Agelaius	phoeniceus	Red-winged blackbird	365	365	12		3.5	1.5		2.75		56.7	20				0.122034	0.602112	0.275854
Aves	Passeriformes	Icteridae	Agelaius	tricolor	Tricolored blackbird			11		3	2		3.05		56.5	13.2				0.126829	0.509009	0.364162
Aves	Passeriformes	Icteridae	Agelaius	xanthomus	Yellow-shouldered blackbird										38.4	12.6				0.110526	0.521465	0.368008
Aves	Passeriformes	Icteridae	Dolichonyx	oryzivorus	Bobolink	365	365	13		5	1.5				35	9				0.110487	0.451402	0.438111
Aves	Passeriformes	Icteridae	Euphagus	carolinus	Rusty blackbird	365	365	14		4.5	1				60.8	8.8				0.134859	0.413604	0.451536
Aves	Passeriformes	Icteridae	Euphagus	cyanocephalus	Brewer's blackbird	365	365	13		5	1.5		3.7		64.55	12.5				0.133292	0.488873	0.377835
Aves	Passeriformes	Icteridae	Icterus	bullockii	Bullock's oriole	365	365	11		5					36.62	8.9				0.112595	0.44621	0.441195
Aves	Passeriformes	Icteridae	Icterus	cucullatus	Hooded oriole			13		4	2				24.3	6				0.0993894	0.381987	0.518624
Aves	Passeriformes	Icteridae	Icterus	galbula	Northern (Baltimore) oriole			13		4	1		2		32.9	14	0.5052	37.5		0.102524	0.554294	0.343182
Aves	Passeriformes	Icteridae	Icterus	leucopteryx	Jamaican oriole										36.9	12.2				0.109171	0.516584	0.374245
Aves	Passeriformes	Icteridae	Icterus	parisorum	Scott's oriole			14		3	1		2		36.2	6.4				0.116018	0.372842	0.51114
Aves	Passeriformes	Icteridae	Icterus	pectoralis	Spot-breasted oriole					3					46.5	11.6				0.119865	0.491545	0.38859
Aves	Passeriformes	Icteridae	Icterus	spurius	Orchard oriole	365		13		5	1				21	17.7				0.0801349	0.633582	0.286283
Aves	Passeriformes	Icteridae	Molothrus	ater	Brown-headed cowbird	365	365	11			1		2.22		38.1	16.9	0.6315	42.5		0.106687	0.587868	0.305445
Aves	Passeriformes	Icteridae	Quiscalus	major	Boat-tailed grackle			13		4	1		6.64		152.6	13.9				0.169582	0.461688	0.36873
Aves	Passeriformes	Icteridae	Quiscalus	mexicanus	Great-tailed grackle	365	730	13		3	1.5		6.21		168.7	12.5				0.175224	0.431899	0.392877
Aves	Passeriformes	Icteridae	Quiscalus	quiscula	Common grackle			14		5	1		5.57		111	23.1				0.149639	0.594633	0.255728
Aves	Passeriformes	Icteridae	Sturnella	magna	Eastern meadowlark	365	365	13		5	1		5		94.71	12.6				0.149931	0.467926	0.382143
Aves	Passeriformes	Icteridae	Sturnella	neglecta	Western meadowlark	365	365	14		3	2		7		85	10				0.147962	0.422441	0.429598
Aves	Passeriformes	Icteridae	Xanthocephalus	xanthocephalus	Yellow-headed blackbird	289		12		4	1		3.3		75.75	18				0.135933	0.561272	0.302795
Aves	Passeriformes	Laniidae	Lanius	collurio	Red-backed shrike	365	365								28.4	10.1	0.383	27		0.0999926	0.48969	0.410317
Aves	Passeriformes	Laniidae	Lanius	excubitor	Northern shrike	335	335			5	1		4		63.5	12	0.8161	72.4		0.133062	0.480679	0.386259
Aves	Passeriformes	Laniidae	Lanius	ludovicianus	Loggerhead shrike	365	365	11		5	2		3.2		46	12.5				0.118503	0.508966	0.37253
Aves	Passeriformes	Laniidae	Lanius	senator	Woodchat shrike	365	365								36	5.7				0.117156	0.347158	0.535686
Aves	Passeriformes	Leiothrichidae	Leiothrix	lutea	Red-billed leothrix			12					3.1		21.5	15				0.0831332	0.595018	0.321849
Aves	Passeriformes	Leiothrichidae	Turdoides	squamiceps	Arabian babbler										73.5	13.5				0.138043	0.498456	0.363502
Aves	Passeriformes	Leiothrichidae	Turdoides	striata	Bengal jungle babbler										66	16.5				0.130955	0.549903	0.319142
Aves	Passeriformes	Locustellidae	Locustella	fluviatilis	River warbler										16.1	6.9				0.0797566	0.437787	0.482457
Aves	Passeriformes	Locustellidae	Locustella	luscinioides	Savi's warbler	365	365								13.9	9.8				0.0691647	0.525293	0.405542
Aves	Passeriformes	Locustellidae	Locustella	naevia	Common grasshopper-warbler	365	365								13.3	5.9				0.0732819	0.413957	0.512761
Aves	Passeriformes	Maluridae	Malurus	cyaneus	Superb fairywren	365	365								10.4	10.4				0.0557952	0.555841	0.388363
Aves	Passeriformes	Mimidae	Dumetella	carolinensis	Gray catbird	365	365	13		4	2				34.5	17.9				0.10167	0.606664	0.291666
Aves	Passeriformes	Mimidae	Margarops	fuscatus	Pearly-eyed thrasher										98.6	10.6				0.153746	0.426724	0.41953
Aves	Passeriformes	Mimidae	Mimus	polyglottos	Northern mockingbird	365	365	12		4			3.5		53	20				0.119089	0.606114	0.274798
Aves	Passeriformes	Mimidae	Toxostoma	bendirei	Bendire's thrasher					3	2				62.2	9.5				0.134941	0.429443	0.435616
Aves	Passeriformes	Mimidae	Toxostoma	crissale	Crissal thrasher	274	274	14		2.5	2				62.7	4.8				0.143421	0.27566	0.580919
Aves	Passeriformes	Mimidae	Toxostoma	curvirostre	Curve-billed thrasher	365	365	13		3	2		5.5		80.65	10.8				0.144752	0.442839	0.412409
Aves	Passeriformes	Mimidae	Toxostoma	lecontei	Leconte's thrasher	312	312	16		3	1.5		3.99		61.82	5.7				0.140757	0.315091	0.544152
Aves	Passeriformes	Mimidae	Toxostoma	longirostre	Long-billed thrasher			14		4	2		4.2		67.65	7.8				0.140956	0.380184	0.478861
Aves	Passeriformes	Mimidae	Toxostoma	redivivum	California thrasher	228	228	14		3	2				84.4	6.9				0.152072	0.339531	0.508397
Aves	Passeriformes	Mimidae	Toxostoma	rufum	Brown thrasher	274	274	13		4	4		5.6		67	12.8				0.134635	0.49199	0.373375
Aves	Passeriformes	Monarchidae	Chasiempis	sandwichensis	Elepaio	365	365			2					15	17.8				0.0653812	0.654802	0.279816
Aves	Passeriformes	Motacillidae	Anthus	cervinus	Red-throated pipit										20.9	4.5				0.0962365	0.326321	0.577442
Aves	Passeriformes	Motacillidae	Anthus	petrosus	Rock pipit	365	365								22.4	10.9				0.0887257	0.520884	0.390391
Aves	Passeriformes	Motacillidae	Anthus	pratensis	Meadow pipit	365	365								18.4	8.8	0.3	18.9		0.0826883	0.484489	0.432822
Aves	Passeriformes	Motacillidae	Anthus	rubescens	American pipit	365	365	14		5	1		1.85		20.8	5.1				0.0945365	0.354714	0.55075
Aves	Passeriformes	Motacillidae	Anthus	spinoletta	Water pipit			14		4					21.2	8.8				0.0888712	0.476089	0.43504
Aves	Passeriformes	Motacillidae	Anthus	trivialis	Brown tree-pipit and tree pipit	365	365								23.4	8.8	0.339	19.7		0.0931808	0.470233	0.436586
Aves	Passeriformes	Motacillidae	Motacilla	alba	White wagtail	365	365	13		5	1				24.1	13.7	0.3	18		0.0891958	0.567889	0.342915
Aves	Passeriformes	Motacillidae	Motacilla	cinerea	Gray wagtail and grey wagtail	365	365								17.2	8				0.0808797	0.467085	0.452035
Aves	Passeriformes	Motacillidae	Motacilla	flava	Yellow wagtail	365	365	11		5	1		1.5		17.7	8.8	0.257	14.7		0.0809953	0.48679	0.432215
Aves	Passeriformes	Muscicapidae	Copsychus	malabaricus	White-rumped shama			14			2		2.67		29.35	7				0.105795	0.405406	0.488799
Aves	Passeriformes	Muscicapidae	Erithacus	rubecula	European robin	365	365								17.3	19.3	0.281	17.6		0.0706445	0.664511	0.264844
Aves	Passeriformes	Muscicapidae	Erythropygia	galactotes	Rufous-tailed scrub-robin										20.3	7				0.0897031	0.427271	0.483026
Aves	Passeriformes	Muscicapidae	Ficedula	albicollis	Collared flycatcher	365	365								12.7	9.8				0.0652237	0.530648	0.404129
Aves	Passeriformes	Muscicapidae	Ficedula	hypoleuca	European pied flycatcher	365	365								13.9	15	0.232	11.7		0.0640952	0.620885	0.31502
Aves	Passeriformes	Muscicapidae	Luscinia	luscinia	Thrush nightingale	365	365								23.8	8.9				0.0937861	0.471765	0.434448
Aves	Passeriformes	Muscicapidae	Luscinia	megarhynchos	Common nightingale	365	365								19.7	10.9				0.0831194	0.528501	0.38838
Aves	Passeriformes	Muscicapidae	Luscinia	svecica	Bluethroat	365	365	13		6	1				17.3	11.4				0.0769147	0.546278	0.376808
Aves	Passeriformes	Muscicapidae	Muscicapa	striata	Spotted flycatcher	365	365								15.9	11.8	0.2476	14.4		0.0728206	0.559027	0.368153
Aves	Passeriformes	Muscicapidae	Oenanthe	hispanica	Black-eared wheatear										15.1	4.9				0.0810341	0.364723	0.554243
Aves	Passeriformes	Muscicapidae	Oenanthe	oenanthe	Northern wheatear	365	365	14					2.8		25	10.1				0.0944268	0.497253	0.408321
Aves	Passeriformes	Muscicapidae	Phoenicurus	ochruros	Black redstart	365	365								16.5	10.2				0.0761727	0.524108	0.39972
Aves	Passeriformes	Muscicapidae	Phoenicurus	phoenicurus	Common redstart	365	365								14.6	10.2				0.0708328	0.531363	0.397804
Aves	Passeriformes	Muscicapidae	Saxicola	rubetra	Whinchat	365	365								16.6	6.9				0.0810915	0.435973	0.482936
Aves	Passeriformes	Muscicapidae	Saxicola	torquatus	Common stonechat and stonechat	365	365								10.3	8.8				0.057363	0.518899	0.423738
Aves	Passeriformes	Oriolidae	Oriolus	oriolus	Eurasian golden-oriole	365	365								79	14.8				0.140097	0.514822	0.34508
Aves	Passeriformes	Oriolidae	Oriolus	xanthornus	Black-hooded oriole (hang-nest)										56.3	15.5				0.124761	0.545291	0.329949
Aves	Passeriformes	Oriolidae	Sphecotheres	viridis	Green figbird (hang-nest)										121.5	18				0.156556	0.533251	0.310193
Aves	Passeriformes	Panuridae	Panurus	biarmicus	Bearded parrotbill	365	365								13.8	7.1				0.0726878	0.453346	0.473967
Aves	Passeriformes	Paradisaeidae	Paradisaea	apoda	Bird of paradise										172	12.1				0.176457	0.423446	0.400096
Aves	Passeriformes	Paridae	Baeolophus	bicolor	Tufted (eastern) titmouse	365	365	13		6	1				21	13.3				0.0835387	0.569401	0.347061
Aves	Passeriformes	Paridae	Baeolophus	inornatus	Plain titmouse or oak titmouse	365	365	15		6	1				15.9	9				0.0760466	0.498197	0.425757
Aves	Passeriformes	Paridae	Baeolophus	wollweberi	Bridled titmouse	365	365	13		6	1				10.4	6.6				0.0612108	0.453722	0.485067
Aves	Passeriformes	Paridae	Cyanistes	caeruleus	Blue tit	365	365								10.3	14.6				0.0513336	0.632592	0.316075
Aves	Passeriformes	Paridae	Lophophanes	cristatus	Crested tit	365	365								11.1	11.6				0.0573379	0.576501	0.366161
Aves	Passeriformes	Paridae	Parus	major	Great tit	365	365								17.9	15.4				0.074821	0.611796	0.313383
Aves	Passeriformes	Paridae	Periparus	ater	Coal tit	365	365								9.2	9.5				0.0515217	0.542786	0.405692
Aves	Passeriformes	Paridae	Poecile	atricapillus	Black-capped chickadee	180	180	12		7	1		1		10.4	12.4	0.252	10.3		0.0537004	0.595341	0.350959
Aves	Passeriformes	Paridae	Poecile	carolinensis	Carolina chickadee	365	365	13		6	1				10.25	10.9				0.0546018	0.567248	0.37815
Aves	Passeriformes	Paridae	Poecile	cinctus	Siberian tit or gray-headed chickadee	365	365	15		8	1		1		12.5	9				0.0655451	0.512465	0.42199
Aves	Passeriformes	Paridae	Poecile	gambeli	Mountain chickadee	365	365	14		7	1.5		1		11.5	10.1				0.0605323	0.543305	0.396162
Aves	Passeriformes	Paridae	Poecile	hudsonicus	Boreal chickadee	365	365	15		6	1				10	7				0.0587981	0.469262	0.47194
Aves	Passeriformes	Paridae	Poecile	montanus	Willow tit										11.1	11.3				0.05765	0.570617	0.371733
Aves	Passeriformes	Paridae	Poecile	palustris	Marsh tit	365	365								11.2	11.9				0.0574253	0.581703	0.360872
Aves	Passeriformes	Paridae	Poecile	rufescens	Chestnut-backed chickadee	365	365	13		6.5	1				9.8	9.5				0.0542794	0.539039	0.406682
Aves	Passeriformes	Paridae	Poecile	sclateri	Mexican chickadee	365	365			6	1				11	10.1				0.058592	0.545942	0.395466
Aves	Passeriformes	Parulidae	Cardellina	rubrifrons	Red-faced warbler	365	365	13		4	1				9.8	3				0.0680072	0.280183	0.65181
Aves	Passeriformes	Parulidae	Dendroica	adelaidae	Adelaide's warbler										7	10.6				0.038288	0.583598	0.378114
Aves	Passeriformes	Parulidae	Dendroica	caerulescens	Black-throated blue warbler	365	365	13		4	2				10.2	10	0.18601	9.4		0.0554147	0.548185	0.3964
Aves	Passeriformes	Parulidae	Dendroica	castanea	Bay-breasted warbler			12		5	1				11.5	4.9				0.0691464	0.380875	0.549979
Aves	Passeriformes	Parulidae	Dendroica	cerulea	Cerulean warbler	365	365	12		4	1				8.625	6				0.0541775	0.443417	0.502406
Aves	Passeriformes	Parulidae	Dendroica	chrysoparia	Golden-cheeked warbler	365	365								10.2	8				0.0580722	0.498074	0.443854
Aves	Passeriformes	Parulidae	Dendroica	coronata	Yellow-rumped (myrtle) warbler			12		4	1				12	10	0.1895	11.5		0.0625085	0.538547	0.398945
Aves	Passeriformes	Parulidae	Dendroica	discolor	Prairie warbler			12		4	1.5		1.1		7	10.3				0.0386299	0.577151	0.384219
Aves	Passeriformes	Parulidae	Dendroica	dominica	Yellow-throated warbler	365	365	12		4	2				9.7	6.1	0.1604	9.8		0.0591076	0.440163	0.50073
Aves	Passeriformes	Parulidae	Dendroica	fusca	Blackburnian warbler			11		4	1				9	8.2				0.0523149	0.511042	0.436643
Aves	Passeriformes	Parulidae	Dendroica	kirtlandii	Kirtland's warbler	365	365	14		5	1		1.3		15.5	9				0.0749344	0.499708	0.425358
Aves	Passeriformes	Parulidae	Dendroica	magnolia	Magnolia warbler	365	365	12		4	1				7.5	8				0.0446509	0.51631	0.439039
Aves	Passeriformes	Parulidae	Dendroica	occidentalis	Hermit warbler	365	365			4					10	9.1				0.0556735	0.52818	0.416146
Aves	Passeriformes	Parulidae	Dendroica	palmarum	Western palm warbler			12		4	1				10.3	6.6	0.1554	9.8		0.0607891	0.454295	0.484916
Aves	Passeriformes	Parulidae	Dendroica	pensylvanica	Chestnut-sided warbler	365	365	12		4	1				9	6.9				0.0543707	0.472279	0.47335
Aves	Passeriformes	Parulidae	Dendroica	petechia	Yellow warbler	365	365	12		3	1		1.32		9.8	11				0.0525334	0.571961	0.375505
Aves	Passeriformes	Parulidae	Dendroica	pinus	Pine warbler	365	365	13		4	1				11.8	10.2	0.1795	12		0.061539	0.543991	0.39447
Aves	Passeriformes	Parulidae	Dendroica	striata	Blackpoll warbler	365	365	12		5	2		1.5		15	8.1				0.074758	0.477992	0.44725
Aves	Passeriformes	Parulidae	Dendroica	townsendi	Townsend's warbler			12		4	1				8.85	10.7				0.0484121	0.571799	0.379789
Aves	Passeriformes	Parulidae	Dendroica	virens	Black-throated green warbler	365	365	12		4					9	6				0.0560351	0.440893	0.503072
Aves	Passeriformes	Parulidae	Geothlypis	trichas	Common yellowthroat	365	365	12		4	1.5		1.74		9.5	11.5	0.17622	10.6		0.050647	0.583788	0.365565
Aves	Passeriformes	Parulidae	Helmitheros	vermivorum	Worm-eating warbler	365	365	13		5	1				12.5	8.1				0.0667999	0.488805	0.444396
Aves	Passeriformes	Parulidae	Icteria	virens	Yellow-breasted chat	365	365	11		5	1				26	8.9				0.0976451	0.466522	0.435833
Aves	Passeriformes	Parulidae	Limnothlypis	swainsonii	Swainson's warbler	365	365	14		3	1				13.5	9.9				0.0677692	0.529305	0.402926
Aves	Passeriformes	Parulidae	Mniotilta	varia	Black and white warbler	365	365	11		5	1				10.9	12.2	0.12727	8.2		0.0559437	0.588904	0.355152
Aves	Passeriformes	Parulidae	Myioborus	pictus	Painted redstart	304	304	13		4	2		1.36		9.75	6.6				0.0583938	0.457549	0.484057
Aves	Passeriformes	Parulidae	Oporornis	formosus	Kentucky warbler			12		4	1		3		14	6.9				0.0736561	0.446075	0.480268
Aves	Passeriformes	Parulidae	Oporornis	philadelphia	Mourning warbler			12		4					10	7.9				0.0573577	0.496424	0.446219
Aves	Passeriformes	Parulidae	Oporornis	tolmiei	Macgillivray's warbler										10.4	9				0.0575171	0.523373	0.41911
Aves	Passeriformes	Parulidae	Parula	americana	Northern parula	365	365	13		4	1				7.9	7	0.122375	7		0.0485092	0.483241	0.468249
Aves	Passeriformes	Parulidae	Protonotaria	citrea	Prothonotary warbler	365	365	13		5			1.95		14.3	8.1	0.1994	12.8		0.072672	0.480826	0.446502
Aves	Passeriformes	Parulidae	Seiurus	aurocapilla	Ovenbird	365	365	12		4	1		2.1		18.8	11	0.24475	19		0.0809695	0.533325	0.385705
Aves	Passeriformes	Parulidae	Seiurus	motacilla	Louisiana waterthrush	365	365	13		5	1		2.2		22.5	11.9				0.0878748	0.540331	0.371794
Aves	Passeriformes	Parulidae	Seiurus	noveboracensis	Northern waterthrush	365	365	12		4	1		1.9		16.3	8.9	0.28391	18.7		0.0772641	0.494214	0.428522
Aves	Passeriformes	Parulidae	Setophaga	ruticilla	American redstart	365	365	12		4	1				8.5	10.1				0.0473381	0.561233	0.391429
Aves	Passeriformes	Parulidae	Vermivora	celata	Orange-crowned warbler	365	365	12		4	1		1.5		9.2	8.6	0.151745	9.3		0.0527071	0.520435	0.426858
Aves	Passeriformes	Parulidae	Vermivora	chrysoptera	Golden-winged warbler	319	319	10		5	1				8.8	7.9				0.0517779	0.504005	0.444217
Aves	Passeriformes	Parulidae	Vermivora	luciae	Lucy's warbler			11		4.5	2				6.6	5.8				0.042901	0.451674	0.505425
Aves	Passeriformes	Parulidae	Vermivora	peregrina	Tennessee warbler	365	365	11		6	1		1.34		8.5	6.4				0.0527716	0.458776	0.488452
Aves	Passeriformes	Parulidae	Vermivora	pinus	Blue-winged warbler	365	365	11		5	1		1.5		8.9	9	0.1505	7.8		0.0507186	0.53261	0.416671
Aves	Passeriformes	Parulidae	Vermivora	ruficapilla	Nashville warbler	365	365	11		4	1		1.25		7.5	10.2				0.0417575	0.570868	0.387374
Aves	Passeriformes	Parulidae	Vermivora	virginiae	Virginia's warbler										8.2	6.2				0.0515813	0.453777	0.494642
Aves	Passeriformes	Parulidae	Wilsonia	canadensis	Canada warbler	365	365	12		4	1				10	8				0.0572079	0.499249	0.443544
Aves	Passeriformes	Parulidae	Wilsonia	citrina	Hooded warbler	319	319	12		4			1.9		10.6	8.2	0.21538	12		0.0594572	0.501338	0.439205
Aves	Passeriformes	Parulidae	Wilsonia	pusilla	Wilson's warbler	365	365	10		5	1				7	8.9				0.0403698	0.544343	0.415287
Aves	Passeriformes	Passeridae	Passer	domesticus	House sparrow	152	365	11		5	4		2.02		25.3	23				0.0851465	0.681356	0.233498
Aves	Passeriformes	Passeridae	Passer	hispaniolensis	Spanish sparrow	365	365								24.2	11.2				0.091776	0.522397	0.385827
Aves	Passeriformes	Passeridae	Passer	montanus	Eurasian tree sparrow	319	319	13		5	2.5		2		20.5	13.1	0.2007	17.5		0.0826673	0.567427	0.349906
Aves	Passeriformes	Passeridae	Petronia	petronia	Rock sparrow										30.2	7				0.107041	0.403713	0.489246
Aves	Passeriformes	Phylloscopidae	Phylloscopus	collybita	Common chiffchaff and Eurasian chiffchaff	365	365								8.3	8	0.165	8.2		0.0490748	0.510299	0.440626
Aves	Passeriformes	Phylloscopidae	Phylloscopus	sibillatrix	Wood warbler	365	365								9.2	10.2				0.050675	0.558752	0.390573
Aves	Passeriformes	Phylloscopidae	Phylloscopus	trochilus	Willow warbler	365	365								8.7	11.8	0.208	10.7		0.0465005	0.594788	0.358711
Aves	Passeriformes	Ploceidae	Bubalornis	albirostris	African ox birds										61.9	20				0.125864	0.596908	0.277228
Aves	Passeriformes	Ploceidae	Ploceus	cucullatus	Village weaver										36.2	24				0.100277	0.669667	0.230056
Aves	Passeriformes	Ploceidae	Quelea	quelea	Red-billed quelea	730	730								17.5	10				0.0789769	0.516171	0.404852
Aves	Passeriformes	Polioptilidae	Polioptila	caerulea	Blue-gray gnatcatcher	319	319	13		4	2		0.64		6.5	4.2				0.0460787	0.380094	0.573827
Aves	Passeriformes	Polioptilidae	Polioptila	californica	California gnatcatcher	365	365	14		4	2				6	8				0.0349109	0.529544	0.435545
Aves	Passeriformes	Prunellidae	Prunella	modularis	Hedge sparrow	365	365								20.2	20.8	0.325	16.8		0.0765176	0.672129	0.251354
Aves	Passeriformes	Pycnonotidae	Pycnonotus	jocosus	Red-whiskered bulbul			12		2.5	1.5		2		27.7	11.1				0.0977789	0.512372	0.389849
Aves	Passeriformes	Pycnonotidae	Pycnonotus	xanthopygos	White-spectacled bulbul										38.1	8.8				0.114459	0.441323	0.444219
Aves	Passeriformes	Regulidae	Regulus	calendula	Ruby-crowned kinglet	365	365	12		8	1				6.75	5.6				0.0442998	0.44246	0.51324
Aves	Passeriformes	Regulidae	Regulus	regulus	Goldcrest	365	365								5.6	7	0.184	5.5		0.0334898	0.503648	0.462862
Aves	Passeriformes	Regulidae	Regulus	satrapa	Golden-crowned kinglet	365	365	14		8	2		0.88		5.5	6.3				0.0339581	0.481056	0.484986
Aves	Passeriformes	Remizidae	Auriparus	flaviceps	Verdin	365	365	14		4	1.5		0.85		6.8	5.6				0.044622	0.442023	0.513355
Aves	Passeriformes	Remizidae	Remiz	pendulinus	Eurasian penduline-tit	365	365								9.3	7				0.0556305	0.473566	0.470804
Aves	Passeriformes	Sittidae	Sitta	canadensis	Red-breasted nuthatch	365	365	12		5	1				11.2	7.5				0.0629231	0.478034	0.459043
Aves	Passeriformes	Sittidae	Sitta	carolinensis	White-breasted nuthatch	365	365	12		8	1				20.5	9.8				0.0861238	0.50225	0.411626
Aves	Passeriformes	Sittidae	Sitta	europaea	Wood nuthatch or Eurasian nuthatch	365	365								20.4	12.9				0.0826371	0.564262	0.353101
Aves	Passeriformes	Sittidae	Sitta	pusilla	Brown-headed nuthatch	365	365	14		5	1		1.2		10.8	5.8				0.064397	0.422467	0.513136
Aves	Passeriformes	Sittidae	Sitta	pygmaea	Pygmy nuthatch	365	365	15		7	1		1.2		10.7	8.2				0.059867	0.500781	0.439352
Aves	Passeriformes	Sturnidae	Acridotheres	cristatellus	Crested myna			15		4			5.9		116.5	13	1.2092	109.4		0.158597	0.462664	0.378739
Aves	Passeriformes	Sturnidae	Lamprotornis	caudatus	Long-tailed glossy starling										121	17.8				0.156509	0.530987	0.312505
Aves	Passeriformes	Sturnidae	Lamprotornis	hildebrandti	Hildebrandt's starling										55.8	16.9				0.123342	0.565239	0.311419
Aves	Passeriformes	Sturnidae	Leucopsar	rothschildi	Bali mynah			13		3					95	25				0.141904	0.621615	0.236481
Aves	Passeriformes	Sturnidae	Sturnus	vulgaris	European starling	365	365	12		5	2		6.4		74	22.9	0.877	75		0.132045	0.616726	0.251229
Aves	Passeriformes	Sylviidae	Chamaea	fasciata	Wrentit	365	365	15		3.5					14.7	12.6				0.0686142	0.578412	0.352974
Aves	Passeriformes	Sylviidae	Sylvia	atricapilla	Blackcap	365	365								16.7	13.8				0.0730986	0.591276	0.335625
Aves	Passeriformes	Sylviidae	Sylvia	borin	Garden warbler	365	365								24.6	24	0.416	24.8		0.0834149	0.692578	0.224008
Aves	Passeriformes	Sylviidae	Sylvia	communis	Whitethroat	365	365								17.7	8.9				0.0808608	0.489327	0.429812
Aves	Passeriformes	Sylviidae	Sylvia	curruca	Lesser whitethroat	365	365								11.4	9	0.199	10.6		0.0615244	0.517928	0.420547
Aves	Passeriformes	Sylviidae	Sylvia	melanocephala	Sardinian warbler	365	365								11.7	8.3				0.0636225	0.498205	0.438173
Aves	Passeriformes	Sylviidae	Sylvia	nisoria	Barred warbler	365	365								22.5	11.9				0.0878748	0.540331	0.371794
Aves	Passeriformes	Thraupidae	Cyanerpes	caeruleus	Purple sugar bird										12	17				0.056189	0.657709	0.286102
Aves	Passeriformes	Thraupidae	Nesospingus	speculiferus	Puerto Rican tanager										35.2	4				0.120393	0.268955	0.610652
Aves	Passeriformes	Thraupidae	Piranga	ludoviciana	Western tanager	365	365	13		4	1				30	15.3				0.0974387	0.579707	0.322854
Aves	Passeriformes	Thraupidae	Piranga	olivacea	Scarlet tanager	365	365	13		4	1		2.97		29	11.9				0.098952	0.52528	0.375768
Aves	Passeriformes	Thraupidae	Piranga	rubra	Summer tanager	365	365	12		4	1.5		4.2		40	7.9				0.117868	0.414208	0.467924
Aves	Passeriformes	Thraupidae	Thraupis	episcopus	Blue-grey tanager			13		2					35	9.5				0.109843	0.463544	0.426613
Aves	Passeriformes	Troglodytidae	Campylorhynchus	brunneicapillus	Cactus wren	243		16		4	3		3.35		38.9	7.3				0.117591	0.398123	0.484285
Aves	Passeriformes	Troglodytidae	Thryomanes	bewickii	Bewick's wren	365	365	14		6	2		1.4		9.8	8				0.056326	0.500447	0.443227
Aves	Passeriformes	Troglodytidae	Thryothorus	ludovicianus	Carolina wren	365	365	14		4	1		2.42		17.5	9.2				0.0799699	0.497446	0.422584
Aves	Passeriformes	Troglodytidae	Troglodytes	aedon	House wren	365	365	13		7	2		1.07		9.7	9				0.0544756	0.527505	0.418019
Aves	Passeriformes	Troglodytidae	Troglodytes	troglodytes	Winter wren	365	365	15		5	1		1		9.1	7	0.213	9		0.0546816	0.474855	0.470464
Aves	Passeriformes	Turdidae	Catharus	bicknelli	Bicknell's thrush	365	365	12		4	1		1.7		27.5	11.9				0.0966338	0.52843	0.374936
Aves	Passeriformes	Turdidae	Catharus	fuscescens	Veery	365	365	11		4					28.8	10.1				0.100603	0.488861	0.410536
Aves	Passeriformes	Turdidae	Catharus	guttatus	Hermit thrush	365	365	12		4			4.12		27.8	10.8				0.0982625	0.506005	0.395732
Aves	Passeriformes	Turdidae	Catharus	minimus	Gray-cheeked thrush	365	365	13		4	1				24.8	7.3				0.0979428	0.42482	0.477237
Aves	Passeriformes	Turdidae	Catharus	ustulatus	Swainson's thrush	365	365	12		4	1		3.9		27.9	11				0.0982007	0.509913	0.391886
Aves	Passeriformes	Turdidae	Hylocichla	mustelina	Wood thrush	365	365	13		3	2		4.2		43.3	10.2				0.118285	0.46689	0.414826
Aves	Passeriformes	Turdidae	Ixoreus	naevius	Varied thrush	365	365	14		3	2				78.5	5.6				0.151395	0.296949	0.551656
Aves	Passeriformes	Turdidae	Sialia	currucoides	Mountain bluebird			13		5	2				29.6	9				0.103172	0.461341	0.435487
Aves	Passeriformes	Turdidae	Sialia	mexicana	Western bluebird	365	365	14		5	1.5		2.9		26.5	8.7	0.423	27.5		0.0987472	0.460288	0.440964
Aves	Passeriformes	Turdidae	Sialia	sialis	Eastern bluebird	306	321	14		4	2		2.4		30.5	10.5				0.102644	0.494182	0.403174
Aves	Passeriformes	Turdidae	Turdus	grayi	Clay-colored robin			12		3					74	9.6				0.142399	0.421492	0.436109
Aves	Passeriformes	Turdidae	Turdus	iliacus	Redwing	365	365								61.2	18.8	0.722	58		0.126105	0.583687	0.290208
Aves	Passeriformes	Turdidae	Turdus	merula	Common blackbird and Eurasian blackbird	365	365								103.2	21.8				0.147149	0.585946	0.266905
Aves	Passeriformes	Turdidae	Turdus	migratorius	American robin	365	365	13		3	2		5.5		75.5	17				0.136469	0.548632	0.314899
Aves	Passeriformes	Turdidae	Turdus	philomelos	Song thrush	365	365								67.8	17.7	0.726	62.8		0.131293	0.564073	0.304634
Aves	Passeriformes	Turdidae	Turdus	pilaris	Fieldfare	365	365								106	18.1				0.150533	0.542589	0.306878
Aves	Passeriformes	Turdidae	Turdus	plumbeus	Red-legged thrush										75.3	14.6				0.138166	0.514612	0.347222
Aves	Passeriformes	Turdidae	Turdus	torquatus	Ring ouzel	365	365								109	9.1				0.15994	0.386512	0.453548
Aves	Passeriformes	Turdidae	Turdus	viscivorus	Mistle thrush	365	365								117.5	21.2				0.153146	0.571983	0.274872
Aves	Passeriformes	Tyrannidae	Camptostoma	imberbe	Northern beardless tyrannulet					2	2				7.4	5.8				0.0478949	0.444888	0.507217
Aves	Passeriformes	Tyrannidae	Contopus	cooperi	Olive-sided flycatcher	365	365	15		3	1				32.8	11.1				0.105155	0.502349	0.392495
Aves	Passeriformes	Tyrannidae	Contopus	sordidulus	Western wood pewee			14		3	1				12.8	8.1				0.0678351	0.487398	0.444767
Aves	Passeriformes	Tyrannidae	Contopus	virens	Eastern wood pewee	365	365	13		3					13.9	8.2	0.2576	13.9		0.0712875	0.485264	0.443448
Aves	Passeriformes	Tyrannidae	Elaenia	martinica	Caribbean elaenia										20.9	13.6				0.0830647	0.574693	0.342243
Aves	Passeriformes	Tyrannidae	Empidonax	alnorum	Alder flycatcher	365	365	13		3.5	1				13.5	9.1				0.0687727	0.510382	0.420845
Aves	Passeriformes	Tyrannidae	Empidonax	difficilis	Western flycatcher	365	365	14		3.5	1.5		1.5		11	6.9				0.0631297	0.460378	0.476492
Aves	Passeriformes	Tyrannidae	Empidonax	hammondii	Hammond's flycatcher										10.4	7				0.0605101	0.466936	0.472554
Aves	Passeriformes	Tyrannidae	Empidonax	minimus	Least flycatcher	365	365	14		4	1.5				10	8				0.0572079	0.499249	0.443544
Aves	Passeriformes	Tyrannidae	Empidonax	oberholseri	Dusky flycatcher	365	365	15		4	1		1.19		10.95	9				0.0597664	0.520317	0.419917
Aves	Passeriformes	Tyrannidae	Empidonax	traillii	Willow (Traill's) flycatcher	365	365	13		3.5	1				12.6	11				0.063503	0.557057	0.37944
Aves	Passeriformes	Tyrannidae	Empidonax	virescens	Acadian flycatcher	365	365	13		3	1		1.9		12.6	12.1	0.1795	12.3		0.0623679	0.578461	0.359171
Aves	Passeriformes	Tyrannidae	Myiarchus	antillarum	Puerto rican flycatcher										23.4	13.6				0.0879964	0.567992	0.344012
Aves	Passeriformes	Tyrannidae	Myiarchus	cinerascens	Ash-throated flycatcher			15		4	1.5		3.7		28.5	11.9				0.0981929	0.526312	0.375495
Aves	Passeriformes	Tyrannidae	Myiarchus	crinitus	Great-crested flycatcher	365	365	14		5	1		3		32.1	14.9	0.384	33.9		0.100707	0.569745	0.329547
Aves	Passeriformes	Tyrannidae	Myiarchus	tyrannulus	Brown-crested flycatcher						1				35	11				0.108097	0.496467	0.395436
Aves	Passeriformes	Tyrannidae	Pyrocephalus	rubinus	Vermilion flycatcher	365	365	14		3	1.5		1.3		12.87	5.5				0.0726835	0.40014	0.527176
Aves	Passeriformes	Tyrannidae	Sayornis	nigricans	Black phoebe			16		4	1.5		1.5		18.25	8				0.0834661	0.463571	0.452963
Aves	Passeriformes	Tyrannidae	Sayornis	phoebe	Eastern phoebe			16		5	2		1.65		19.7	10.3	0.3449	21.6		0.0837937	0.515786	0.40042
Aves	Passeriformes	Tyrannidae	Tyrannus	tyrannus	Eastern kingbird	365	365	12		3	1		3.2		39.9	11.1	0.4372	35.7		0.113708	0.490728	0.395563
Aves	Passeriformes	Tyrannidae	Tyrannus	verticalis	Western kingbird	365	365	13		4	1		3.4		40.7	6.9				0.120237	0.382786	0.496977
Aves	Passeriformes	Vireonidae	Vireo	atricapilla	Black-capped vireo			15		4			1		8.65	12				0.0460488	0.598904	0.355047
Aves	Passeriformes	Vireonidae	Vireo	bellii	Bell's vireo	365	365	14		4	2		1.8		10	9.1				0.0556735	0.52818	0.416146
Aves	Passeriformes	Vireonidae	Vireo	flavifrons	Yellow-throated vireo	365	365	15		4	1				18	6.1				0.0860933	0.403497	0.51041
Aves	Passeriformes	Vireonidae	Vireo	gilvus	Warbling vireo	304	304	13		3.5	2				15	13.1				0.0690325	0.585953	0.345015
Aves	Passeriformes	Vireonidae	Vireo	griseus	White-eyed vireo	365	365	13		4	1		1.73		12	10.9				0.0614821	0.5579	0.380618
Aves	Passeriformes	Vireonidae	Vireo	huttoni	Hutton's vireo			14		4					11.3	13.5				0.0563109	0.609506	0.334184
Aves	Passeriformes	Vireonidae	Vireo	latimeri	Puerto rican vireo										12	16.8				0.0563299	0.655052	0.288618
Aves	Passeriformes	Vireonidae	Vireo	olivaceus	Red-eyed vireo	365	365	12		3.5	1		1.65		17	10.2				0.0774758	0.522337	0.400187
Aves	Passeriformes	Vireonidae	Vireo	philadelphicus	Philadelphia vireo			14		4	1				12	9.8				0.0627491	0.53401	0.403241
Aves	Passeriformes	Vireonidae	Vireo	solitarius	Solitary vireo	365	365	12		4	1				16	7.4				0.0786514	0.453867	0.467482
Aves	Passeriformes	Zosteropidae	Zosterops	japonicus	Japanese white-eye	365	365	11		3.5	2		1.1		11.25	5.1				0.0677106	0.391162	0.541127
Aves	Passeriformes	Zosteropidae	Zosterops	lateralis	Silvereye	365	365								12.7	13				0.0618585	0.594103	0.344038
Aves	Pelecaniformes	Ardeidae	Ardea	alba	Great egret	730	730	23		3	2				873.5	22.8				0.239842	0.46935	0.290808
Aves	Pelecaniformes	Ardeidae	Ardea	cinerea	Heron	730	730								1443	37.5				0.255826	0.551321	0.192853
Aves	Pelecaniformes	Ardeidae	Ardea	cocoi	Cocoi heron										1937.7	24.4				0.273811	0.437329	0.28886
Aves	Pelecaniformes	Ardeidae	Ardea	goliath	Goliath heron										4468	22.9				0.311033	0.373534	0.315433
Aves	Pelecaniformes	Ardeidae	Ardea	herodias	Great blue heron	669	669	28		4	2		50		1870	24.5				0.27221	0.440356	0.287434
Aves	Pelecaniformes	Ardeidae	Ardea	purpurea	Purple heron	730	730								1065.5	25.4				0.247228	0.481817	0.270955
Aves	Pelecaniformes	Ardeidae	Botaurus	lentiginosus	American bittern	365	365	34		4					706	8.3	2.7412	600		0.242584	0.255048	0.502368
Aves	Pelecaniformes	Ardeidae	Botaurus	stellaris	Bittern	730	730								1324.5	11.3				0.266372	0.287024	0.446604
Aves	Pelecaniformes	Ardeidae	Bubulcus	ibis	Cattle egret	730	730	22		3	1		19.1		390	23				0.204541	0.519133	0.276326
Aves	Pelecaniformes	Ardeidae	Butorides	virescens	Green heron	730	730	20		4	1		16		175	11.6				0.177714	0.412944	0.409342
Aves	Pelecaniformes	Ardeidae	Egretta	caerulea	Little blue heron	365	365	23		4	1				339.5	13.9				0.204486	0.414264	0.381251
Aves	Pelecaniformes	Ardeidae	Egretta	garzetta	Little egret	365	365								312	22.3				0.195169	0.525426	0.279405
Aves	Pelecaniformes	Ardeidae	Egretta	rufescens	Reddish egret	1461	1461			3	1				614	22				0.22488	0.482235	0.292885
Aves	Pelecaniformes	Ardeidae	Egretta	thula	Snowy egret	365	365	18		4	1		20		314	22.8				0.195184	0.530027	0.274789
Aves	Pelecaniformes	Ardeidae	Egretta	tricolor	Tricolored heron	669	669	21		4	1				309.9	17.7				0.197626	0.473946	0.328428
Aves	Pelecaniformes	Ardeidae	Ixobrychus	minutus	Little bittern	730	730								101	6.9				0.159909	0.328883	0.511208
Aves	Pelecaniformes	Ardeidae	Nycticorax	nycticorax	Black-crowned night heron	365	365	25		4	1		24.2		800	21.1				0.236928	0.457161	0.305911
Aves	Pelecaniformes	Balaenicipitidae	Balaeniceps	rex	Shoebill										5984	35.7				0.318497	0.455919	0.225584
Aves	Pelecaniformes	Pelecanidae	Pelecanus	crispus	Dalmation pelican										9550	35.3				0.339034	0.425666	0.235299
Aves	Pelecaniformes	Pelecanidae	Pelecanus	erythrorhynchos	American white pelican	1095	1095	36		2	1		110		6129	54				0.314613	0.547434	0.137953
Aves	Pelecaniformes	Pelecanidae	Pelecanus	occidentalis	Brown pelican	365	730	29		3	1		63.5		3115.8	43				0.287795	0.536404	0.175801
Aves	Pelecaniformes	Pelecanidae	Pelecanus	onocrotalus	White pelican										9520	51				0.334515	0.508481	0.157004
Aves	Pelecaniformes	Threskiornithidae	Bostrychia	hagedash	Hadada ibis										1238	16				0.259282	0.369131	0.371587
Aves	Pelecaniformes	Threskiornithidae	Eudocimus	albus	White ibis	730	730	22		3	1		36.3		940	27.6				0.240769	0.507904	0.251328
Aves	Pelecaniformes	Threskiornithidae	Eudocimus	ruber	Scarlet ibis			23		2					615	33.2				0.22005	0.57455	0.205399
Aves	Pelecaniformes	Threskiornithidae	Geronticus	eremita	Northern bald ibis										1202	32.9				0.249408	0.532769	0.217822
Aves	Pelecaniformes	Threskiornithidae	Nipponia	nippon	Japanese crested ibis										1900	25.8				0.272289	0.451023	0.276688
Aves	Pelecaniformes	Threskiornithidae	Phimosus	infuscatus	Whispering ibis										559	20				0.221919	0.466397	0.311684
Aves	Pelecaniformes	Threskiornithidae	Platalea	ajaja	Roseate spoonbill	1095	1095	23		3	1		50		1036.97	28				0.244883	0.505312	0.249805
Aves	Pelecaniformes	Threskiornithidae	Platalea	alba	African spoonbill										1521	17.9				0.266932	0.382121	0.350947
Aves	Pelecaniformes	Threskiornithidae	Platalea	flavipes	Yellow-billed spoonbill										1747.5	28.6				0.26741	0.479123	0.253467
Aves	Pelecaniformes	Threskiornithidae	Platalea	leucorodia	Eurasian spoonbill	1095	1095								1868	30.1				0.269712	0.486648	0.243641
Aves	Pelecaniformes	Threskiornithidae	Platalea	minor	Black-faced spoonbill										1228	15				0.259697	0.355119	0.385185
Aves	Pelecaniformes	Threskiornithidae	Plegadis	chihi	White-faced ibis	730	730	21		3.5	1		29.35		487.5	20.4				0.21571	0.47896	0.30533
Aves	Pelecaniformes	Threskiornithidae	Plegadis	falcinellus	Glossy ibis	1095	1095	21		3	1		166		431.2	26.8				0.207103	0.547516	0.245381
Aves	Pelecaniformes	Threskiornithidae	Plegadis	ridgwayi	Puna ibis										584	18				0.225084	0.440141	0.334775
Aves	Pelecaniformes	Threskiornithidae	Theristicus	caudatus	Buff-necked ibis										1726	22				0.269994	0.420938	0.309068
Aves	Pelecaniformes	Threskiornithidae	Threskiornis	aethiopicus	Sacred ibis										1530	37				0.258541	0.544835	0.196624
Aves	Pelecaniformes	Threskiornithidae	Threskiornis	molucca	Australian ibis										1806	33.2				0.267071	0.510663	0.222266
Aves	Pelecaniformes	Threskiornithidae	Threskiornis	spinicollis	Straw-necked ibis										1351.5	39.4				0.252378	0.566305	0.181317
Aves	Phaethontiformes	Phaethontidae	Phaethon	aethereus	Red-billed tropicbird			44		1					750	17.6				0.236271	0.420258	0.343471
Aves	Phaethontiformes	Phaethontidae	Phaethon	rubricauda	Red-tailed tropicbird	274	274	45		1	1		54		593.2	32.7				0.218656	0.573283	0.208061
Aves	Phoenicopteriformes	Phoenicopteridae	Phoeniconaias	minor	Lesser flamingo										1500	41				0.256454	0.569062	0.174484
Aves	Phoenicopteriformes	Phoenicopteridae	Phoenicopterus	chilensis	Chilean flamingo										2277	36.7				0.275993	0.519427	0.204581
Aves	Phoenicopteriformes	Phoenicopteridae	Phoenicopterus	roseus	Greater flamingo	1825	1825	30		1					2500	44				0.27791	0.554625	0.167464
Aves	Piciformes	Picidae	Colaptes	auratus	Northern flicker	365	365	11		4	1		5.48		120	12.5				0.160356	0.452101	0.387543
Aves	Piciformes	Picidae	Dendrocopos	leucotos	White-backed woodpecker										117	15.9				0.156386	0.507631	0.335983
Aves	Piciformes	Picidae	Dendrocopos	major	Great spotted woodpecker	365	365								75.1	12.7				0.13971	0.48346	0.37683
Aves	Piciformes	Picidae	Dendrocopos	medius	Middle spotted woodpecker	365	365								59	8				0.134682	0.393983	0.471335
Aves	Piciformes	Picidae	Dendrocopos	minor	Lesser spotted woodpecker	365	365								19.8	9.8				0.0846073	0.504311	0.411082
Aves	Piciformes	Picidae	Dendrocopos	syriacus	Syrian woodpecker										76.8	10.9				0.142507	0.44781	0.409683
Aves	Piciformes	Picidae	Dryocopus	martius	Black woodpecker	365	365								321	14				0.201955	0.419196	0.378849
Aves	Piciformes	Picidae	Dryocopus	pileatus	Pileated woodpecker	354	365	18		4	1				364	13				0.208324	0.395099	0.396577
Aves	Piciformes	Picidae	Jynx	torquilla	Eurasian wryneck	365	365								35	10				0.109232	0.475063	0.415705
Aves	Piciformes	Picidae	Melanerpes	carolinus	Red-bellied woodpecker	365	365	12		4	2		8		72.5	20.7				0.132354	0.595259	0.272387
Aves	Piciformes	Picidae	Melanerpes	erythrocephalus	Red-headed woodpecker	365	365	14		5	2				75	10				0.142498	0.429864	0.427638
Aves	Piciformes	Picidae	Melanerpes	formicivorus	Acorn woodpecker	694	766	14		4	2		4.7		79.7	17.2	0.737	73		0.138693	0.548048	0.313259
Aves	Piciformes	Picidae	Melanerpes	uropygialis	Gila woodpecker			14		4	2				65	11				0.135117	0.459754	0.405129
Aves	Piciformes	Picidae	Picoides	borealis	Red-cockaded woodpecker	240	240	11		3	1		3.2		56	16.1				0.124075	0.554136	0.321788
Aves	Piciformes	Picidae	Picoides	nuttallii	Nuttall's woodpecker										37.4	7.8				0.115086	0.415333	0.469581
Aves	Piciformes	Picidae	Picoides	pubescens	Downy woodpecker	365	365	12		5	1		1.67		25.6	11.9	0.383	21.7		0.0935088	0.532676	0.373815
Aves	Piciformes	Picidae	Picoides	tridactylus	Eurasian three-toed woodpecker and three-toed woodpecker										65.7	11.2				0.13537	0.463165	0.401465
Aves	Piciformes	Picidae	Picoides	villosus	Hairy woodpecker	365	365	14		4	1				62	15.9				0.128667	0.545293	0.32604
Aves	Piciformes	Picidae	Picus	viridis	Eurasian green woodpecker	365	365								176	15.2				0.174744	0.473305	0.351951
Aves	Piciformes	Picidae	Sphyrapicus	nuchalis	Red-naped sapsucker										48.5	4.9				0.131966	0.29552	0.572513
Aves	Piciformes	Picidae	Sphyrapicus	ruber	Red-breasted sapsucker										55	4.8				0.137702	0.283431	0.578867
Aves	Piciformes	Picidae	Sphyrapicus	varius	Yellow-bellied sapsucker	365	365	12		5	1		2.5		45	7.8				0.123161	0.404362	0.472477
Aves	Piciformes	Ramphastidae	Ramphastos	toco	Toco toucan			16							540	16.2				0.222919	0.421126	0.355954
Aves	Podicipediformes	Podicipedidae	Aechmophorus	occidentalis	Western grebe	365	365	23		3			30.7		1475.5	14				0.268533	0.328736	0.402731
Aves	Podicipediformes	Podicipedidae	Podiceps	cristatus	Great crested grebe	730	730								738.7	19.2				0.234572	0.440698	0.32473
Aves	Podicipediformes	Podicipedidae	Podiceps	grisegena	Red-necked grebe	365	365	22		4.5	1				1100	11				0.258586	0.291996	0.449418
Aves	Podicipediformes	Podicipedidae	Podiceps	nigricollis	Eared grebe	730	730	21		3					392	13.1				0.211468	0.392424	0.396108
Aves	Podicipediformes	Podicipedidae	Tachybaptus	ruficollis	Little grebe	365	365								174	17.5				0.172567	0.505626	0.321807
Aves	Procellariiformes	Diomedeidae	Diomedea	epomophora	Royal albatross										9000	58				0.330532	0.540696	0.128772
Aves	Procellariiformes	Diomedeidae	Diomedea	exulans	Wandering albatross										7046.7	50	20.3649	8130		0.32162	0.521876	0.156505
Aves	Procellariiformes	Diomedeidae	Phoebastria	immutabilis	Laysan albatross	3141	3068	64		1	1		167.2		3150	62	7.462	2522		0.283914	0.617934	0.0981525
Aves	Procellariiformes	Diomedeidae	Phoebastria	irrorata	Waved albatross										3395	40				0.292403	0.515073	0.192524
Aves	Procellariiformes	Diomedeidae	Phoebastria	nigripes	Black-footed albatross	1825	1825	65		1	1		182.5		2800	42.1				0.283383	0.537991	0.178626
Aves	Procellariiformes	Diomedeidae	Thalassarche	chlororhynchos	Yellow-nosed albatross										3890	37				0.299272	0.489494	0.211235
Aves	Procellariiformes	Diomedeidae	Thalassarche	chrysostoma	Grey-headed albatross										3753	47.2	8.5312	3753		0.294807	0.546297	0.158896
Aves	Procellariiformes	Diomedeidae	Thalassarche	melanophris	Black-browed albatross										3232	43.7				0.289201	0.537858	0.17294
Aves	Procellariiformes	Hydrobatidae	Hydrobates	pelagicus	European storm petrel	1095	1095	35		1					25.2	33.8				0.0803889	0.768042	0.151569
Aves	Procellariiformes	Hydrobatidae	Oceanodroma	castro	Harcourt's storm petrel	1826	1826	42		1	1		7.5		42	36				0.101935	0.751908	0.146157
Aves	Procellariiformes	Hydrobatidae	Oceanodroma	furcata	Fork-tailed storm petrel	1095	1095	52		1	1				45.2	18				0.113395	0.591894	0.294711
Aves	Procellariiformes	Hydrobatidae	Oceanodroma	homochroa	Ashy storm-petrel										36.9	31				0.098065	0.726006	0.175929
Aves	Procellariiformes	Hydrobatidae	Oceanodroma	leucorhoa	Leach's storm petrel	1826	1826	41		1	1		4.2		44.6	36				0.104557	0.748346	0.147098
Aves	Procellariiformes	Procellariidae	Bulweria	bulwerii	Bulwer's petrel	1461	1461	44		1	1		16.9		99	22.9	0.513975	87		0.144749	0.599465	0.255786
Aves	Procellariiformes	Procellariidae	Calonectris	diomedea	Cory's shearwater	1095	1095								535	24.8				0.217442	0.517307	0.265252
Aves	Procellariiformes	Procellariidae	Daption	capense	Cape petrel										408.6	25				0.205581	0.535095	0.259323
Aves	Procellariiformes	Procellariidae	Fulmarus	glacialis	Northern fulmar	2200	2200	55		1	1		65		908	51				0.231945	0.647845	0.12021
Aves	Procellariiformes	Procellariidae	Fulmarus	glacialoides	Southern fulmar										795	45				0.227634	0.627619	0.144747
Aves	Procellariiformes	Procellariidae	Macronectes	giganteus	Southern giant petrel										3697.5	13.5				0.309064	0.266087	0.424849
Aves	Procellariiformes	Procellariidae	Pagodroma	nivea	Snow petrel										268	46				0.179911	0.697042	0.123048
Aves	Procellariiformes	Procellariidae	Procellaria	parkinsoni	Black petrel										702.5	17				0.233828	0.416349	0.349823
Aves	Procellariiformes	Procellariidae	Pterodroma	alba	Phoenix Island petrel										259	11.3				0.195139	0.383809	0.421052
Aves	Procellariiformes	Procellariidae	Pterodroma	hypoleuca	Bonin Island petrel			49		1	1		7.7		168.6	30.8				0.164458	0.634447	0.201094
Aves	Procellariiformes	Procellariidae	Pterodroma	leucoptera	Gould's petrel										147.5	20				0.163765	0.545412	0.290823
Aves	Procellariiformes	Procellariidae	Pterodroma	sandwichensis	Hawaiian petrel										434	13.1				0.21591	0.386388	0.397702
Aves	Procellariiformes	Procellariidae	Puffinus	carneipes	Flesh-footed shearwater										690	30.2				0.226201	0.546457	0.227342
Aves	Procellariiformes	Procellariidae	Puffinus	griseus	Sooty shearwater										740	34				0.227843	0.568924	0.203233
Aves	Procellariiformes	Procellariidae	Puffinus	pacificus	Wedge-tailed shearwater	1461	1461	53		1	1		39		337.8	29				0.195508	0.579711	0.224781
Aves	Procellariiformes	Procellariidae	Puffinus	puffinus	Manx shearwater	1825	1643	51		1	1		45		434	50.9				0.199746	0.691184	0.10907
Aves	Procellariiformes	Procellariidae	Puffinus	tenuirostris	Short-tailed shearwater			53		1					499.4	39.9				0.208773	0.62818	0.163047
Aves	Psittaciformes	Psittacidae	Agapornis	fischeri	Fischer's loverbird										48.3	12.6				0.120538	0.507862	0.3716
Aves	Psittaciformes	Psittacidae	Agapornis	lilianae	Nyasa loverbird										37.3	19.2				0.104241	0.61778	0.277978
Aves	Psittaciformes	Psittacidae	Agapornis	pullarius	Red-faced loverbird										43	18				0.111217	0.594853	0.29393
Aves	Psittaciformes	Psittacidae	Agapornis	taranta	Black-winged loverbird										57.5	14.6				0.126394	0.530606	0.343
Aves	Psittaciformes	Psittacidae	Alisterus	scapularis	Australian king parrot										232.5	26.6				0.180231	0.582466	0.237303
Aves	Psittaciformes	Psittacidae	Amazona	aestiva	Blue-fronted amazon										451	49				0.201877	0.680362	0.117761
Aves	Psittaciformes	Psittacidae	Amazona	albifrons	White-fronted amazon										215	25.3				0.177413	0.575854	0.246733
Aves	Psittaciformes	Psittacidae	Amazona	amazonica	Orange-winged amazon										370	30				0.199079	0.581924	0.218997
Aves	Psittaciformes	Psittacidae	Amazona	autumnalis	Yellow-cheeked amazon										416	27				0.205448	0.551314	0.243238
Aves	Psittaciformes	Psittacidae	Amazona	festiva	Festive amazon										430	24.5				0.20805	0.527531	0.264419
Aves	Psittaciformes	Psittacidae	Amazona	finschi	Lilac-crowned amazon										302	25.8				0.192011	0.560098	0.247891
Aves	Psittaciformes	Psittacidae	Amazona	guildingii	St. Vincent amazon										646	28				0.224226	0.533379	0.242395
Aves	Psittaciformes	Psittacidae	Amazona	ochrocephala	Yellow-crowned amazon										430	56				0.198205	0.713177	0.088618
Aves	Psittaciformes	Psittacidae	Anodorhynchus	hyacinthinus	Hyacinth macaw										1330	38.8				0.251861	0.56381	0.184329
Aves	Psittaciformes	Psittacidae	Anodorhynchus	leari	Lear's macaw										940	38.3				0.236867	0.58148	0.181653
Aves	Psittaciformes	Psittacidae	Aprosmictus	erythropterus	Red-winged parrot										136	24.4				0.157854	0.594881	0.247265
Aves	Psittaciformes	Psittacidae	Ara	ambiguus	Great green macaw										1300	29				0.254332	0.499786	0.245882
Aves	Psittaciformes	Psittacidae	Ara	ararauna	Blue and yellow macaw										1030	43				0.239479	0.602051	0.158469
Aves	Psittaciformes	Psittacidae	Ara	chloropterus	Red and yellow macaw			28		2.5					1220	50.1				0.245049	0.62633	0.128621
Aves	Psittaciformes	Psittacidae	Ara	glaucogularis	Blue-throated macaw										784	22				0.235549	0.46774	0.296712
Aves	Psittaciformes	Psittacidae	Ara	macao	Scarlet macaw										1040	33				0.243053	0.542037	0.21491
Aves	Psittaciformes	Psittacidae	Ara	militaris	Military macaw										1134	46				0.242875	0.611492	0.145634
Aves	Psittaciformes	Psittacidae	Ara	rubrogenys	Red-fronted macaw										470	23				0.212685	0.508068	0.279247
Aves	Psittaciformes	Psittacidae	Ara	severus	Chestnut-fronted macaw										343	28.5				0.196382	0.574899	0.228719
Aves	Psittaciformes	Psittacidae	Aratinga	acuticaudata	Blue-crowned conure										171	31				0.164998	0.635062	0.199939
Aves	Psittaciformes	Psittacidae	Aratinga	auricapillus	Golden-capped conure										130	20.9				0.157728	0.562786	0.279485
Aves	Psittaciformes	Psittacidae	Aratinga	canicularis	Orange-fronted conure										85	16.2				0.142216	0.530778	0.327005
Aves	Psittaciformes	Psittacidae	Aratinga	erythrogenys	Red-masked conure										151	26.2				0.161573	0.60466	0.233767
Aves	Psittaciformes	Psittacidae	Aratinga	holochlora	Green conure										138	21.8				0.159833	0.568713	0.271455
Aves	Psittaciformes	Psittacidae	Barnardius	zonarius	Port Lincoln ringneck										150	17.9	0.718	137		0.16582	0.519503	0.314677
Aves	Psittaciformes	Psittacidae	Bolborhynchus	orbygnesius	Andean parakeet										43.1	9.2				0.119312	0.443992	0.436696
Aves	Psittaciformes	Psittacidae	Brotogeris	chiriri	Yellow-chevroned parakeet			26		5					61.6	19				0.126263	0.585677	0.28806
Aves	Psittaciformes	Psittacidae	Brotogeris	pyrrhoptera	Grey-cheeked parakeet										64	11.3				0.13412	0.466716	0.399164
Aves	Psittaciformes	Psittacidae	Brotogeris	sanctithomae	Tui parakeet										59	13.2				0.128718	0.506442	0.36484
Aves	Psittaciformes	Psittacidae	Brotogeris	tirica	Plain parakeet										63	11				0.133753	0.461607	0.404639
Aves	Psittaciformes	Psittacidae	Brotogeris	versicolurus	Canary-winged parakeet	730	730	25		5	1				71.6	10.3				0.140121	0.439253	0.420626
Aves	Psittaciformes	Psittacidae	Cacatua	alba	White cockatoo	2000	2000	30		2					570	26.9				0.21924	0.531802	0.248958
Aves	Psittaciformes	Psittacidae	Cacatua	ducorpsii	Ducorps's cockatoo										394	30.5				0.201625	0.581909	0.216466
Aves	Psittaciformes	Psittacidae	Cacatua	galerita	Sulphur-crested cockatoo			27		2					800	57	3.419	776.1		0.225093	0.680333	0.0945745
Aves	Psittaciformes	Psittacidae	Cacatua	goffiniana	Tanimbar cockatoo										275	26				0.187831	0.567386	0.244783
Aves	Psittaciformes	Psittacidae	Cacatua	haematuropygia	Philippine cockatoo										288	17.3				0.194699	0.47316	0.332141
Aves	Psittaciformes	Psittacidae	Cacatua	leadbeateri	Pink cockatoo										390	80				0.189695	0.799066	0.011239
Aves	Psittaciformes	Psittacidae	Cacatua	moluccensis	Rose-crested cockatoo										830	65.8				0.22499	0.710391	0.0646197
Aves	Psittaciformes	Psittacidae	Cacatua	ophthalmica	Blue-eyed cockatoo										492	31.9				0.210786	0.578814	0.2104
Aves	Psittaciformes	Psittacidae	Cacatua	pastinator	Western corella										637	26.3				0.224359	0.520145	0.255495
Aves	Psittaciformes	Psittacidae	Cacatua	sanguinea	Little corella										350	46.9				0.191332	0.685562	0.123107
Aves	Psittaciformes	Psittacidae	Cacatua	sulphurea	Yellow-crested cockatoo										340	49.7				0.189376	0.700303	0.110321
Aves	Psittaciformes	Psittacidae	Cacatua	tenuirostris	Long-billed corella										567	43				0.213423	0.637454	0.149123
Aves	Psittaciformes	Psittacidae	Callocephalon	fimbriatum	Gang-gang cockatoo										256	27.5				0.184038	0.584228	0.231734
Aves	Psittaciformes	Psittacidae	Calyptorhynchus	banksii	Banksian cockatoo										723.7	45.4				0.223427	0.635179	0.141393
Aves	Psittaciformes	Psittacidae	Calyptorhynchus	baudinii	Long-billed black cockatoo										620	47				0.216264	0.65213	0.131606
Aves	Psittaciformes	Psittacidae	Calyptorhynchus	funereus	Yellow-tailed black cockatoo										678.5	41				0.221826	0.616112	0.162062
Aves	Psittaciformes	Psittacidae	Chalcopsitta	atra	Black lory										260	17.5				0.190098	0.481807	0.328096
Aves	Psittaciformes	Psittacidae	Chalcopsitta	sintillata	Yellow-streaked lory										190	19.7				0.174997	0.527002	0.298002
Aves	Psittaciformes	Psittacidae	Charmosyna	papou	Papuan lorikeet										83	11.3				0.145467	0.451299	0.403234
Aves	Psittaciformes	Psittacidae	Conuropsis	carolinensis	Carolina parakeet			22		2.5	1				100	30				0.141972	0.659516	0.198512
Aves	Psittaciformes	Psittacidae	Coracopsis	nigra	Black parrot										193.5	34.1				0.169259	0.649135	0.181606
Aves	Psittaciformes	Psittacidae	Coracopsis	vasa	Vasa parrot										525	53.9				0.207373	0.692755	0.0998715
Aves	Psittaciformes	Psittacidae	Cyanoliseus	patagonus	Patagonian conure										278	19.5				0.191731	0.502138	0.306131
Aves	Psittaciformes	Psittacidae	Cyanopsitta	spixii	Spix's macaw										200	27				0.173481	0.594748	0.231771
Aves	Psittaciformes	Psittacidae	Cyanoramphus	auriceps	Yellow-fronted parakeet										46	9.3				0.122025	0.442558	0.435417
Aves	Psittaciformes	Psittacidae	Cyanoramphus	novaezelandiae	Red-fronted parakeet										92.6	12.4				0.149138	0.465669	0.385193
Aves	Psittaciformes	Psittacidae	Deroptyus	accipitrinus	Hawk-headed parrot										246	21.8				0.185065	0.534429	0.280506
Aves	Psittaciformes	Psittacidae	Diopsittaca	nobilis	Red-shouldered macaw										151	22.9				0.163176	0.574428	0.262396
Aves	Psittaciformes	Psittacidae	Eclectus	roratus	Eclectus parrot										440	28.5				0.207253	0.560129	0.232618
Aves	Psittaciformes	Psittacidae	Enicognathus	leptorhynchus	Slender-billed conure										193	15.3				0.178691	0.469309	0.352
Aves	Psittaciformes	Psittacidae	Eolophus	roseicapilla	Galah										300	40	1.248	268.7		0.186498	0.658966	0.154535
Aves	Psittaciformes	Psittacidae	Eos	bornea	Red lory										156	24.7				0.163697	0.589489	0.246815
Aves	Psittaciformes	Psittacidae	Eos	cyanogenia	Black-winged lory										167	18.1				0.170373	0.515631	0.313995
Aves	Psittaciformes	Psittacidae	Eunymphicus	cornutus	Horned parakeet										130	19.7				0.158432	0.549508	0.29206
Aves	Psittaciformes	Psittacidae	Forpus	coelestis	Pacific parrotlet										26.2	10.4				0.0961246	0.501045	0.40283
Aves	Psittaciformes	Psittacidae	Forpus	cyanopygius	Mexican parrotlet										33.5	10.5				0.106739	0.488618	0.404643
Aves	Psittaciformes	Psittacidae	Forpus	passerinus	Green-rumped parrotlet										24	11.6				0.0909959	0.53077	0.378235
Aves	Psittaciformes	Psittacidae	Glossopsitta	concinna	Musk lorikeet										70.8	11.5				0.138319	0.464668	0.397014
Aves	Psittaciformes	Psittacidae	Glossopsitta	porphyrocephala	Purple-crowned lorikeet										44	12				0.117049	0.502435	0.380516
Aves	Psittaciformes	Psittacidae	Graydidascalus	brachyurus	Short-tailed parrot										159	13.2				0.17199	0.447647	0.380362
Aves	Psittaciformes	Psittacidae	Guaruba	guarouba	Golden conure										250	23.2				0.185028	0.54745	0.267522
Aves	Psittaciformes	Psittacidae	Loriculus	galgulus	Blue-crowned hanging parrot										28	14.3				0.0952323	0.568619	0.336148
Aves	Psittaciformes	Psittacidae	Loriculus	philippensis	Colasisi										34.9	10.1				0.108989	0.477467	0.413544
Aves	Psittaciformes	Psittacidae	Loriculus	vernalis	Vernal hanging parrot										35.7	10.1				0.109978	0.476123	0.413899
Aves	Psittaciformes	Psittacidae	Lorius	domicella	Purple-naped lory										182	26				0.169814	0.591866	0.23832
Aves	Psittaciformes	Psittacidae	Lorius	garrulus	Chattering lory										143	26.6				0.159016	0.611291	0.229692
Aves	Psittaciformes	Psittacidae	Lorius	lory	Black-capped lory										177	18.5				0.172651	0.517091	0.310257
Aves	Psittaciformes	Psittacidae	Melopsittacus	undulatus	Budgerigar	180	180	18		5					30	21	0.3035	25.2	314.15	0.0936674	0.650821	0.255511
Aves	Psittaciformes	Psittacidae	Myiopsitta	monachus	Quaker parakeet	730	730	31		7	2		4.76		81.7	22.1	0.5189	80.4		0.136789	0.60287	0.260341
Aves	Psittaciformes	Psittacidae	Nandayus	nenday	Black-hooded conure										128	18.7				0.158376	0.538728	0.302896
Aves	Psittaciformes	Psittacidae	Neophema	chrysostoma	Blue-winged parrot										46.1	21				0.11242	0.625342	0.262238
Aves	Psittaciformes	Psittacidae	Neophema	pulchella	Turquoise parrot										41.4	21				0.107726	0.63172	0.260554
Aves	Psittaciformes	Psittacidae	Neophema	splendida	Scarlet-chested parrot										38.6	14				0.109498	0.544818	0.345684
Aves	Psittaciformes	Psittacidae	Neopsephotus	bourkii	Bourke's parrot										45	12.6				0.117449	0.512059	0.370492
Aves	Psittaciformes	Psittacidae	Nestor	notabilis	Kea										867.5	47				0.230926	0.632209	0.136866
Aves	Psittaciformes	Psittacidae	Northiella	haematogaster	Bluebonnet										86.2	15.3				0.143509	0.517111	0.33938
Aves	Psittaciformes	Psittacidae	Nymphicus	hollandicus	Cockatiel										90	35				0.135537	0.700382	0.164081
Aves	Psittaciformes	Psittacidae	Pionites	leucogaster	White-bellied parrot										155	26				0.162805	0.601389	0.235806
Aves	Psittaciformes	Psittacidae	Pionites	melanocephalus	Black-capped parrot										149	22.6				0.162751	0.572258	0.264991
Aves	Psittaciformes	Psittacidae	Pionopsitta	pileata	Pileated parrot										119	16.8				0.15647	0.518991	0.32454
Aves	Psittaciformes	Psittacidae	Pionus	maximiliani	Scaly-headed parrot										293	16.2				0.196233	0.457386	0.346382
Aves	Psittaciformes	Psittacidae	Pionus	menstruus	Blue-headed parrot										251	20.6				0.186618	0.520521	0.292861
Aves	Psittaciformes	Psittacidae	Platycercus	elegans	Crimson rosella										124.5	26.8				0.15288	0.62119	0.22593
Aves	Psittaciformes	Psittacidae	Platycercus	eximius	Eastern rosella										104	27.4				0.144763	0.636832	0.218405
Aves	Psittaciformes	Psittacidae	Platycercus	icterotis	Western rosella										63.3	13.2				0.131789	0.502269	0.365941
Aves	Psittaciformes	Psittacidae	Platycercus	venustus	Northern rosella										89.5	19.1				0.142507	0.5647	0.292793
Aves	Psittaciformes	Psittacidae	Poicephalus	cryptoxanthus	Brown-headed parrot										140	32.1				0.155852	0.654755	0.189392
Aves	Psittaciformes	Psittacidae	Poicephalus	gulielmi	Jardine's parrot										275	21				0.190374	0.519424	0.290201
Aves	Psittaciformes	Psittacidae	Poicephalus	meyeri	Brown parrot										117.5	34.2				0.14745	0.679377	0.173173
Aves	Psittaciformes	Psittacidae	Poicephalus	robustus	Brown-necked parrot										344	29.7				0.196018	0.583988	0.219994
Aves	Psittaciformes	Psittacidae	Poicephalus	rueppellii	Ruppel's parrot										116	34.3				0.146855	0.680795	0.172351
Aves	Psittaciformes	Psittacidae	Poicephalus	rufiventris	Red-breasted parrot										120	33.4				0.148651	0.672813	0.178536
Aves	Psittaciformes	Psittacidae	Poicephalus	senegalus	Senegal parrot										155	40				0.157675	0.698129	0.144196
Aves	Psittaciformes	Psittacidae	Polytelis	alexandrae	Alexandra's parrot										104	23.9				0.146391	0.606142	0.247468
Aves	Psittaciformes	Psittacidae	Polytelis	anthopeplus	Regent parrot										170	13.8				0.174381	0.453663	0.371956
Aves	Psittaciformes	Psittacidae	Polytelis	swainsonii	Superb parrot										153	15.1				0.16871	0.480128	0.351162
Aves	Psittaciformes	Psittacidae	Primolius	maracana	Blue-winged macaw										256	31				0.182611	0.611132	0.206257
Aves	Psittaciformes	Psittacidae	Probosciger	aterrimus	Palm cockatoo										841	56.3				0.227421	0.674594	0.0979848
Aves	Psittaciformes	Psittacidae	Psephotus	dissimilis	Hooded parrot										55	18				0.12196	0.580256	0.297784
Aves	Psittaciformes	Psittacidae	Psephotus	haematonotus	Red-rumped parrot										61.4	12.2				0.131397	0.486385	0.382218
Aves	Psittaciformes	Psittacidae	Psephotus	varius	Mulga parrot										61.5	11.8				0.131865	0.478802	0.389333
Aves	Psittaciformes	Psittacidae	Pseudeos	fuscata	Dusky lory										149	13.4				0.168976	0.454877	0.376147
Aves	Psittaciformes	Psittacidae	Psilopsiagon	aymara	Sierra parakeet										30	8.5				0.104439	0.447709	0.447852
Aves	Psittaciformes	Psittacidae	Psittacula	alexandri	Red-breasted parakeet										147	23.3				0.161798	0.579909	0.258293
Aves	Psittaciformes	Psittacidae	Psittacula	cyanocephala	Plum-headed parakeet										66	18.8				0.129401	0.579209	0.291391
Aves	Psittaciformes	Psittacidae	Psittacula	eupatria	Alexandrine parakeet										255	30				0.182831	0.604	0.213169
Aves	Psittaciformes	Psittacidae	Psittacula	krameri	Ring-necked parakeet										128	34				0.151256	0.672984	0.17576
Aves	Psittaciformes	Psittacidae	Psittaculirostris	desmarestii	Large fig parrot										117	14.9				0.157159	0.493044	0.349797
Aves	Psittaciformes	Psittacidae	Psittaculirostris	salvadorii	Salvadori's fig parrot										118	12				0.160109	0.44393	0.395961
Aves	Psittaciformes	Psittacidae	Psittacus	erithacus	African grey parrot										333	49.7				0.188468	0.701537	0.109996
Aves	Psittaciformes	Psittacidae	Psittrichas	fulgidus	Pesquet's parrot										865	25				0.238318	0.490616	0.271066
Aves	Psittaciformes	Psittacidae	Purpureicephalus	spurius	Red-capped parrot										116	15.3				0.156469	0.499502	0.344029
Aves	Psittaciformes	Psittacidae	Pyrrhura	perlata	Crimson-bellied conure										87	14.3				0.144717	0.501384	0.353899
Aves	Psittaciformes	Psittacidae	Rhynchopsitta	pachyrhyncha	Thick-billed parrot	730	730	26		3	1				360	33				0.196748	0.604953	0.1983
Aves	Psittaciformes	Psittacidae	Strigops	habroptila	Kakapo	3650	1825	30		2.5					1750	60				0.258648	0.645429	0.0959224
Aves	Psittaciformes	Psittacidae	Tanygnathus	megalorynchos	Great-billed parrot										325	23				0.196583	0.529946	0.273471
Aves	Psittaciformes	Psittacidae	Tanygnathus	sumatranus	Blue-backed parrot										270.5	14.4				0.194148	0.435674	0.370178
Aves	Psittaciformes	Psittacidae	Trichoglossus	euteles	Olive-headed lorikeet										73.7	16				0.136138	0.536449	0.327414
Aves	Psittaciformes	Psittacidae	Trichoglossus	haematodus	Rainbow lorikeet										115.1	16.1				0.155522	0.511409	0.333069
Aves	Psittaciformes	Psittacidae	Trichoglossus	johnstoniae	Mindana lorikeet										55.2	17.8				0.122252	0.577532	0.300216
Aves	Psittaciformes	Psittacidae	Triclaria	malachitacea	Purple-bellied parrot										90	11.9				0.148385	0.458115	0.3935
Aves	Psittaciformes	Psittacidae	Vini	peruviana	Blue lorikeet										29	18.4				0.0937617	0.62315	0.283088
Aves	Sphenisciformes	Spheniscidae	Aptenodytes	patagonicus	King penguin										13036.8	26	25.889	13270		0.356261	0.338538	0.305201
Aves	Sphenisciformes	Spheniscidae	Eudyptula	minor	Little penguin			39							1105	16				0.254321	0.375872	0.369807
Aves	Sphenisciformes	Spheniscidae	Spheniscus	demersus	Jackass penguin										3135	27.3				0.293474	0.434015	0.272511
Aves	Sphenisciformes	Spheniscidae	Spheniscus	magellanicus	Magellanic penguin	1040	1040	40		1					4000	30				0.302987	0.440743	0.25627
Aves	Strigiformes	Strigidae	Aegolius	acadicus	Northern saw-whet owl	365	365	27		5.5	1		7.5		117.9	17.5	0.654	124		0.155578	0.528709	0.315713
Aves	Strigiformes	Strigidae	Aegolius	funereus	Boreal owl	365	365	27		5	1		9		120	15.9				0.157491	0.50613	0.33638
Aves	Strigiformes	Strigidae	Asio	flammeus	Short-eared owl	365	365	25		6	1.5		16		406	21.8				0.206934	0.504716	0.28835
Aves	Strigiformes	Strigidae	Asio	otus	Long-eared owl	365	365	27		4.5	1		17.4		249.7	27.8	0.954	252		0.182821	0.588142	0.229036
Aves	Strigiformes	Strigidae	Athene	cunicularia	Burrowing owl	365	365	28		8	1.5		8.9		150	11				0.171618	0.410159	0.418222
Aves	Strigiformes	Strigidae	Athene	noctua	Little owl	365	365								169	11.1				0.176716	0.405119	0.418165
Aves	Strigiformes	Strigidae	Bubo	bubo	Eurasian eagle-owl	730	730								2686	68				0.275858	0.648128	0.0760135
Aves	Strigiformes	Strigidae	Bubo	scandiacus	Snowy owl	730	730	32		6	1		45		2042.5	28	4.2244	2026		0.274471	0.46511	0.260419
Aves	Strigiformes	Strigidae	Bubo	virginianus	Great horned owl	730	730	27		3	1		34.7		1191.2	29	5.2442	1450		0.250517	0.504969	0.244513
Aves	Strigiformes	Strigidae	Glaucidium	passerinum	Eurasian pygmy-owl	365	365								65.5	6				0.14267	0.32318	0.534149
Aves	Strigiformes	Strigidae	Megascops	asio	Eastern screech-owl	365	365	29		4	1		11		164.1	20.7	0.586	166		0.16801	0.546812	0.285178
Aves	Strigiformes	Strigidae	Megascops	kennicottii	Western screech-owl	365	365	30		4	1		14.05		205	19				0.178744	0.51437	0.306886
Aves	Strigiformes	Strigidae	Micrathene	whitneyi	Elf owl	365		24		2	1				41	14	0.259435	45.9		0.112131	0.541241	0.346628
Aves	Strigiformes	Strigidae	Otus	flammeolus	Flammulated owl	365	365	22		3	1		7.5		55.5	8.1				0.131865	0.4004	0.467735
Aves	Strigiformes	Strigidae	Otus	scops	Common or Eurasian scops-owl	365	365								92	6.8				0.156009	0.33114	0.512851
Aves	Strigiformes	Strigidae	Pulsatrix	perspicillata	Spectacled owl			36		2					770	25				0.23324	0.497516	0.269245
Aves	Strigiformes	Strigidae	Strix	aluco	Tawny owl	365	365								520	22.4				0.217413	0.496136	0.286451
Aves	Strigiformes	Strigidae	Strix	nebulosa	Great gray owl	365	365	30		2	1		37.5		1120	15.9				0.254984	0.373664	0.371352
Aves	Strigiformes	Strigidae	Strix	occidentalis	Spotted owl	365	365	30		2					588.7	25	2.675	571		0.221521	0.513438	0.265041
Aves	Strigiformes	Strigidae	Strix	uralensis	Ural owl	365	365								784.5	23.8				0.23464	0.485363	0.279997
Aves	Strigiformes	Strigidae	Strix	varia	Barred owl	730	730	28		2	1		46		715	24				0.230491	0.492743	0.276765
Aves	Strigiformes	Strigidae	Surnia	ulula	Northern hawk-owl			27		7	1		18		320	16.2				0.20008	0.452158	0.347762
Aves	Strigiformes	Tytonidae	Tyto	alba	Common barn-owl	365	365	33		6	2		15		580	34				0.217209	0.583372	0.199418
Aves	Struthioniformes	Struthionidae	Struthio	camelus	Ostrich										111000	50	69.6339	100000		0.441958	0.35837	0.199671
Aves	Suliformes	Anhingidae	Anhinga	anhinga	Anhinga	730	730	28		4					1080	16.4	3.2258	1040		0.253028	0.382774	0.364198
Aves	Suliformes	Anhingidae	Anhinga	melanogaster	Darter										1486.6	16				0.267269	0.358279	0.374452
Aves	Suliformes	Fregatidae	Fregata	andrewsi	Christmas Island frigatebird										1550	25.6				0.263495	0.46135	0.275155
Aves	Suliformes	Fregatidae	Fregata	ariel	Lesser frigatebird										806	27.6				0.234056	0.517025	0.24892
Aves	Suliformes	Fregatidae	Fregata	magnificens	Magnificent frigatebird	1826	1826	56		1	1				1078	34				0.244264	0.546612	0.209123
Aves	Suliformes	Fregatidae	Fregata	minor	Great frigatebird	1826	1826	56		1	1				1400	43				0.252876	0.583849	0.163275
Aves	Suliformes	Phalacrocoracidae	Phalacrocorax	aristotelis	Shag	1095	1095								1773	30.6				0.267237	0.493443	0.23932
Aves	Suliformes	Phalacrocoracidae	Phalacrocorax	auritus	Double-crested cormorant	730	730	24		4	1		31.15		1817	22.5	5.6096	1330		0.271969	0.422938	0.305093
Aves	Suliformes	Phalacrocoracidae	Phalacrocorax	brasilianus	Neotropic cormorant	365	365	26		3.5					1550	12.6				0.271937	0.302154	0.425908
Aves	Suliformes	Phalacrocoracidae	Phalacrocorax	carbo	Great cormorant	1460	1460	30		4	1		48.5		3628.8	27.2				0.299903	0.424516	0.275582
Aves	Suliformes	Phalacrocoracidae	Phalacrocorax	pelagicus	Pelagic cormorant	730	730	22		4			35		2041.2	17.8				0.279838	0.363417	0.356745
Aves	Suliformes	Phalacrocoracidae	Phalacrocorax	penicillatus	Brandt's cormorant	730	730	30		3	1		33		2426	18				0.287244	0.355684	0.357073
Aves	Suliformes	Sulidae	Morus	bassanus	Northern gannet	730	1095	43		1	1		80		2950	37.4				0.28707	0.508313	0.204617
Aves	Suliformes	Sulidae	Morus	serrator	Australian gannet										2350	33				0.278636	0.49369	0.227674
Aves	Suliformes	Sulidae	Sula	dactylatra	Masked booby	1461	1461	43		1.5			52.2		1739.2	25.5	5.5209	1289		0.268568	0.453641	0.277791
Aves	Suliformes	Sulidae	Sula	granti	Nazca booby										1754	21				0.271251	0.409537	0.319213
Aves	Suliformes	Sulidae	Sula	leucogaster	Brown booby	1278	1278	41		2	1				1134	27.2				0.249132	0.493498	0.25737
Aves	Suliformes	Sulidae	Sula	nebouxii	Blue-footed booby			41		2					1530	18				0.267123	0.383022	0.349855
Aves	Suliformes	Sulidae	Sula	sula	Red-footed booby	730	730	44		1	1		40		1017	23				0.246377	0.462291	0.291333
Aves	Tinamiformes	Tinamidae	Tinamus	solitarius	Solitary tinamou										1390.5	15				0.265121	0.347749	0.38713
Mammalia	Afrosoricida	Tenrecidae	Echinops	telfairi	Lesser hedgehog tenrec	365	365	55	29	6	1		7.67	50	180	19	0.75	116.4	307.85	0.173067	0.522083	0.304849	0.126596	0.39354	0.197906	0.281959
Mammalia	Afrosoricida	Tenrecidae	Hemicentetes	semispinosus	Streaked tenrec	35		59	21	4	2		11.5		180	2.7	0.38	116.4	308.15	0.196305	0.0839076	0.719787	0.115865	0.0703529	0.662987	0.150795
Mammalia	Afrosoricida	Tenrecidae	Microgale	dobsoni	Dobson's long-tailed tenrec	669	669	61	29	2.67			3.95		37.8	5.6	0.315	44.6	304.05	0.119497	0.34029	0.540214	0.131586	0.493386	0.179074	0.195953
Mammalia	Afrosoricida	Tenrecidae	Microgale	talazaci	Talazaci's long-tailed tenrec	639	639	61	29	2			3.6		50	5.8	0.243	44	303.95	0.131288	0.331581	0.537131	0.111331	0.463429	0.179641	0.245599
Mammalia	Afrosoricida	Tenrecidae	Setifer	setosus	Greater hedgehog tenrec	198	258	54	24	3	1		24.7		225	14.1	0.573	427.6	305.35	0.18636	0.441869	0.371772	0.204062	0.339272	0.340382	0.116284
Mammalia	Afrosoricida	Tenrecidae	Tenrec	ecaudatus	Tenrec	182		58	27	18	1.5		21	225	900	8.7	0.729	650	306.15	0.25262	0.251219	0.49616	0.120697	0.176886	0.379548	0.322869
Mammalia	Artiodactyla	Antilocapridae	Antilocapra	americana	Pronghorn	547	547	235	91	2	1	365	3000	8900	46100	15.5	50.973	34779.3	311.15	0.417552	0.147473	0.434976	0.366855	0.146807	0.357532	0.128806
Mammalia	Artiodactyla	Bovidae	Addax	nasomaculatus	Addax	1065		282	198	1	1	355	5600		92500	28				0.440905	0.238974	0.32012	0.399645	0.20606	0.247569	0.146725
Mammalia	Artiodactyla	Bovidae	Aepyceros	melampus	Impala	456	395	198	167	1	1	365	5550	15900	52500	25.6				0.41725	0.252441	0.330309	0.416779	0.168682	0.36789	0.0466487
Mammalia	Artiodactyla	Bovidae	Alcelaphus	buselaphus	Hartebeest	730		247	193	1	1	365	9050		159000	22.5				0.467154	0.157737	0.375108	0.408725	0.126909	0.329714	0.134653
Mammalia	Artiodactyla	Bovidae	Ammotragus	lervia	Aoudad	335		149	122	1.2	2	229	4500		92500	21.7				0.443941	0.181733	0.374326	0.369164	0.0729491	0.413749	0.144138
Mammalia	Artiodactyla	Bovidae	Antidorcas	marsupialis	Springbok	213	400	168	121	1	1	365	4160		39000	19.8			312.55	0.407335	0.212375	0.380289	0.397163	0.0967323	0.478647	0.0274577
Mammalia	Artiodactyla	Bovidae	Antilope	cervicapra	Blackbuck	466		168	60	1	1.9	231	3850		37500	23.9				0.403382	0.256965	0.339653	0.401209	0.183258	0.357486	0.058047
Mammalia	Artiodactyla	Bovidae	Bos	javanicus	Banteng	730	1095	295	304	1	1				700000	27.1			311.95	0.529634	0.111609	0.358757
Mammalia	Artiodactyla	Bovidae	Bison	bison	American bison	912	912	274	259	1	1	452	20000	158000	630000	33.5			311.85	0.52251	0.165469	0.312021	0.418466	0.0791877	0.29852	0.203826
Mammalia	Artiodactyla	Bovidae	Bison	bonasus	European bison	730	730	270	213	1	1	641	23375		610000	26.4			311.5	0.523939	0.113894	0.362167	0.427897	0.0523617	0.350315	0.169426
Mammalia	Artiodactyla	Bovidae	Bos	frontalis	Gaur	590	550	275	137	1	0.9	634	23000		825000	26.2				0.537208	0.0942804	0.368512	0.411066	0.00469541	0.378931	0.205307
Mammalia	Artiodactyla	Bovidae	Bos	grunniens	Yak	738	738	274	228	1	0.8		18000		667000	26.3			311.15	0.527883	0.107744	0.364373	0.402348	0.0362564	0.340293	0.221103
Mammalia	Artiodactyla	Bovidae	Bos	sauveli	Kouprey	730		260		1	1				800000	20				0.539081	0.0354657	0.425454
Mammalia	Artiodactyla	Bovidae	Boselaphus	tragocamelus	Nilgai	815	913	255		2	1	365	5875		180000	21.7				0.473	0.14225	0.384749	0.367887	0.109421	0.302812	0.219879
Mammalia	Artiodactyla	Bovidae	Bos	taurus	Domestic cattle	548		277		1	1				750000	20	306.77	347000	311.15	0.536264	0.0392932	0.424443
Mammalia	Artiodactyla	Bovidae	Bubalus	depressicornis	Anoa	730	730	300	225	1	1				155000	36.1				0.460412	0.26542	0.274169
Mammalia	Artiodactyla	Bovidae	Bubalus	bubalis	Water buffalo	502		311	228	1.375	1	365	37500		725000	34.9			311.25	0.528153	0.166333	0.305513	0.4597	0.0342123	0.397267	0.108822
Mammalia	Artiodactyla	Bovidae	Bubalus	mindorensis	Tamaraw	730		300		1	0.5	1095			240000	20				0.486529	0.106869	0.406603
Mammalia	Artiodactyla	Bovidae	Bubalus	quarlesi	Mountain anoa	730	730	295	270	1	1				150000	29.2				0.461507	0.219728	0.318766
Mammalia	Artiodactyla	Bovidae	Capra	caucasica	West Caucasian tur	730	1643	157	90	1			3850		70000	19.3				0.433172	0.171942	0.394887	0.37358	0.159503	0.311739	0.155178
Mammalia	Artiodactyla	Bovidae	Budorcas	taxicolor	Takin	730	730	210		1	1	365	6000		180000	21.9				0.472891	0.144311	0.382798	0.368873	0.100149	0.317725	0.213253
Mammalia	Artiodactyla	Bovidae	Capra	falconeri	Markhor	745	1080	163	167	2	1				41000	19.1				0.409947	0.201326	0.388727
Mammalia	Artiodactyla	Bovidae	Capra	cylindricornis	East Caucasian tur	1019	914	161	182	1.2	1		3787.5		50000	20.2				0.417942	0.202132	0.379926
Mammalia	Artiodactyla	Bovidae	Capra	nubiana	Nubian ibex	730	1643	150	90	1	1				46250	22.4				0.413308	0.229971	0.356721
Mammalia	Artiodactyla	Bovidae	Capra	hircus	Domestic goat	406	685	155	160	1.5	1	451	2250		61000	20.8			312.45	0.426273	0.196912	0.376815	0.331939	0.100855	0.367525	0.199681
Mammalia	Artiodactyla	Bovidae	Capra	ibex	Ibex	797	1256	169	274	1.1	0.8	489	2850		82500	20.9				0.439395	0.180083	0.380522	0.343075	0.147682	0.284214	0.225028
Mammalia	Artiodactyla	Bovidae	Capra	pyrenaica	Spanish ibex	548	1096	165		2					57500	16				0.426819	0.141497	0.431684
Mammalia	Artiodactyla	Bovidae	Capra	sibirica	Siberian ibex	730	1825	175	240	1	1		3640		130000	22.3				0.458471	0.167675	0.373854	0.342726	0.112019	0.299696	0.245559
Mammalia	Artiodactyla	Bovidae	Cephalophus	jentinki	Jentink's duiker			240	105	1			4581		70000.3	21				0.432166	0.190899	0.376935
Mammalia	Artiodactyla	Bovidae	Cephalophus	weynsi	Weyns's duiker										15000	15.2				0.368777	0.20967	0.421553
Mammalia	Artiodactyla	Bovidae	Connochaetes	gnou	Black wildebeest	763	1095	259	228	1	1		11000		132250	21.8				0.45949	0.161565	0.378945	0.433104	0.152181	0.332559	0.0821567
Mammalia	Artiodactyla	Bovidae	Cephalophus	dorsalis	Bay duiker	578		236		1			1610		11600	17.5				0.355879	0.256557	0.387563	0.38031	0.257421	0.320973	0.0412958
Mammalia	Artiodactyla	Bovidae	Damaliscus	hunteri	Hirola	1095	1460	283		1	1		8350		159000	15.17				0.471849	0.0692134	0.458938	0.400116	0.140066	0.299752	0.160067
Mammalia	Artiodactyla	Bovidae	Cephalophus	natalensis	Natal duiker			213		1		235	955		10000	15.2				0.351079	0.233717	0.415204
Mammalia	Artiodactyla	Bovidae	Cephalophus	niger	Black duiker			128		1			1940		18100	14.8				0.377295	0.19254	0.430165
Mammalia	Artiodactyla	Bovidae	Cephalophus	nigrifrons	Black-fronted duiker										13900	17.9				0.363505	0.250905	0.385589
Mammalia	Artiodactyla	Bovidae	Cephalophus	rufilatus	Red-flanked duiker	270	270	230		1			943		13000	15.2				0.362531	0.218157	0.419312	0.323213	0.147761	0.41528	0.113746
Mammalia	Artiodactyla	Bovidae	Cephalophus	silvicultor	Yellow-backed duiker			165	38	1	1	306	2400	20512.5	62000	22.5				0.426047	0.21359	0.360363
Mammalia	Artiodactyla	Bovidae	Damaliscus	lunatus	Topi	639	1095	238		1	0.6		11100		110000	23.6				0.450505	0.190306	0.359189	0.441863	0.156154	0.351284	0.0506985
Mammalia	Artiodactyla	Bovidae	Damaliscus	pygargus	Sassaby or blesbok	707		243	152	1		365	6792		84500	23				0.4393	0.200164	0.360536	0.413841	0.170093	0.322953	0.0931131
Mammalia	Artiodactyla	Bovidae	Connochaetes	taurinus	Blue wildebeest	411	912	253	278	1	1	365	18125		164500	24.3	230.073	196500	311.15	0.467722	0.173004	0.359274	0.460876	0.0977565	0.425155	0.0162126
Mammalia	Artiodactyla	Bovidae	Gazella	dama	Dama gazelle	639	365	208	105	1		365			73000	19.3		72999.5	312.35	0.435003	0.169453	0.395544
Mammalia	Artiodactyla	Bovidae	Gazella	granti	Grant's gazelle	251	1095	196	180	1	1		5602.5		67000	19.7				0.431015	0.179146	0.389839	0.398326	0.0754726	0.466804	0.0593971
Mammalia	Artiodactyla	Bovidae	Eudorcas	rufifrons	Red-fronted gazelle			175		1					15011	14.5				0.369371	0.199039	0.43159
Mammalia	Artiodactyla	Bovidae	Eudorcas	thomsonii	Thomson's gazelle	365		170	102	1	1.5	190	2600		25000	20				0.387806	0.241005	0.371189
Mammalia	Artiodactyla	Bovidae	Gazella	cuvieri	Cuvier's gazelle	349	180	171		1.5		274			17500	17.9				0.373558	0.237246	0.389195
Mammalia	Artiodactyla	Bovidae	Gazella	dorcas	Dorcas gazelle	730	589	182	82	1	1	338	1650	7000	14500	23.7			312.05	0.362007	0.31143	0.326563	0.378014	0.278763	0.269233	0.0739903
Mammalia	Artiodactyla	Bovidae	Gazella	gazella	Mountain gazelle	476		180	88	1	1.5	297	2360		23250	18.3			312.65	0.385696	0.22536	0.388944	0.379276	0.194299	0.356777	0.069648
Mammalia	Artiodactyla	Bovidae	Gazella	leptoceros	Rhim gazelle	157	540	176	90	1			4640		48500	14.6				0.420479	0.131029	0.448491	0.389849	0.0347437	0.544548	0.0308596
Mammalia	Artiodactyla	Bovidae	Gazella	subgutturosa	Goitered gazelle	646	746	175	106	1.3	1		2625	13500	48500	16.3			312.65	0.419167	0.155764	0.425068	0.355521	0.156547	0.327115	0.160818
Mammalia	Artiodactyla	Bovidae	Gazella	soemmerringii	Soemmering's gazelle	640	540	190	180	1					48500	15.5				0.419767	0.144463	0.435771
Mammalia	Artiodactyla	Bovidae	Hemitragus	jemlahicus	Himalayan tahr	547	730	183	151	1	1	365	2000		35200	21.8				0.401715	0.240065	0.35822	0.350188	0.175839	0.320235	0.153739
Mammalia	Artiodactyla	Bovidae	Hippotragus	equinus	Roan antelope	730	814	284	183	1		331	15167		225000	25.9				0.480633	0.16875	0.350617	0.437333	0.122922	0.337264	0.102481
Mammalia	Artiodactyla	Bovidae	Hippotragus	niger	Sable antelope	768	1184	271	213	1	1	365	16375		225000	22.2				0.482469	0.134132	0.383399	0.442023	0.121536	0.343715	0.0927254
Mammalia	Artiodactyla	Bovidae	Kobus	ellipsiprymnus	Waterbuck	771		264	213	1	1	365	9000		175333	30	148.949	100000	311.85	0.467996	0.216543	0.315461	0.408032	0.140093	0.302163	0.149713
Mammalia	Artiodactyla	Bovidae	Kobus	kob	Kob	403	365	251	189	1	1.3		5405	31600	105000	21.9				0.449364	0.176276	0.374359	0.380078	0.0865519	0.394359	0.139011
Mammalia	Artiodactyla	Bovidae	Hemitragus	hylocrius	Nilgiri tahr	669	480	188	152	1		246			75000	17.3				0.437486	0.143282	0.419232
Mammalia	Artiodactyla	Bovidae	Kobus	megaceros	Nile lechwe	730	730	235		1	1	353	5100		90000	21.1				0.443079	0.177061	0.379859	0.386494	0.152639	0.314967	0.1459
Mammalia	Artiodactyla	Bovidae	Kobus	leche	Lechwe	898	1050	229	137	1			5100		94800	25.4				0.443138	0.215632	0.34123	0.3882	0.178679	0.274165	0.158955
Mammalia	Artiodactyla	Bovidae	Madoqua	guentheri	Gunther's dik-dik			178	84	1	2		681.67	2825.5	4550	17.5			310.95	0.315029	0.312061	0.37291
Mammalia	Artiodactyla	Bovidae	Madoqua	kirkii	Kirk's dik-dik	213	304	172	71	1	2	244	600	1780	5000	17.3	11.966	4290	312.15	0.319283	0.303886	0.376831	0.329214	0.1999	0.423194	0.047692
Mammalia	Artiodactyla	Bovidae	Naemorhedus	baileyi	Red goral			213		1.5					28863	19				0.394688	0.220965	0.384347
Mammalia	Artiodactyla	Bovidae	Naemorhedus	caudatus	Chinese goral										27000	20.3				0.390987	0.239784	0.369228
Mammalia	Artiodactyla	Bovidae	Naemorhedus	goral	Goral	500	500	215		1	1	365	2000		31750	17.6				0.399761	0.198122	0.402117	0.351358	0.163827	0.347225	0.13759
Mammalia	Artiodactyla	Bovidae	Litocranius	walleri	Gerenuk	359	548	204	241	1		241			43500	17.3				0.413709	0.175588	0.410703
Mammalia	Artiodactyla	Bovidae	Naemorhedus	crispus	Japanese serow	1095	1095	215	150	1	1		3510.5		80000	24				0.436404	0.212967	0.350629	0.365965	0.196072	0.238832	0.199131
Mammalia	Artiodactyla	Bovidae	Naemorhedus	sumatraensis	Serow	912	1004	213	165	1	1		3500		95000	18.5				0.447005	0.144324	0.408671	0.353051	0.148433	0.281419	0.217097
Mammalia	Artiodactyla	Bovidae	Neotragus	moschatus	Suni	183	183	180		1					6500	13.5				0.333688	0.23263	0.433682
Mammalia	Artiodactyla	Bovidae	Neotragus	pygmaeus	Royal antelope			183		1					2250	11.1				0.289714	0.251588	0.458698
Mammalia	Artiodactyla	Bovidae	Oreamnos	americanus	Mountain goat	912	912	184	122	1.2	1	365	3200		90000	20.8	46.414	32000		0.44325	0.173846	0.382905	0.349664	0.156787	0.270271	0.223278
Mammalia	Artiodactyla	Bovidae	Oreotragus	oreotragus	Klipspringer	365	365	196	137	1	1	365	1130		12000	25.9				0.35269	0.342587	0.304723	0.351127	0.22078	0.343747	0.0843457
Mammalia	Artiodactyla	Bovidae	Oryx	dammah	Scimitar-horned oryx	639	639	247	105	1		332	10317		177500	27.5				0.469569	0.196274	0.334157	0.416101	0.120797	0.338106	0.124996
Mammalia	Artiodactyla	Bovidae	Oryx	gazella	Gemsbok	550	550	270		1	1.3		12000		170000	23.8			312.05	0.469405	0.166384	0.364211	0.427433	0.107126	0.37345	0.0919912
Mammalia	Artiodactyla	Bovidae	Oryx	leucoryx	Arabian oryx	794		243	137	1	1				121350	20.8			311.65	0.456295	0.156121	0.387584
Mammalia	Artiodactyla	Bovidae	Ourebia	ourebi	Oribi	304	426	193	137	1	1.5	185	2235		17000	15.9				0.373704	0.212358	0.413938	0.383639	0.168593	0.425185	0.0225828
Mammalia	Artiodactyla	Bovidae	Ovibos	moschatus	Muskox	1096	1278	258	213	1	0.8	608	11460		315000	27.4			310.85	0.494649	0.161438	0.343913	0.402899	0.125968	0.269095	0.202038
Mammalia	Artiodactyla	Bovidae	Ovis	ammon	Argali	403	823	170	135	1	1	365	3400		160000	16.8				0.470907	0.0917609	0.437332	0.31927	0.0182966	0.397082	0.265351
Mammalia	Artiodactyla	Bovidae	Ovis	aries	Domestic sheep or mouflon	548	914	146	182	1.58	1	365	2370	17500	80000	22.8			311.95	0.437015	0.201448	0.361537
Mammalia	Artiodactyla	Bovidae	Ovis	canadensis	Bighorn sheep	707	749	180	152	1	1	365	4400	28000	70275	20.6	114.674	67030.8	311.15	0.432566	0.186348	0.381086	0.385006	0.16455	0.316021	0.134423
Mammalia	Artiodactyla	Bovidae	Ovis	dalli	Dall's sheep	684	639	173	129	1	1	365	2819		73100	19.6				0.434879	0.172835	0.392285	0.345623	0.139478	0.308931	0.205969
Mammalia	Artiodactyla	Bovidae	Philantomba	maxwellii	Maxwell's duiker	730		120	61	1	1		832		7000	18.3				0.3333	0.296551	0.370149
Mammalia	Artiodactyla	Bovidae	Philantomba	monticola	Blue duiker	487	685	193		1		265	800		6250	15.9	10.075	4200	312.55	0.330028	0.271702	0.398271
Mammalia	Artiodactyla	Bovidae	Procapra	gutturosa	Mongolian gazelle	532		185		1.3	1	365	2900		30000	12				0.401847	0.115477	0.482676	0.380006	0.165535	0.377996	0.0764635
Mammalia	Artiodactyla	Bovidae	Pseudois	nayaur	Bharal	730	730	160	182	2					55000	20.9				0.421697	0.204129	0.374174
Mammalia	Artiodactyla	Bovidae	Raphicerus	campestris	Steenbok	238	243	197	91	1		215	920		13000	9.3	20.619	9600	312.55	0.368382	0.107831	0.523788	0.313736	0.106373	0.465572	0.114319
Mammalia	Artiodactyla	Bovidae	Redunca	arundinum	Southern reedbuck	730	1095	224		1		376	4500		58000	16.8				0.426615	0.151941	0.421444	0.393156	0.173304	0.326665	0.106875
Mammalia	Artiodactyla	Bovidae	Redunca	fulvorufula	Mountain reedbuck	388	335	216		1	1.1	353	3000		30000	15				0.39919	0.165588	0.435222	0.383239	0.149437	0.406166	0.0611578
Mammalia	Artiodactyla	Bovidae	Redunca	redunca	Bohar reedbuck	502	502	228		1					45500	18				0.415199	0.18183	0.402971
Mammalia	Artiodactyla	Bovidae	Rupicapra	rupicapra	Chamois	674	669	122	76	1	1	365	2400		37500	17.6				0.407026	0.188251	0.404723	0.361169	0.184303	0.313098	0.14143
Mammalia	Artiodactyla	Bovidae	Sylvicapra	grimmia	Bush duiker	255	255	165	191	1	1.4	245	1612		18500	15.4				0.377775	0.200168	0.422057	0.351072	0.131115	0.440065	0.0777475
Mammalia	Artiodactyla	Bovidae	Syncerus	caffer	African buffalo	1475	1674	331	289	1	0.4	635	44000	166000	700000	29.8				0.528503	0.132938	0.338559	0.480888	0.136868	0.268406	0.113838
Mammalia	Artiodactyla	Bovidae	Taurotragus	derbianus	Giant eland	1107	730	264	150	1					680000	20.3				0.53181	0.0484476	0.419743
Mammalia	Artiodactyla	Bovidae	Taurotragus	oryx	Eland	589	571	274	182	1		340	32000		500000	26.1	190.209	141404	309.65	0.515395	0.123121	0.361484	0.460964	0.059471	0.390643	0.0889224
Mammalia	Artiodactyla	Bovidae	Tetracerus	quadricornis	Four-horned antelope	365		212		1.5		316	1044		19000	17.4				0.377485	0.226007	0.396508	0.318503	0.154971	0.368625	0.157901
Mammalia	Artiodactyla	Bovidae	Tragelaphus	angasii	Nyala	452		224	213	1	1.2	295	5232.5		120000	18.5				0.457202	0.130469	0.412329	0.370028	0.0750033	0.3895	0.165468
Mammalia	Artiodactyla	Bovidae	Tragelaphus	eurycerus	Bongo	806	914	288	180	1	0.7		19800		307500	21.9				0.496266	0.112551	0.391183	0.443677	0.104831	0.344491	0.107001
Mammalia	Artiodactyla	Bovidae	Tragelaphus	imberbis	Lesser kudu	504	504	235	274	1	1.3	259	6000		82500	19.8				0.440039	0.167941	0.39202	0.40008	0.126768	0.374791	0.0983602
Mammalia	Artiodactyla	Bovidae	Tragelaphus	scriptus	Bushbuck	496	365	188		1	1.5	236	3800		60000	15.3				0.429209	0.128927	0.441864	0.373412	0.122028	0.379533	0.125027
Mammalia	Artiodactyla	Bovidae	Tragelaphus	spekii	Sitatunga	401	548	242		1	1	353	4000		87500	22.6				0.441032	0.194155	0.364814	0.363937	0.0932245	0.38274	0.160099
Mammalia	Artiodactyla	Bovidae	Tragelaphus	strepsiceros	Greater kudu	517		228	183	1	1	365	15000		217500	23.5			312.05	0.480311	0.148923	0.370766	0.433965	0.0868366	0.390138	0.0890611
Mammalia	Artiodactyla	Camelidae	Camelus	bactrianus	Bactrian camel	1278	1278	395	319	1	0.5	730	36000		475000	35.4				0.509527	0.194606	0.295867	0.483106	0.159845	0.269076	0.0879726
Mammalia	Artiodactyla	Camelidae	Camelus	dromedarius	Dromedary	1095	2191	405	500	1	0.7	607	37000	253484	434000	28.4	224.779	407000	310.65	0.50821	0.150482	0.341308	0.485355	0.141114	0.306143	0.0673882
Mammalia	Artiodactyla	Camelidae	Lama	glama	Llama	800	800	330	152	1	1		11000		140000	28.9	148.94	115000	311.45	0.458618	0.2215	0.319881	0.43459	0.168082	0.306584	0.0907442
Mammalia	Artiodactyla	Camelidae	Lama	guanicoe	Guanaco	365	730	335	345	1	0.5		11500		127500	33.7			311.15	0.452706	0.261553	0.285741	0.438332	0.111579	0.403157	0.0469324
Mammalia	Artiodactyla	Camelidae	Vicugna	pacos	Alpaca	432	500	345	213	1.04			7210		62000	25.8			312.25	0.424417	0.244324	0.331258
Mammalia	Artiodactyla	Camelidae	Vicugna	vicugna	Vicugna	730	730	340	213	1	0.7	548	5740		50000	31.6			313.05	0.412613	0.30262	0.284767	0.428244	0.231335	0.291005	0.0494167
Mammalia	Artiodactyla	Cervidae	Axis	axis	Chital	766	913	226	122	1.03		426	3144		36000	20.8			312.35	0.403255	0.228187	0.368558	0.388471	0.219234	0.293356	0.0989388
Mammalia	Artiodactyla	Cervidae	Axis	calamianensis	Calamian deer	300	300	224	180	2					40500	17.2				0.410659	0.178524	0.410817
Mammalia	Artiodactyla	Cervidae	Axis	kuhlii	Bawean deer			227		1	1.3				55000	17.8				0.423609	0.168075	0.408317
Mammalia	Artiodactyla	Cervidae	Axis	porcinus	Hog deer	304	300	232	182	1	1		2532		43000	22.9				0.409865	0.23925	0.350886	0.356538	0.11331	0.40387	0.126282
Mammalia	Artiodactyla	Cervidae	Blastocerus	dichotomus	Marsh deer	365	365	270	180	1	1		4200		102500	11.17				0.456331	0.0265134	0.517156	0.350775	0.0313478	0.445979	0.171898
Mammalia	Artiodactyla	Cervidae	Capreolus	capreolus	Western roe deer	413	655	153	89	1.6	1	365	1010	8692.5	21666.7	17.5	46.347	21500	311.15	0.38315	0.219505	0.397346	0.310857	0.154534	0.35044	0.184169
Mammalia	Artiodactyla	Cervidae	Capreolus	pygargus	Eastern roe deer	365	1095	294	137	2	1		1750	28750	39450	18				0.408971	0.190291	0.400738	0.328304	0.11143	0.38353	0.176736
Mammalia	Artiodactyla	Cervidae	Cervus	elaphus	Red deer	852	730	245	156	1	0.9		10100	56500	200000	31.5	112.43	67000	308.35	0.473161	0.219693	0.307146	0.412978	0.145059	0.289172	0.152791
Mammalia	Artiodactyla	Cervidae	Cervus	nippon	Sika deer	500	500	210	172	1	1		5750	28590	42000	26.3			312.95	0.407189	0.271733	0.321078	0.430916	0.199724	0.354839	0.0145206
Mammalia	Artiodactyla	Cervidae	Dama	dama	Fallow deer	487	507	233	183	1	1	365	4500	22570	70000	21.1				0.43211	0.191966	0.375925	0.384411	0.131393	0.365339	0.118857
Mammalia	Artiodactyla	Cervidae	Elaphodus	cephalophus	Tufted deer	639	730	180		1					33500	22.7				0.399072	0.252086	0.348842
Mammalia	Artiodactyla	Cervidae	Elaphurus	davidianus	Pere David's deer	821	1186	288	167	1	1	360	11000		186500	27.5				0.471728	0.193341	0.334932	0.421111	0.142721	0.306487	0.12968
Mammalia	Artiodactyla	Cervidae	Cervus	albirostris	Thorold's deer	730	450	253	300	1	1				135000	21.3				0.460665	0.155133	0.384202
Mammalia	Artiodactyla	Cervidae	Cervus	alfredi	Visayan spotted deer			240	180	1	1				47500	18.5				0.41675	0.185431	0.397818
Mammalia	Artiodactyla	Cervidae	Hydropotes	inermis	Chinese water deer	183		190		2.7			1042		11500	13.9			311.45	0.358244	0.20535	0.436406	0.332769	0.11953	0.477281	0.07042
Mammalia	Artiodactyla	Cervidae	Mazama	americana	Red brocket	395	365	225	182	1.3	1		538.5		33000	17.1				0.40179	0.18936	0.40885	0.239272	0.0902773	0.336788	0.333663
Mammalia	Artiodactyla	Cervidae	Mazama	gouazoubira	Gray brocket	395	365	212		1			919		17000	14.8				0.374558	0.196258	0.429184
Mammalia	Artiodactyla	Cervidae	Muntiacus	muntjak	Indian muntjac	272	332	210	61	1.17		241	1223		21000	18.8				0.380932	0.23745	0.381618	0.325688	0.128137	0.408187	0.137988
Mammalia	Artiodactyla	Cervidae	Muntiacus	reevesi	Reeves's muntjac	274		199		1	1.5	215	1050		18000	23.2				0.371699	0.293818	0.334483	0.322947	0.149093	0.387484	0.140476
Mammalia	Artiodactyla	Cervidae	Odocoileus	hemionus	Mule deer	478	503	207	132	1.5	1	365	2950	23100	57000	22			313.15	0.422645	0.21353	0.363825	0.35936	0.135119	0.350767	0.154754
Mammalia	Artiodactyla	Cervidae	Odocoileus	virginianus	White-tailed deer	309	417	198	129	2	1	304	3000	36000	87000	23	123.447	61862.5	312.15	0.440573	0.198435	0.360993	0.338673	0.0597204	0.406949	0.194658
Mammalia	Artiodactyla	Cervidae	Ozotoceros	bezoarticus	Pampas deer	365		213	167	1	1	330	2100		32500	21.9			310.65	0.398177	0.245826	0.355998	0.354704	0.146043	0.376084	0.123169
Mammalia	Artiodactyla	Cervidae	Cervus	duvaucelii	Barasingha	1095		250	210	1	1				170000	24.5				0.46906	0.172894	0.358046
Mammalia	Artiodactyla	Cervidae	Pudu	puda	Southern pudu	274	320	200	61	1			900		10000	18.3				0.348868	0.275398	0.375734	0.333843	0.181121	0.398883	0.0861532
Mammalia	Artiodactyla	Cervidae	Rangifer	tarandus	Caribou and reindeer	662	680	228	120	1	1	365	6500	20000	101250	21.8	119.66	85000	310.35	0.447832	0.177405	0.374763	0.400781	0.143415	0.334022	0.121782
Mammalia	Artiodactyla	Cervidae	Cervus	mariannus	Philippine brown deer					1					50000	17.4				0.419719	0.168623	0.411658
Mammalia	Artiodactyla	Cervidae	Rucervus	eldii	Eld's deer	508		241	240	1	1	372	4750		122500	20.5				0.45688	0.152299	0.390821
Mammalia	Artiodactyla	Cervidae	Cervus	timorensis	Timor deer	464	630	251	228	1	1	366			63000	21.1				0.427511	0.198214	0.374275
Mammalia	Artiodactyla	Cervidae	Cervus	unicolor	Sambar	650	730	232	213	1	1		10000		185000	26.4				0.471861	0.184652	0.343486	0.411249	0.11537	0.337583	0.135798
Mammalia	Artiodactyla	Cervidae	Hippocamelus	antisensis	Guemals	480		255		1					45000	10.6				0.421023	0.0635719	0.515405
Mammalia	Artiodactyla	Cervidae	Hippocamelus	bisulcus	Chilean guemal	180	180	198	135	1	1		3576		70000	14				0.436995	0.0998443	0.463161	0.352244	0.00433273	0.5202	0.123223
Mammalia	Artiodactyla	Giraffidae	Giraffa	camelopardalis	Giraffe	1278	1644	457	152	1	0.5	620	58500		800000	39.5			310.25	0.530976	0.1883	0.280724	0.500854	0.137819	0.277717	0.0836102
Mammalia	Artiodactyla	Giraffidae	Okapia	johnstoni	Okapi	578	790	458	194	1	0.8		16000	77000	225000	33.5			311.22	0.477569	0.226532	0.2959	0.443274	0.117352	0.352649	0.0867248
Mammalia	Artiodactyla	Hippopotamidae	Hexaprotodon	liberiensis	Pygmy hippopotamus	1278	1644	199	198	1	0.4		4900		215000	42.3				0.472807	0.281607	0.245587	0.357172	0.169305	0.189687	0.283836
Mammalia	Artiodactyla	Hippopotamidae	Hippopotamus	amphibius	Hippopotamus	1279	1279	234	341	1	0.6	563	40000	237500	3750000	61.2			308.55	0.593194	0.195005	0.211801	0.405088	0.0154527	0.234102	0.345357
Mammalia	Artiodactyla	Suidae	Babyrousa	babyrussa	Babirusa	548	548	153	213	1.3	2		715		71500	22.9				0.43206	0.209093	0.358847	0.233907	0.0811475	0.281791	0.403155
Mammalia	Artiodactyla	Suidae	Phacochoerus	africanus	Wart hog	578	578	164	84	3	1.5	426	660		100000	20.9				0.447791	0.168674	0.383534	0.21129	0.0489499	0.278198	0.461562
Mammalia	Artiodactyla	Suidae	Potamochoerus	porcus	Red river hog	1096	1096	122	91	3		365	775		88000	22				0.441601	0.187774	0.370625	0.23605	0.12991	0.193856	0.440185
Mammalia	Artiodactyla	Suidae	Sus	barbatus	Bearded pig	450	540	122	105	4	1				102750	16.2				0.452009	0.109859	0.438132
Mammalia	Artiodactyla	Suidae	Sus	salvanius	Pygmy hog	700	700	108		3			191.5		8000	14				0.342318	0.228482	0.429199	0.220377	0.220594	0.239031	0.319999
Mammalia	Artiodactyla	Suidae	Sus	scrofa	Wild boar	334	768	115	56	7	1.5	230	960	5700	130000	27	104.15	135000	312.15	0.456193	0.210624	0.333183	0.229273	0.00157915	0.346875	0.422273
Mammalia	Artiodactyla	Suidae	Sus	verrucosus	Javan pig	274	1825	120	105	6	1		1000		76000	17				0.438272	0.138568	0.423159	0.249395	0.00399595	0.407167	0.339442
Mammalia	Artiodactyla	Tayassuidae	Pecari	tajacu	Collared peccary	329	358	145	49	2	2	155	700	4881	20200	31.5	33.165	20500	310.65	0.37309	0.35566	0.27125	0.289761	0.160071	0.327914	0.222255
Mammalia	Artiodactyla	Tayassuidae	Tayassu	pecari	White-lipped peccary	548	548	158	50	2			700		22000	28.5			311.65	0.378008	0.328122	0.29387	0.288591	0.195674	0.266103	0.249632
Mammalia	Artiodactyla	Tragulidae	Moschiola	meminna	Indian spotted chevrotain			150		1.5			319		2450	14.5				0.290249	0.306543	0.403209
Mammalia	Artiodactyla	Tragulidae	Tragulus	javanicus	Lesser mouse-deer	167	167	144	84	1			370		2850	14	4.883	1615.5	311.55	0.297268	0.289694	0.413039	0.310235	0.196358	0.454502	0.0389052
Mammalia	Artiodactyla	Tragulidae	Tragulus	napu	Greater mouse-deer	137	135	153	91	1	1	152	373		6500	16.7				0.331155	0.2804	0.388445	0.274189	0.116132	0.469048	0.140631
Mammalia	Carnivora	Ailuridae	Ailurus	fulgens	Lesser panda	550	550	116	137	2	1	365	100	1140	4325	19	4.898	5740	310.75	0.311836	0.333537	0.354627	0.196906	0.245978	0.228545	0.32857
Mammalia	Carnivora	Canidae	Atelocynus	microtis	Small-eared dog										9500	11.9				0.351755	0.181794	0.466451
Mammalia	Carnivora	Canidae	Canis	adustus	Side-striped jackal	274	274	64	42	4	2				10250	13.7				0.353394	0.20892	0.437686
Mammalia	Carnivora	Canidae	Canis	aureus	Golden jackal	334	334	63	75	3	1	365	207.5		11000	18.8			311.95	0.352708	0.275799	0.371493	0.210552	0.141941	0.320895	0.326613
Mammalia	Carnivora	Canidae	Canis	familiaris	Domestic dog	510	510	63	63	6		180			40000	24				0.406149	0.254075	0.339776
Mammalia	Carnivora	Canidae	Canis	latrans	Coyote	274	274	63	60	6	1	365	250	1517	13250	21.8	19.423	10148.9	310.15	0.359068	0.29801	0.342922	0.217827	0.121891	0.343531	0.316751
Mammalia	Carnivora	Canidae	Canis	lupus	Gray wolf	669	669	62	47	6	0.8	365	450	5250	26625	20.6			311.45	0.390202	0.243908	0.365889	0.240834	0.163884	0.246853	0.34843
Mammalia	Carnivora	Canidae	Canis	mesomelas	Black-backed jackal	309	251	60	60	4	1	274	159		10250	16.7	21.533	7720	311.15	0.351036	0.253387	0.395577	0.18966	0.124458	0.330652	0.35523
Mammalia	Carnivora	Canidae	Cerdocyon	thous	Crab-eating fox	274	274	55	90	4	1.9	243	140		6500	12.7	8.502	5444	311.35	0.334416	0.218911	0.446673	0.195331	0.132288	0.361668	0.310712
Mammalia	Carnivora	Canidae	Chrysocyon	brachyurus	Maned wolf	730		64	227	3			368		21500	16.8				0.383299	0.210795	0.405906	0.231989	0.171991	0.242525	0.353496
Mammalia	Carnivora	Canidae	Cuon	alpinus	Dhole	365	365	61	58	5	1	365	275	2350	15750	16.1				0.370222	0.219695	0.410084	0.216108	0.120076	0.329123	0.334693
Mammalia	Carnivora	Canidae	Lycalopex	culpaeus	Culpeo	365		61	61	4	1	365	168		13000	13.1				0.364302	0.184767	0.450931	0.181522	0.107577	0.326885	0.384016
Mammalia	Carnivora	Canidae	Lycalopex	griseus	Argentinian gray fox			56		4.2					3990	10.9				0.314935	0.21353	0.471535
Mammalia	Carnivora	Canidae	Lycalopex	gymnocercus	South American fox	304		57		4		365			8500	13.7				0.345223	0.220023	0.434755
Mammalia	Carnivora	Canidae	Lycalopex	sechurae	Sechura fox										4000	9.9				0.31619	0.191772	0.492038
Mammalia	Carnivora	Canidae	Lycalopex	vetulus	Hoary fox					3		365			5350	12.6				0.326011	0.228683	0.445305
Mammalia	Carnivora	Canidae	Lycaon	pictus	African wild dog	639	639	72	91	8	1	362	318		26500	17	33.01	8750		0.392284	0.201053	0.406663	0.209563	0.136618	0.254684	0.399136
Mammalia	Carnivora	Canidae	Nyctereutes	procyonoides	Raccoon dog	304	304	61	47	6	1	365	75	825	6500	16.6			311.15	0.331226	0.279051	0.389723	0.148247	0.135878	0.308045	0.407831
Mammalia	Carnivora	Canidae	Otocyon	megalotis	Bat-eared fox	365		68	105	4	2	182	122		4150	17				0.311358	0.311008	0.377634	0.210472	0.210858	0.298223	0.280448
Mammalia	Carnivora	Canidae	Speothos	venaticus	Bush dog	304	365	68	101	4	2	249	160		6000	14.1				0.329677	0.247142	0.423181	0.212161	0.159932	0.344918	0.282989
Mammalia	Carnivora	Canidae	Urocyon	cinereoargenteus	Gray fox	345	365	57	55	4	1	365	95	519.7	4750	16.2				0.317826	0.292175	0.389999	0.182651	0.182157	0.300713	0.334479
Mammalia	Carnivora	Canidae	Vulpes	corsac	Corsac fox	504		53	28	4.7		365	62.5		2700	13				0.29579	0.276258	0.427952	0.173927	0.240194	0.250933	0.334946
Mammalia	Carnivora	Canidae	Vulpes	lagopus	Arctic fox	304	304	52	51	9	1	365	70		5200	16.3	7.665	3600	311.75	0.321704	0.288189	0.390107	0.152464	0.151829	0.30703	0.388677
Mammalia	Carnivora	Canidae	Vulpes	macrotis	Kit fox			54		4		365	40		2500	15.8	4.928	1769	311.15	0.290108	0.324627	0.385266
Mammalia	Carnivora	Canidae	Vulpes	pallida	Pale fox			52		4			75		2800	16				0.294905	0.32073	0.384365
Mammalia	Carnivora	Canidae	Vulpes	rueppellii	Ruppell's sand fox					2					3200	14.3				0.302071	0.287585	0.410344
Mammalia	Carnivora	Canidae	Vulpes	velox	Swift fox	365	365	55	46	4.5	1	365	39.65		2400	15.9	4.948	1769		0.288251	0.328464	0.383285	0.141888	0.215287	0.265118	0.377707
Mammalia	Carnivora	Canidae	Vulpes	vulpes	Red fox	304	304	52	48	5	1	365	100	1397	4131.7	21.3	13.731	4580.3	311.85	0.30848	0.361909	0.329611	0.195809	0.199834	0.300502	0.303854
Mammalia	Carnivora	Canidae	Vulpes	zerda	Fennec	274	274	51	66	2.2	1	365	26.28		1250	16.3	2.693	1159.2	311.95	0.259482	0.372731	0.367787	0.135713	0.231659	0.288303	0.344325
Mammalia	Carnivora	Eupleridae	Cryptoprocta	ferox	Fossa	1496		90	129	3	1		100		9500	23.1				0.343856	0.330749	0.325395	0.171605	0.28456	0.079999	0.463836
Mammalia	Carnivora	Eupleridae	Fossa	fossana	Malagasy civet	728		82	76	1		365	67.5		1540	21.4	5.02262	2260	311.05	0.265346	0.421491	0.313163	0.215223	0.355822	0.169461	0.259494
Mammalia	Carnivora	Eupleridae	Galidia	elegans	Malagasy ring-tailed mongoose	737		72	60	1	1	365	50	183	800	26				0.234441	0.504057	0.261502	0.222913	0.414772	0.144297	0.218018
Mammalia	Carnivora	Felidae	Acinonyx	jubatus	Cheetah	456	456	88	107	3	0.7	537	489	1940	53500	20.5	61.77	38446.1	312.15	0.42072	0.20143	0.37785	0.212885	0.0690855	0.301503	0.416527
Mammalia	Carnivora	Felidae	Caracal	caracal	Caracal	456	456	74	122	3		365	165		16000	20.3				0.368148	0.270816	0.361036	0.178107	0.135539	0.265821	0.420533
Mammalia	Carnivora	Felidae	Catopuma	temminckii	Asiatic golden cat	639		95		1			250		13500	23				0.359245	0.308935	0.33182	0.224358	0.204406	0.225711	0.345525
Mammalia	Carnivora	Felidae	Felis	catus	Domestic cat	289		65	56	4			97.5		3900	30			311.25	0.301882	0.442245	0.255874	0.200442	0.218962	0.282688	0.297907
Mammalia	Carnivora	Felidae	Felis	chaus	Jungle cat	335		60	90	3	2	112	131	2212.5	10000	20				0.347811	0.295347	0.356843	0.177828	0.137997	0.300721	0.383454
Mammalia	Carnivora	Felidae	Felis	manul	Pallas' cat	365		72		4.1			89		3500	15.9				0.304719	0.306089	0.389192	0.191353	0.210765	0.292279	0.305603
Mammalia	Carnivora	Felidae	Felis	margarita	Sand cat	274		67		4.5	2	198	55.5		2750	13.9				0.295794	0.290202	0.414004	0.159381	0.179987	0.324396	0.336236
Mammalia	Carnivora	Felidae	Felis	nigripes	Black-footed cat	445	434	66		2	4	228	72.4		2125	15.6				0.283166	0.331404	0.38543	0.198334	0.264834	0.260042	0.27679
Mammalia	Carnivora	Felidae	Felis	silvestris	Wild cat	304	304	64	87	3.7	2.3	114	100	643	5500	19				0.322327	0.319283	0.35839	0.18131	0.168316	0.308386	0.341988
Mammalia	Carnivora	Felidae	Leopardus	colocolo	Colocolo					2.5					2950	19.6				0.294766	0.36321	0.342025
Mammalia	Carnivora	Felidae	Leopardus	geoffroyi	Geoffroy's cat	479		75	68	2	1.3	240	93.2		4000	23				0.306151	0.381074	0.312774	0.196072	0.248148	0.23154	0.324239
Mammalia	Carnivora	Felidae	Leopardus	pardalis	Ocelot	600	600	77	106	2	1	452	255.5	3400	8800	28.2	17.368	10500	311.15	0.338139	0.380087	0.281774	0.247775	0.248197	0.220851	0.283177
Mammalia	Carnivora	Felidae	Leopardus	tigrinus	Little spotted cat			75	56	1.5					2250	21.9				0.281621	0.404192	0.314188
Mammalia	Carnivora	Felidae	Leopardus	wiedii	Margay	659		81	56	1.5			166.5	785.1	3666.7	24	5.227	3600	311.55	0.301847	0.395792	0.302362	0.250902	0.309042	0.205158	0.234898
Mammalia	Carnivora	Felidae	Leptailurus	serval	Serval	821		70	128	2.5	2.5	176	263		13350	22.4	1.44	1012		0.359072	0.303661	0.337266	0.230671	0.229609	0.195488	0.344232
Mammalia	Carnivora	Felidae	Lynx	canadensis	Canada lynx	498	573	63	152	3.5	1	365	204		10100	26.8				0.344759	0.360481	0.29476	0.220832	0.207537	0.241887	0.329744
Mammalia	Carnivora	Felidae	Lynx	lynx	Lynx	639	1004	66	87	2	1	365	246.5	1860	23000	23.7				0.382144	0.284069	0.333787	0.199379	0.159268	0.223053	0.4183
Mammalia	Carnivora	Felidae	Lynx	rufus	Bobcat	365	730	65	65	3	0.9	365	265	1190	8600	32.3	23.446	9400		0.335519	0.411935	0.252546	0.24969	0.21177	0.279626	0.258914
Mammalia	Carnivora	Felidae	Neofelis	nebulosa	Clouded leopard	730	1095	89	130	2			170	5427.5	19500	19.8				0.37708	0.253483	0.369436	0.17496	0.162954	0.205119	0.456967
Mammalia	Carnivora	Felidae	Panthera	leo	Lion	1095	1095	109	216	3	1	649	1300	8480	175000	27	94.58	98000	311.05	0.469168	0.192995	0.337837	0.250105	0.0999585	0.197045	0.452892
Mammalia	Carnivora	Felidae	Panthera	onca	Jaguar	730	730	99	126	2	0.5	365	820	5033.5	81150	28	62.419	50400	310.15	0.435191	0.246738	0.318071	0.244343	0.114015	0.233776	0.407867
Mammalia	Carnivora	Felidae	Panthera	pardus	Leopard	937	771	97	110	2	1.25	444	550	1940	53750	27.3				0.417512	0.265484	0.317005	0.231797	0.158311	0.188524	0.421368
Mammalia	Carnivora	Felidae	Panthera	tigris	Tiger	1268	1415	105	121	2.5	0.4	750	1190	11003	119700	26.3	133.859	137900	310.65	0.452903	0.20962	0.337477	0.260891	0.14244	0.176199	0.42047
Mammalia	Carnivora	Felidae	Prionailurus	bengalensis	Leopard cat	365		62	45	2.5		163	96	620	5000	17				0.319491	0.299958	0.380551	0.18226	0.186243	0.290115	0.341382
Mammalia	Carnivora	Felidae	Prionailurus	planiceps	Flat-headed cat			56							6750	14				0.334903	0.238558	0.426539
Mammalia	Carnivora	Felidae	Prionailurus	rubiginosus	Rusty-spotted cat			68		2.5					1350	17.9				0.261726	0.389194	0.34908
Mammalia	Carnivora	Felidae	Prionailurus	viverrinus	Fishing cat			72	182	2			170		10650	17.2				0.352356	0.257742	0.389903
Mammalia	Carnivora	Felidae	Profelis	aurata	African golden cat			81		2			248.33		10650	21				0.349978	0.302569	0.347453
Mammalia	Carnivora	Felidae	Puma	concolor	Cougar	912	912	92	90	2.5	0.45	786	400	3500	63000	23.8	49.326	37200	310.75	0.426077	0.225255	0.348668	0.196332	0.1228	0.190943	0.489925
Mammalia	Carnivora	Felidae	Puma	yagouaroundi	Jaguarundi	803		73		2	2	182			7000	18.6	9.69	8400	311.55	0.333106	0.300203	0.366691
Mammalia	Carnivora	Felidae	Uncia	uncia	Snow leopard	730	730	96	77	2	1	365	475	7500	50000	21.2				0.417367	0.212983	0.369651	0.217718	0.120935	0.234803	0.426544
Mammalia	Carnivora	Herpestidae	Atilax	paludinosus	Marsh mongoose		255	76	36	2	2	182	100	550	3300	20.8				0.298952	0.369905	0.331143
Mammalia	Carnivora	Herpestidae	Bdeogale	nigripes	Black-legged mongoose					1					2000	15.8				0.280368	0.33786	0.381772
Mammalia	Carnivora	Herpestidae	Crossarchus	obscurus	Long-nosed cusimanse	274	274	58	23	4	2.5	122	9.8		790	13.3				0.241875	0.354267	0.403858	0.0726312	0.225272	0.269295	0.432802
Mammalia	Carnivora	Herpestidae	Cynictis	penicillata	Yellow mongoose	730		56	61	2	2	365			598.5	15.2				0.228168	0.400718	0.371115
Mammalia	Carnivora	Herpestidae	Galerella	pulverulenta	Cape grey mongoose			61	58	2.6			20.2		650	11.7				0.234888	0.337051	0.428061
Mammalia	Carnivora	Herpestidae	Galerella	sanguinea	Slender mongoose	365	365	65	55	2	2	182			500	12.6	2.202	519.6	311.85	0.222553	0.369253	0.408194
Mammalia	Carnivora	Herpestidae	Helogale	parvula	Dwarf mongoose	456		55	21	3	2.25	142			274.8	18				0.192179	0.48485	0.322972
Mammalia	Carnivora	Herpestidae	Herpestes	edwardsi	Indian gray mongoose			59		2.6	3.3	110			1000	12.3				0.253095	0.322734	0.424171
Mammalia	Carnivora	Herpestidae	Herpestes	javanicus	Javan mongoose	301	122	49	50	2	2	151	25.92	275	800	16.6	2.248	611	312.95	0.239785	0.403294	0.356921	0.155837	0.280075	0.273993	0.290095
Mammalia	Carnivora	Herpestidae	Herpestes	smithii	Ruddy mongoose					2.5					1702.5	17.8				0.271919	0.374178	0.353904
Mammalia	Carnivora	Herpestidae	Herpestes	urva	Crab-eating mongoose			66		3					1863.2	13.3				0.279327	0.303381	0.417292
Mammalia	Carnivora	Herpestidae	Herpestes	vitticollis	Striped-necked mongoose					2.5					2250	12.8				0.288017	0.283589	0.428395
Mammalia	Carnivora	Herpestidae	Ichneumia	albicauda	White-tailed mongoose				274	2.3					3500	14.8				0.305573	0.289989	0.404438
Mammalia	Carnivora	Herpestidae	Mungos	mungo	Banded mongoose	289		60		2.5	2	365	39		1331.5	17.4				0.261461	0.38365	0.354889	0.166641	0.248871	0.289869	0.29462
Mammalia	Carnivora	Herpestidae	Suricata	suricatta	Meerkat	365	365	77	44	4	1	365	29	225.5	776	20.6	1.729	850	309.45	0.235884	0.453582	0.310534	0.170825	0.317612	0.236808	0.274756
Mammalia	Carnivora	Hyaenidae	Crocuta	crocuta	Spotted hyena	1095	639	110	265	2	1	449	1390	14500	63000	41.1				0.41957	0.347942	0.232487	0.307559	0.215569	0.170306	0.306566
Mammalia	Carnivora	Hyaenidae	Hyaena	brunnea	Brown hyena	1000		92	342	2.5	0.4	511	688	27400	42250	31.9				0.405149	0.314731	0.28012	0.263736	0.202354	0.176525	0.357385
Mammalia	Carnivora	Hyaenidae	Hyaena	hyaena	Striped hyena	800	800	90	279	2.5		237	700		40000	25	31.954	34300	310.15	0.405663	0.263242	0.331095	0.262688	0.172253	0.224115	0.340944
Mammalia	Carnivora	Hyaenidae	Proteles	cristata	Aardwolf			84	132	2.5			275		10000	20	11.563	7902.6	309.55	0.347811	0.295347	0.356843
Mammalia	Carnivora	Mephitidae	Conepatus	chinga	Molina's hog-nosed skunk										3400	10				0.308977	0.203668	0.487356
Mammalia	Carnivora	Mephitidae	Conepatus	leuconotus	Hog-nosed skunk	319	319	56		3.4	1.5	182			1900	10.2				0.283341	0.242626	0.474033
Mammalia	Carnivora	Mephitidae	Mephitis	mephitis	Striped skunk	335	335	63	60	5	1	365	33.5	493.5	3500	13.9			309.6	0.30632	0.2759	0.41778	0.108418	0.160547	0.280264	0.450771
Mammalia	Carnivora	Mephitidae	Spilogale	putorius	Spotted skunk	152	152	31	50	5	1.5	243	9.5	160	600	10.5	1.674	624	309.55	0.232683	0.317497	0.449821	0.0748217	0.178048	0.364115	0.383015
Mammalia	Carnivora	Mustelidae	Aonyx	capensis	African clawless otter	365	365	63	53	2.5			1050	3360	23500	14.2				0.389184	0.167762	0.443054	0.306648	0.1249	0.382895	0.185558
Mammalia	Carnivora	Mustelidae	Aonyx	cinereus	Oriental small-clawed otter			63	81	1.42	2	182	57		3000	23				0.293594	0.398136	0.30827
Mammalia	Carnivora	Mustelidae	Arctonyx	collaris	Hog badger			42	104	3			58		10500	15.8				0.352748	0.239517	0.407735
Mammalia	Carnivora	Mustelidae	Eira	barbara	Tayra	700	183	66	75	2			83	1708	4500	22.3	6.811	2950	311.55	0.31166	0.367148	0.321191	0.183757	0.268353	0.178644	0.369246
Mammalia	Carnivora	Mustelidae	Enhydra	lutris	Sea otter	974	1369	140	175	1	0.8	548	1868	13425	25850	27	98.479	26832.8	310.65	0.385691	0.306416	0.307893	0.365949	0.267928	0.225394	0.140729
Mammalia	Carnivora	Mustelidae	Galictis	cuja	Little grison										1000	10.2				0.255325	0.280692	0.463983
Mammalia	Carnivora	Mustelidae	Galictis	vittata	Grison			40		2					2300	12.5				0.289258	0.276959	0.433782
Mammalia	Carnivora	Mustelidae	Gulo	gulo	Wolverine	710	776	35	87	3	0.5	639	95		16333.3	19.5	31.765	12700	310.15	0.369527	0.260564	0.369909	0.134654	0.154454	0.190357	0.520536
Mammalia	Carnivora	Mustelidae	Hydrictis	maculicollis	Spotted-necked otter			61		2		365			4000	22.9				0.306203	0.380096	0.313701
Mammalia	Carnivora	Mustelidae	Ictonyx	striatus	Striped polecat, zorilla	304	393	36	79	2	1	365	15	170	910	14				0.247437	0.357399	0.395164	0.102765	0.240786	0.266043	0.390406
Mammalia	Carnivora	Mustelidae	Lontra	canadensis	Northern river otter	730	730	62	122	2.5	0.9	365	140	1510	9000	27			311.55	0.339638	0.368989	0.291373	0.198171	0.241419	0.177182	0.383228
Mammalia	Carnivora	Mustelidae	Lutra	lutra	Eurasian river otter	548	548	61	55	2	1	365	110.5		6750	18.2	25.104	10000	311.25	0.331778	0.297477	0.370745	0.184311	0.207888	0.235303	0.372498
Mammalia	Carnivora	Mustelidae	Martes	americana	American marten	365	365	28	46	3	1	365	30	392	884	17.8	3.579	966.5	311.15	0.243312	0.413047	0.343642	0.165779	0.298996	0.248073	0.287152
Mammalia	Carnivora	Mustelidae	Martes	flavigula	Yellow-throated marten			150		2.5		182	57.5		2500	16				0.289958	0.327451	0.382591
Mammalia	Carnivora	Mustelidae	Martes	foina	Beech marten	548	730	30	66	3.5	1	365	30		1700	18.2				0.27159	0.379255	0.349155	0.13956	0.282252	0.19165	0.386538
Mammalia	Carnivora	Mustelidae	Martes	martes	European pine marten	456	426	28	59	4	1	365	30	680	1300	18.2	4	920	310.15	0.259881	0.395165	0.344954	0.150301	0.288015	0.216464	0.34522
Mammalia	Carnivora	Mustelidae	Martes	pennanti	Fisher	365	365	45	66	2.5	1	365	35		3175	14.3			311.65	0.301729	0.288051	0.410221	0.117503	0.180416	0.268231	0.433849
Mammalia	Carnivora	Mustelidae	Martes	zibellina	Sable	456	456	30	56	3			30	600	1066.7	18.4				0.251117	0.40935	0.339533	0.159432	0.305866	0.215742	0.31896
Mammalia	Carnivora	Mustelidae	Meles	meles	Old World badger	365	365	49	90	3	1	365	80		13000	18.6	16.647	11050	310.15	0.360127	0.26349	0.376384	0.125002	0.101889	0.277546	0.495563
Mammalia	Carnivora	Mustelidae	Mellivora	capensis	Honey badger			180		2	2	182	210		10000	31.3				0.342476	0.395928	0.261596
Mammalia	Carnivora	Mustelidae	Melogale	moschata	Ferret badger					2.5					672	19				0.230566	0.443959	0.325475
Mammalia	Carnivora	Mustelidae	Mustela	erminea	Ermine	95	365	43	45	6.77	1	365	2.3	26.6	110.3	12.5	1.276	125.5	312.75	0.156677	0.457099	0.386224	0.0335201	0.240919	0.367881	0.35768
Mammalia	Carnivora	Mustelidae	Mustela	eversmanii	East European polecat	319	319	36	51	9.4	1	365	5.73		1350	9.1				0.269783	0.237268	0.49295	0.000289154	0.152408	0.25699	0.590313
Mammalia	Carnivora	Mustelidae	Mustela	frenata	Long-tailed weasel	162	365	25	37	6.2	1	365	3.1	34.6	150.6	8.8	1.344	225	312.15	0.17445	0.359812	0.465738	0.0435606	0.255019	0.330342	0.371079
Mammalia	Carnivora	Mustelidae	Mustela	lutreola	European mink	323	323	54	57	4		365	8		590	8.4				0.234606	0.268382	0.497011	0.0644428	0.232708	0.272268	0.430582
Mammalia	Carnivora	Mustelidae	Mustela	nigripes	Black-footed ferret	365	365	43		3		365	7.4		1021	9.4				0.257205	0.261117	0.481678	0.03554	0.200451	0.245254	0.518755
Mammalia	Carnivora	Mustelidae	Mustela	nivalis	Common weasel	120	120	36	39	5	1.5	200	2.6	43.5	46.9	9.1				0.12313	0.436527	0.440343	0.0801559	0.32363	0.362746	0.233468
Mammalia	Carnivora	Mustelidae	Mustela	putorius	European polecat	312	322	42	63	7.5	1.5	140	9.5		809	11.1				0.245066	0.312251	0.442683	0.0676406	0.224073	0.263304	0.444983
Mammalia	Carnivora	Mustelidae	Mustela	sibirica	Siberian weasel			29	60	6					565	8.8				0.232163	0.281397	0.48644
Mammalia	Carnivora	Mustelidae	Neovison	vison	American mink	334	371	42	49	4.5	1	365	8.5	110	925	11.4	2.722	660	312.15	0.250597	0.310293	0.43911	0.0532761	0.216578	0.248499	0.481647
Mammalia	Carnivora	Mustelidae	Pteronura	brasiliensis	Giant otter	730		68	122	1.5	1	365	204.25		24000	17.3				0.387751	0.210858	0.401391	0.178874	0.143492	0.220638	0.456997
Mammalia	Carnivora	Mustelidae	Taxidea	taxus	American badger	183	441	41	56	3	0.7	365	93.5	3000	8000	25	15.062	9000	311.15	0.335413	0.358692	0.305895	0.158347	0.100665	0.355374	0.385614
Mammalia	Carnivora	Mustelidae	Vormela	peregusna	Marbled polecat	91		61	30	5.76		365			542.5	8.8				0.230389	0.283807	0.485804
Mammalia	Carnivora	Nandiniidae	Nandinia	binotata	African palm civet	1095	1095	64	64	2	2	182	55		1900	21	5.565	4270	310.55	0.274741	0.404795	0.320464	0.191777	0.368337	0.108833	0.331054
Mammalia	Carnivora	Otariidae	Arctocephalus	australis	South American fur seal	1095	2556	236	411	1	1	365	4250		110000	30.6				0.447411	0.248639	0.30395	0.370431	0.189116	0.228335	0.212118
Mammalia	Carnivora	Otariidae	Arctocephalus	pusillus	South African fur seal	1276	1643	368	354	1	1	365	6200	26150	127551	32.1				0.453303	0.250606	0.296091	0.396649	0.206868	0.21709	0.179394
Mammalia	Carnivora	Otariidae	Arctocephalus	tropicalis	Sub-Antarctic fur seal	1734	3833	357	239	1	1	365	4420		50000	23				0.416396	0.231283	0.352321	0.409368	0.286583	0.1877	0.116349
Mammalia	Carnivora	Otariidae	Eumetopias	jubatus	Northern sea lion	1780	2420	274	279	1	1	365	19000	106610	415000	32.8				0.504541	0.185484	0.309975	0.438205	0.176505	0.208234	0.177055
Mammalia	Carnivora	Otariidae	Neophoca	cinerea	Australian sea lion	1095	2191	258	570	1	0.69	540	7075	59724	190000	24.1				0.474111	0.162601	0.363288	0.384447	0.145563	0.261984	0.208006
Mammalia	Carnivora	Otariidae	Otaria	flavescens	Southern sea lion	1461	2191	357	365	1	1	365	12500		207500	29				0.475752	0.19894	0.325308	0.432035	0.196145	0.229426	0.142394
Mammalia	Carnivora	Otariidae	Phocarctos	hookeri	New Zealand sea lion	1095	2191	365	213	1	1	365	7000		187580	23				0.474108	0.15287	0.373022	0.383539	0.1436	0.264872	0.207989
Mammalia	Carnivora	Otariidae	Zalophus	californianus	California sea lion	1095	1826	259	315	1.2	0.5	730	7000	25000	180000	35.7			311.25	0.467071	0.254049	0.27888	0.391184	0.172651	0.23434	0.201825
Mammalia	Carnivora	Phocidae	Halichoerus	grypus	Gray seal	1460	1887	240	19	1	0.9	365	14000	41450	268000	42.9				0.482257	0.271702	0.246042	0.434879	0.200454	0.206087	0.15858
Mammalia	Carnivora	Phocidae	Phoca	vitulina	Harbor seal	1095	1460	253	30	1	1	365	11000	23945	115000	47.6	73.29	27400	309.85	0.444089	0.345224	0.210686	0.452554	0.244143	0.229665	0.0736386
Mammalia	Carnivora	Phocidae	Pusa	caspica	Caspian seal	2009	2191	330	30	1		365	5000		86000	50				0.43082	0.373504	0.195676	0.406235	0.30275	0.117976	0.17304
Mammalia	Carnivora	Phocidae	Pusa	hispida	Ringed seal	1826	2191	251	53	1	1	365	6000	14000	90000	46				0.433797	0.352083	0.21412	0.417341	0.291209	0.142769	0.148681
Mammalia	Carnivora	Phocidae	Pusa	sibirica	Baikal seal	2129	2557	273	68	1.02	1	365	3000	66900	90000	56				0.431455	0.396258	0.172287	0.364031	0.293014	0.0850733	0.257881
Mammalia	Carnivora	Procyonidae	Bassaricyon	alleni	Southern bushy-tailed olingo										1235	25.2				0.253766	0.471287	0.274947
Mammalia	Carnivora	Procyonidae	Bassaricyon	gabbii	Olingo	685	594	73		1			55		1235	21.8				0.255492	0.438739	0.305769	0.208144	0.363108	0.169522	0.259227
Mammalia	Carnivora	Procyonidae	Bassariscus	astutus	Ringtail	300	300	52	42	3	1	365	30	258.7	1015	19			310.75	0.248566	0.419502	0.331932	0.158809	0.271977	0.269939	0.299274
Mammalia	Carnivora	Procyonidae	Bassariscus	sumichrasti	Cacomistle	300	300	64		2			25		900	24	3.537	1280	311.95	0.240535	0.479096	0.280368	0.15232	0.289587	0.247594	0.310499
Mammalia	Carnivora	Procyonidae	Nasua	narica	White-nosed coati	712	712	78	127	4.17		365	140		3750	26.4	6.733	3670	311.75	0.301692	0.415863	0.282445	0.237461	0.313937	0.182272	0.26633
Mammalia	Carnivora	Procyonidae	Nasua	nasua	Coatimundi	730	730	73	86	4		365	140	730	4750	23.7	5.591	3924.3	309.55	0.313295	0.377615	0.309089	0.2255	0.289501	0.186358	0.298641
Mammalia	Carnivora	Procyonidae	Potos	flavus	Kinkajou	820	550	115	119	1	1	365	175		3000	38.4	4.294	2318	309.25	0.28749	0.513241	0.199269	0.272015	0.376392	0.144774	0.206819
Mammalia	Carnivora	Procyonidae	Procyon	cancrivorus	Crab-eating raccoon	365	365	63		3			71		6270	19	2.588	1160	310.15	0.328046	0.311512	0.360442	0.148583	0.162415	0.272186	0.416816
Mammalia	Carnivora	Procyonidae	Procyon	lotor	Common raccoon	365	365	63	91	4	1	365	80	1175	6000	21	10.428	4842.2	311.15	0.324933	0.336599	0.338469	0.161729	0.176223	0.269262	0.392786
Mammalia	Carnivora	Ursidae	Ailuropoda	melanoleuca	Giant panda	2192	2192	48	182	1.5	0.7	548	110	22000	117500	36.8				0.448093	0.286159	0.265748	0.0742904	0.132486	-0.00108625	0.79431
Mammalia	Carnivora	Ursidae	Helarctos	malayanus	Sun bear	2372	1095	95	90	1			325		46000	35.9			311.25	0.407454	0.336216	0.25633	0.20645	0.258185	0.0266651	0.5087
Mammalia	Carnivora	Ursidae	Melursus	ursinus	Sloth bear	1095	1095	198	76	1.5		1095	400		100000	33.3	47.064	66957		0.442244	0.27328	0.284476	0.181187	0.119532	0.142885	0.556396
Mammalia	Carnivora	Ursidae	Tremarctos	ornatus	Spectacled bear	2008	2008	228	90	2	1		320		109250	39				0.444224	0.303516	0.25226	0.16564	0.171198	0.042673	0.620489
Mammalia	Carnivora	Ursidae	Ursus	americanus	American black bear	1278	1278	70	198	2	0.4	730	277.5	14050	154250	34				0.460914	0.252248	0.286838	0.132862	0.0849922	0.10822	0.673925
Mammalia	Carnivora	Ursidae	Ursus	arctos	Brown bear and grizzly bear	1313	1313	103	213	2	0.4	852	510	26000	277500	40			310.45	0.484611	0.253918	0.261472	0.15866	0.0671876	0.113677	0.660475
Mammalia	Carnivora	Ursidae	Ursus	maritimus	Polar bear	1734	1734	65	303	2	0.4	750	665	27000	475000	43.8			309.95	0.506991	0.242422	0.250588	0.159482	0.061567	0.0787361	0.700215
Mammalia	Carnivora	Ursidae	Ursus	thibetanus	Asiatic black bear	1095	1095	228	99	2		365	463		103750	39.2			310.65	0.441908	0.307728	0.250364	0.193705	0.130897	0.136473	0.538925
Mammalia	Carnivora	Viverridae	Arctictis	binturong	Binturong	925	840	92	79	2	2	348	318	2100	12250	27	12.747	14280	309.85	0.353095	0.350705	0.2962	0.253615	0.265976	0.172856	0.307553
Mammalia	Carnivora	Viverridae	Arctogalidia	trivirgata	Small-toothed palm civet	1095		45	61	2.5	2	182			2250	16.1	3.085	2010	309.35	0.285285	0.335099	0.379616
Mammalia	Carnivora	Viverridae	Civettictis	civetta	African civet	365	213	65	120	2.5	2.2	221	380.5	1514	13666.7	28				0.357438	0.352382	0.29018	0.256569	0.175847	0.301646	0.265938
Mammalia	Carnivora	Viverridae	Genetta	genetta	Small-spotted genet	1479		78	62	2	2	182	77.75		1866.7	22.7				0.273042	0.423325	0.303634	0.22449	0.415279	0.0745834	0.285648
Mammalia	Carnivora	Viverridae	Genetta	maculata	Panther genet					2.3					2225	20				0.282214	0.384474	0.333312
Mammalia	Carnivora	Viverridae	Genetta	tigrina	Large-spotted genet	1461		70	59	2.5	2	304	71.5		1820	21.3	4.189	1699	310.15	0.272694	0.410532	0.316774	0.217805	0.40969	0.0778375	0.294667
Mammalia	Carnivora	Viverridae	Hemigalus	derbyanus	Banded palm civet				71	2			125		2400	16				0.288176	0.329872	0.381951
Mammalia	Carnivora	Viverridae	Paguma	larvata	Masked palm civet					2.3	2	182			4300	27.4				0.307223	0.416096	0.276681
Mammalia	Carnivora	Viverridae	Paradoxurus	hermaphroditus	Common palm civet	341		60		3.4	2	182	88.65		3100	24.5	5.534	3282.6	309.65	0.294273	0.410379	0.295348	0.201681	0.23972	0.271301	0.287298
Mammalia	Carnivora	Viverridae	Viverra	civettina	Malabar civet										12061	15.4				0.359103	0.225539	0.415358
Mammalia	Carnivora	Viverridae	Viverra	tangalunga	Tangalunga					2					7350	15				0.337798	0.249002	0.4132
Mammalia	Carnivora	Viverridae	Viverra	zibetha	Oriental civet			80	30	3	2	182			10000	21.7				0.346839	0.313667	0.339494
Mammalia	Cetacea	Balaenidae	Balaena	mysticetus	Bowhead whale	8212	8212	396	365	1	0.3	1642	900000		100000000	211				0.721771	0.278229	2.22045e-16	0.543292	0.088331	0.00181959	0.366558
Mammalia	Cetacea	Balaenidae	Eubalaena	australis	Southern right whale	3285	3650	365	240	1	0.3	1214	910000		45000000	70				0.700057	0.0778049	0.222138	0.55878	0.00664538	0.202438	0.232137
Mammalia	Cetacea	Balaenidae	Eubalaena	glacialis	Northern right whale	2920	2920	350	213	1	0.29	1445	794328		23000000	67				0.671283	0.107773	0.220944	0.576575	0.0464991	0.216899	0.160027
Mammalia	Cetacea	Balaenopteridae	Balaenoptera	acutorostrata	Minke whale	2740	2740	312	183	1	1	470	320000		7500000	50				0.625856	0.108506	0.265638	0.548253	0.0891615	0.215392	0.147193
Mammalia	Cetacea	Balaenopteridae	Balaenoptera	borealis	Sei whale	3652	3652	345	266	1	0.5	730	680000		20000000	74				0.663999	0.138377	0.197623	0.573192	0.0803844	0.174649	0.171775
Mammalia	Cetacea	Balaenopteridae	Balaenoptera	edeni	Bryde's whale	3104	3104	376	274	1	0.5		1000000		16000000	72				0.654586	0.145458	0.199956	0.613461	0.0961711	0.21149	0.0788778
Mammalia	Cetacea	Balaenopteridae	Balaenoptera	musculus	Blue whale	1827	1827	350	182	1	0.4	914	2000000	17000000	136000000	110				0.74295	0.113715	0.143336	0.574701	-0.0920212	0.276406	0.240915
Mammalia	Cetacea	Balaenopteridae	Balaenoptera	physalus	Fin whale	2701	2864	342	183	1	0.4	608	1800000		70000000	114				0.713534	0.161124	0.125341	0.599753	0.00158591	0.217825	0.180836
Mammalia	Cetacea	Balaenopteridae	Megaptera	novaeangliae	Humpback whale	1643	1643	342	236	1	0.5	657	1350000		30000000	95			309.15	0.678722	0.170431	0.150847	0.608242	0.00713334	0.28794	0.0966846
Mammalia	Cetacea	Delphinidae	Cephalorhynchus	commersonii	Commerson's dolphin	2008	2008	350	270	1	1	365	6600		50000	25.8				0.415028	0.257082	0.32789	0.445062	0.321319	0.173456	0.0601627
Mammalia	Cetacea	Delphinidae	Cephalorhynchus	hectori	Hector's dolphin	2829	2829	330	540	1	0.42				56000	20				0.423007	0.193176	0.383817
Mammalia	Cetacea	Delphinidae	Globicephala	macrorhynchus	Short-finned pilot whale	3470	5332	452	730	1	0.2	1095	60000		2200000	63				0.569571	0.233142	0.197287	0.470975	0.173276	0.111365	0.244385
Mammalia	Cetacea	Delphinidae	Globicephala	melas	Long-finned pilot whale	2470	4380	450	812	1	0.2		109667		1060000	60				0.53828	0.26549	0.19623	0.550519	0.222604	0.181008	0.0458687
Mammalia	Cetacea	Delphinidae	Grampus	griseus	Risso's dolphin	3285		365	450	1	0.4		20000		425000	42.5				0.502495	0.242252	0.255253	0.449581	0.249875	0.109399	0.191145
Mammalia	Cetacea	Delphinidae	Lagenorhynchus	acutus	Atlantic white-sided dolphin	2231	4380	316	548	1	0.4	913	24000		208000	27				0.476709	0.18275	0.340542	0.488065	0.255161	0.199321	0.0574533
Mammalia	Cetacea	Delphinidae	Lagenorhynchus	obliquidens	Pacific white-sided dolphin	3832	3285	320		1			14000		103000	46				0.439686	0.344082	0.216232	0.486857	0.380084	0.0714037	0.0616552
Mammalia	Cetacea	Delphinidae	Orcaella	brevirostris	Irrawaddy dolphin	1826	1826	426	471	1			12300	45000	190000	30				0.471503	0.211778	0.316719	0.436913	0.226556	0.196496	0.140034
Mammalia	Cetacea	Delphinidae	Orcinus	orca	Killer whale	3780	4930	435	471	1	0.2	1096	180000		3990000	90			309.15	0.591309	0.277933	0.130758	0.539813	0.188833	0.111949	0.159406
Mammalia	Cetacea	Delphinidae	Peponocephala	electra	Melon-headed whale	4290	2465	365		1			12000		206000	47				0.469685	0.307803	0.222511	0.443833	0.326397	0.0493748	0.180395
Mammalia	Cetacea	Delphinidae	Pseudorca	crassidens	False killer whale	3468	6756	451	730	1	0.1	1096			748000	62.5			309.75	0.522577	0.295333	0.18209
Mammalia	Cetacea	Delphinidae	Sotalia	fluviatilis	River dolphin	2190	2190	325		1					46666.7	35				0.408384	0.329661	0.261955
Mammalia	Cetacea	Delphinidae	Sousa	chinensis	Indo-Pacific humpbacked dolphin	3468	4563	330	150	1	1				280000	40				0.485002	0.253386	0.261612
Mammalia	Cetacea	Delphinidae	Stenella	attenuata	Pantropical spotted dolphin	2983	3956	345	543	1	0.3	1123	10000		112500	46				0.443537	0.338849	0.217613	0.453154	0.336649	0.0938011	0.116396
Mammalia	Cetacea	Delphinidae	Stenella	coeruleoalba	Striped dolphin	2834	3025	350	480	1.5	0.3	1253	10000		112500	57.5				0.44088	0.38896	0.17016	0.455679	0.344667	0.0852049	0.114449
Mammalia	Cetacea	Delphinidae	Steno	bredanensis	Rough-toothed dolphin	3650	5110								114000	32				0.448437	0.256567	0.294996
Mammalia	Cetacea	Delphinidae	Tursiops	truncatus	Bottlenosed dolphin	2831	3689	365	548	1	0.5	858	19350		200000	51.6				0.467283	0.330525	0.202192	0.482485	0.311333	0.114992	0.0911894
Mammalia	Cetacea	Eschrichtiidae	Eschrichtius	robustus	Gray whale	2922	2922	395	180	1	0.5	730	500000		28500000	77				0.678985	0.126297	0.194718	0.53053	0.0197428	0.191513	0.258215
Mammalia	Cetacea	Hyperoodontidae	Berardius	bairdii	Baird's beaked whale	4383	2922	517		1	0.3				11380000	84				0.637877	0.200283	0.16184
Mammalia	Cetacea	Hyperoodontidae	Hyperoodon	ampullatus	Northern bottlenose whale	3652	3287	365	365	1	1	365			6500000	37				0.623196	0.049374	0.32743
Mammalia	Cetacea	Hyperoodontidae	Mesoplodon	densirostris	Blainville's beaked whale	3287	3285			1			60000		1088000	27				0.548928	0.0846241	0.366448	0.491422	0.180316	0.177654	0.150608
Mammalia	Cetacea	Hyperoodontidae	Mesoplodon	europaeus	Gervais's beaked whale										5600000	48				0.613591	0.116664	0.269745
Mammalia	Cetacea	Hyperoodontidae	Ziphius	cavirostris	Cuvier's beaked whale			365		1			270000		2701000	62				0.578717	0.217382	0.203902
Mammalia	Cetacea	Iniidae	Inia	geoffrensis	Amazon dolphin	1825	1825	287	360	1	1		6800		84000	31.3				0.435371	0.269711	0.294918	0.42573	0.27925	0.173816	0.121204
Mammalia	Cetacea	Iniidae	Lipotes	vexillifer	Yangzte river dolphin or baiji	2920	1460	319		1	0.5	730			83500	24				0.438273	0.210427	0.351299
Mammalia	Cetacea	Kogiidae	Kogia	breviceps	Pygmy sperm whale			335	365	1	1		82000		424600	17				0.513366	0.0365373	0.450096
Mammalia	Cetacea	Monodontidae	Delphinapterus	leucas	Beluga	1644	2283	416	679	1	0.3	1004	66000		1430000	40			308.95	0.556178	0.156679	0.287143	0.486549	0.116315	0.246864	0.150272
Mammalia	Cetacea	Monodontidae	Monodon	monoceros	Narwhal	2191	2922	450	608	1	0.3	914	80000		1250000	50				0.547648	0.214768	0.237583	0.513704	0.175175	0.199167	0.111954
Mammalia	Cetacea	Phocoenidae	Neophocaena	phocaenoides	Finless porpoise	2190	1460	320	320	1	0.5	730	7000	24500	32500	33				0.393293	0.337904	0.268803	0.473399	0.383436	0.146732	-0.00356752
Mammalia	Cetacea	Phocoenidae	Phocoena	phocoena	Harbor porpoise	1055	1461	320	243	1	1	365	7000		52500	20.4	107.675	28500		0.419954	0.201451	0.378595	0.439535	0.243939	0.27846	0.0380662
Mammalia	Cetacea	Phocoenidae	Phocoenoides	dalli	Dall's porpoise	1826	2375	347	302	1	0.7	1096			120000	22				0.455139	0.16938	0.375481
Mammalia	Cetacea	Physeteridae	Physeter	macrocephalus	Sperm whale	2922	3650	502	560	1	0.2	1259	1000000		28500000	77				0.678985	0.126297	0.194718	0.587632	0.0440218	0.214858	0.153487
Mammalia	Cetacea	Platanistidae	Platanista	gangetica	Ganges dolphin	3652	3652	345	365	1					70000	28				0.42874	0.255503	0.315757
Mammalia	Chiroptera	Emballonuridae	Saccopteryx	bilineata	Greater sac-winged bat	365			60	1	1		3.49	6.8	7.9	6	0.081	7.8	308.65	0.050345	0.448624	0.501031	0.18865	0.57133	0.252045	-0.0120243
Mammalia	Chiroptera	Megadermatidae	Macroderma	gigas	Australian false vampire bat					1	1		21.6		150	22.6	0.639	126	310.15	0.163043	0.571861	0.265096
Mammalia	Chiroptera	Megadermatidae	Megaderma	lyra	Greater false vampire bat	540	450	150		1	1		7.5		38.6	14				0.109498	0.544818	0.345684	0.193795	0.546584	0.165881	0.0937408
Mammalia	Chiroptera	Molossidae	Tadarida	brasiliensis	Brazilian free-tailed bat	273	547	78		1	1	365	2.8		12.5	12	0.117	13.3	309.15	0.0621189	0.57707	0.360811	0.156459	0.536016	0.235523	0.0720024
Mammalia	Chiroptera	Molossidae	Tadarida	teniotis	European free-tailed bat					1					35	13			308.25	0.106107	0.533982	0.359911
Mammalia	Chiroptera	Mystacinidae	Mystacina	tuberculata	New Zealand lesser short-tailed bat					1	1		3.2		23.5	7.6				0.0951129	0.437058	0.467829
Mammalia	Chiroptera	Noctilionidae	Noctilio	leporinus	Greater bulldog bat					1	1				50	11.8	0.4	61	306.95	0.122829	0.49108	0.386091
Mammalia	Chiroptera	Phyllostomidae	Anoura	geoffroyi	Geoffroy's tailless bat			120		1	1		5.1		15.2	10				0.0728265	0.524528	0.402646
Mammalia	Chiroptera	Phyllostomidae	Artibeus	jamaicensis	Jamaican fruit-eating bat	289	289	76		1	2		5.9		42.2	19.2	0.359	46.1	309.55	0.109629	0.61046	0.279911	0.169192	0.48888	0.220074	0.121855
Mammalia	Chiroptera	Phyllostomidae	Carollia	perspicillata	Seba's short-tailed bat	258	258	95		1	2	159	5	12.5	15	17	0.24	14.9	309.55	0.0659289	0.644476	0.289595	0.200067	0.555216	0.238437	0.00627991
Mammalia	Chiroptera	Phyllostomidae	Desmodus	rotundus	Vampire bat	285	285	189	274	1	2	289	8		33.2	29.2	0.194	29.4	308.15	0.0941654	0.718839	0.186996	0.210569	0.543371	0.203129	0.0429303
Mammalia	Chiroptera	Phyllostomidae	Diphylla	ecaudata	Hairy-legged vampire bat					1			4.8		28	8				0.10215	0.438186	0.459665
Mammalia	Chiroptera	Phyllostomidae	Glossophaga	soricina	Pallas's long-tongued bat			106	61	1	2				10	11	0.164	9.6	308.65	0.0534152	0.570763	0.375821
Mammalia	Chiroptera	Phyllostomidae	Leptonycteris	curasoae	Southern long-nosed bat			122		1	1				25	10.1				0.0944268	0.497253	0.408321
Mammalia	Chiroptera	Phyllostomidae	Macrotus	californicus	California leaf-nosed bat	120		270		1			2.52		11.6	17	0.082	11.7	308.15	0.0547092	0.65972	0.285571	0.149266	0.480334	0.318547	0.0518533
Mammalia	Chiroptera	Phyllostomidae	Macrotus	waterhousii	Waterhouse's leaf-nosed bat					1			0.59		16	10.4				0.0745983	0.530293	0.395108
Mammalia	Chiroptera	Phyllostomidae	Phyllostomus	discolor	Pale spear-nosed bat			105		1			7		43.4	9	0.267	33.5	307.75	0.119876	0.438645	0.441479
Mammalia	Chiroptera	Phyllostomidae	Phyllostomus	hastatus	Greater spear-nosed bat			120		1	1		15.9		81	18	0.559	84.2	307.85	0.138857	0.557298	0.303845
Mammalia	Chiroptera	Phyllostomidae	Platyrrhinus	lineatus	White-lined broad-nosed bat			106		1	2		8.3		22	13	0.25	21.9	309.55	0.0858409	0.561518	0.352641
Mammalia	Chiroptera	Phyllostomidae	Sturnira	lilium	Little yellow-shouldered bat			105		1	2		5.2		20	12	0.237	21.4	309.55	0.082634	0.549196	0.36817
Mammalia	Chiroptera	Pteropodidae	Cynopterus	brachyotis	Lesser short-nosed fruit bat	213	213	112		1	2		6.2		45	10.1	0.262	37.2	309.65	0.120083	0.462393	0.417524	0.159521	0.418623	0.307467	0.114389
Mammalia	Chiroptera	Pteropodidae	Cynopterus	sphinx	Greater short-nosed fruit bat	150	525	120	42	1.2	2		11	25	75	10				0.142498	0.429864	0.427638	0.180646	0.360103	0.37462	0.0846308
Mammalia	Chiroptera	Pteropodidae	Dobsonia	moluccensis	Moluccan naked-backed fruit bat			150	180	1	1		55		430	12.3	1.411	312.4	309.95	0.216257	0.372786	0.410957
Mammalia	Chiroptera	Pteropodidae	Eidolon	helvum	Straw-colored fruit bat			275	65	1	1	365	50	135	306.25	21.8			307.65	0.194627	0.521437	0.283936
Mammalia	Chiroptera	Pteropodidae	Epomophorus	gambianus	Gambian epauletted fruit bat			150		1	1.5		10		80	7.8				0.148275	0.370239	0.481486
Mammalia	Chiroptera	Pteropodidae	Epomophorus	wahlbergi	Wahlberg's epauletted fruit bat			165		1	2				80	10.1				0.145197	0.428271	0.426532
Mammalia	Chiroptera	Pteropodidae	Haplonycteris	fischeri	Philippine pygmy fruit bat	120	315	90	70	1	1		2.74		18	10				0.0802065	0.5145	0.405293	0.129231	0.414291	0.358142	0.0983364
Mammalia	Chiroptera	Pteropodidae	Pteropus	alecto	Black flying fox					1.2	1				672.1	19.7				0.230142	0.452075	0.317783
Mammalia	Chiroptera	Pteropodidae	Pteropus	dasymallus	Ryukyu flying fox					1					435	24				0.2088	0.522215	0.268985
Mammalia	Chiroptera	Pteropodidae	Pteropus	giganteus	Indian flying fox	365	365	145	120	1	1	365	45		1175	40	1.622	562.2	309.85	0.24609	0.577999	0.175911	0.196878	0.335316	0.205432	0.262373
Mammalia	Chiroptera	Pteropodidae	Pteropus	hypomelanus	Variable flying fox					1	1				450	20.3	1.618	520.8	308.85	0.212274	0.482604	0.305122
Mammalia	Chiroptera	Pteropodidae	Pteropus	livingstonii	Comoro black flying fox			152		1			137		696.5	15				0.234944	0.38875	0.376306
Mammalia	Chiroptera	Pteropodidae	Pteropus	lylei	Lyle's flying fox										316.7	20.4				0.196882	0.504541	0.298576
Mammalia	Chiroptera	Pteropodidae	Pteropus	niger	Mauritius flying fox					1					456.3	19.4				0.213421	0.471596	0.314983
Mammalia	Chiroptera	Pteropodidae	Pteropus	poliocephalus	Gray-headed flying fox	540	540	190		1	1		80		675	23.6	1.768	598	309.65	0.228178	0.492383	0.279438	0.265629	0.410651	0.208793	0.114927
Mammalia	Chiroptera	Pteropodidae	Pteropus	pumilus	Little golden-mantled flying fox						2				200	17.2	0.705	194.2	309.25	0.178852	0.493483	0.327665
Mammalia	Chiroptera	Pteropodidae	Pteropus	rodricensis	Rodriguez flying fox			198		1	1		45		350	28	0.753	254.5	309.65	0.197475	0.569726	0.232799
Mammalia	Chiroptera	Pteropodidae	Pteropus	scapulatus	Little red flying fox	540	540			1	1				300	15.8	1.353	362	310.15	0.197561	0.450371	0.352068
Mammalia	Chiroptera	Pteropodidae	Pteropus	vampyrus	Large flying fox					1	1				872	20.9	4.486	1024.3	310.05	0.240803	0.449912	0.309285
Mammalia	Chiroptera	Pteropodidae	Rousettus	egyptiacus	Egyptian rousette	365	365	116	122	1	2		21.06	73.8	125	22.9	0.684	146	307.95	0.154928	0.585635	0.259437	0.228826	0.471473	0.219025	0.0806757
Mammalia	Chiroptera	Pteropodidae	Rousettus	lanosus	Long-haired rousette						2				103	18.7				0.148891	0.551615	0.299494
Mammalia	Chiroptera	Pteropodidae	Rousettus	leschenaulti	Leschenault's rousette	150	455	115		1	2		12		108.25	14				0.154508	0.483662	0.36183	0.175556	0.350693	0.354109	0.119642
Mammalia	Chiroptera	Rhinolophidae	Hipposideros	fulvus	Fulvus roundleaf bat	563	563	158		1	1		2.34		7	13				0.0358573	0.629431	0.334711	0.17478	0.654108	0.126502	0.0446105
Mammalia	Chiroptera	Rhinolophidae	Rhinolophus	euryale	Mediterranean horseshoe bat	821	821	90		1	1		3.89		8.2	13				0.0427636	0.620048	0.337189	0.212436	0.694241	0.0927607	0.000562724
Mammalia	Chiroptera	Rhinolophidae	Rhinolophus	ferrumequinum	Greater horseshoe bat	730	730	80	60	1	1	365	5.8		22.875	30.5				0.0773872	0.750712	0.171901	0.208992	0.657069	0.0626129	0.0713259
Mammalia	Chiroptera	Rhinolophidae	Rhinolophus	hipposideros	Lesser horseshoe bat	500	471	67	35	1	1	365	2.1		4.6	29.4				0.00781249	0.83759	0.154598	0.194719	0.722765	0.0822414	0.0002745
Mammalia	Chiroptera	Vespertilionidae	Antrozous	pallidus	Pallid bat	365	365	62	50	2			3.1		20.8	14.8	0.104	22	307.15	0.0818483	0.593966	0.324186	0.146748	0.535193	0.185155	0.132905
Mammalia	Chiroptera	Vespertilionidae	Barbastella	barbastellus	Western barbastelle					2	1	365			10.25	23				0.0457086	0.734941	0.219351
Mammalia	Chiroptera	Vespertilionidae	Eptesicus	fuscus	Big brown bat	547	730	35		2	1	365	3.9	17.2	23	19	0.113	13.3	309.15	0.0832617	0.644103	0.272635	0.167561	0.587666	0.121006	0.123768
Mammalia	Chiroptera	Vespertilionidae	Eptesicus	nilssoni	Northern bat					1.5	1	365			13	20				0.0577472	0.689459	0.252794
Mammalia	Chiroptera	Vespertilionidae	Eptesicus	serotinus	Serotine			68		1.5	1		5.3		18.2	21				0.0718527	0.680461	0.247686
Mammalia	Chiroptera	Vespertilionidae	Lasionycteris	noctivagans	Silver-haired bat	152	152	55	36	2	1	365	1.67		10	12				0.052379	0.590303	0.357318	0.119407	0.481295	0.297061	0.102236
Mammalia	Chiroptera	Vespertilionidae	Lasiurus	cinereus	Hoary bat			56	34	2	1	365	5.5	9.5	24	14			307.95	0.0887563	0.573	0.338244
Mammalia	Chiroptera	Vespertilionidae	Miniopterus	schreibersi	Schreibers's long-fingered bat	577	730	100	66	1	1	365	2.8	12.5	13	22	0.145	10.9	310.85	0.0566121	0.710863	0.232525	0.168534	0.639324	0.0925759	0.0995658
Mammalia	Chiroptera	Vespertilionidae	Myotis	bechsteini	Bechstein's bat					1		365			10.5	21				0.0478439	0.713082	0.239074
Mammalia	Chiroptera	Vespertilionidae	Myotis	blythii	Lesser mouse-eared bat					1					23	33				0.0766868	0.768081	0.155232
Mammalia	Chiroptera	Vespertilionidae	Myotis	brandti	Brandt's bat										7	41				0.0221778	0.887376	0.090446
Mammalia	Chiroptera	Vespertilionidae	Myotis	dasycneme	Pond bat					1					15	20.5				0.0636993	0.686517	0.249783
Mammalia	Chiroptera	Vespertilionidae	Myotis	daubentoni	Daubenton's bat	730	730	54		1	1		2.09		8.5	28				0.0351944	0.790218	0.174587	0.168768	0.702541	0.0343632	0.0943274
Mammalia	Chiroptera	Vespertilionidae	Myotis	emarginatus	Geoffroy's bat	456	456			1	1	365			11	22.7				0.0489474	0.727804	0.223249
Mammalia	Chiroptera	Vespertilionidae	Myotis	evotis	Western long-eared myotis					1	1	365	1.22		7.4	22				0.0320173	0.74428	0.223703
Mammalia	Chiroptera	Vespertilionidae	Myotis	grisescens	Gray myotis	456	456			1	1	365	2.9		9.25	16.5				0.0451834	0.666442	0.288375	0.181258	0.630995	0.145516	0.0422308
Mammalia	Chiroptera	Vespertilionidae	Myotis	keenii	Keen's myotis					1	1	365			7.4	19				0.0337633	0.711357	0.254879
Mammalia	Chiroptera	Vespertilionidae	Myotis	leibii	Eastern small-footed myotis					1	1	365			5.6	12				0.0270706	0.62469	0.348239
Mammalia	Chiroptera	Vespertilionidae	Myotis	lucifugus	Little brown bat	210	210	55	25	1	1	365	1.96		10	34	0.051	5.8	305.15	0.0399758	0.824181	0.135843	0.148817	0.578148	0.18656	0.0864748
Mammalia	Chiroptera	Vespertilionidae	Myotis	myotis	Mouse-eared bat	502	502	65	42	1	1	365	5.9		28.55	37.1			308.15	0.0847274	0.78156	0.133713	0.199948	0.613886	0.0999922	0.0861738
Mammalia	Chiroptera	Vespertilionidae	Myotis	mystacinus	Whiskered bat	365	456			1		365			5.3	24				0.0164123	0.783615	0.199973
Mammalia	Chiroptera	Vespertilionidae	Myotis	nattereri	Natterer's bat				60	1	1	365			7.5	23.7				0.0317168	0.760199	0.208084
Mammalia	Chiroptera	Vespertilionidae	Myotis	nigricans	Black myotis	98	98	55	38	1	2		1	3.7	4.2	7	0.027	3.7	307.15	0.0209328	0.52071	0.458357	0.106045	0.465629	0.376532	0.0517945
Mammalia	Chiroptera	Vespertilionidae	Myotis	sodalis	Indiana bat					1	1		4.53		7.7	20				0.0348871	0.720519	0.244594
Mammalia	Chiroptera	Vespertilionidae	Myotis	thysanodes	Fringed myotis			55	21	1	1	365	1.32		6	18.3			306.15	0.0250563	0.715365	0.259578
Mammalia	Chiroptera	Vespertilionidae	Myotis	velifer	Cave myotis	365	365	65	43	1	1	365	3.2		10.1	11.3	0.04	11.9		0.0535291	0.576216	0.370255	0.178649	0.583565	0.205103	0.0326827
Mammalia	Chiroptera	Vespertilionidae	Myotis	vivesi	Fish-eating bat					1			2.82		25	10	0.199	25	309.15	0.0945453	0.495018	0.410437
Mammalia	Chiroptera	Vespertilionidae	Myotis	volans	Long-legged myotis	152				1	1	365	2.01		7	21				0.0301458	0.737129	0.232726	0.158227	0.551242	0.264497	0.0260344
Mammalia	Chiroptera	Vespertilionidae	Myotis	yumanensis	Yuma myotis					1	1	365	0.79		6.25	14	0.047	5		0.030028	0.652795	0.317177
Mammalia	Chiroptera	Vespertilionidae	Nyctalus	leisleri	Lesser noctule					1.5	1	365			16	16				0.0694679	0.627034	0.303498
Mammalia	Chiroptera	Vespertilionidae	Nyctalus	noctula	Noctule	90	455	60		1.5	1		5.37		27.75	12				0.0969292	0.529773	0.373298	0.165118	0.383205	0.406821	0.0448562
Mammalia	Chiroptera	Vespertilionidae	Nycticeius	balstoni	Western broad-nosed bat			210	29	1.5			2.4	5.6	11.7	9.7				0.0617661	0.533208	0.405026
Mammalia	Chiroptera	Vespertilionidae	Nycticeius	humeralis	Evening bat				30	2	1	365	1.75	2.6	9.75	6			307.15	0.0595289	0.436146	0.504325
Mammalia	Chiroptera	Vespertilionidae	Pipistrellus	kuhlii	Kuhl's pipistrelle				60	1.5		365			6	8				0.0349109	0.529544	0.435545
Mammalia	Chiroptera	Vespertilionidae	Pipistrellus	nathusii	Nathusius's pipistrelle	91	91			2	1				10	11				0.0534152	0.570763	0.375821
Mammalia	Chiroptera	Vespertilionidae	Pipistrellus	pipistrellus	Common pipistrelle	456	456	42	42	1.2	1	365	1.125		5	16.6				0.0182594	0.704283	0.277458	0.131282	0.651728	0.11332	0.10367
Mammalia	Chiroptera	Vespertilionidae	Pipistrellus	subflavus	Eastern pipistrelle	212		44		2	1	365	0.94	5.2	7.5	14.8				0.0373243	0.654461	0.308214	0.0905115	0.530193	0.218363	0.160932
Mammalia	Chiroptera	Vespertilionidae	Plecotus	auritus	Brown big-eared bat	365	365	65	42	1.33	1	365	2.09		7.8	30	0.082	10.2	307.15	0.0306214	0.810809	0.15857	0.168114	0.647681	0.122981	0.0612235
Mammalia	Chiroptera	Vespertilionidae	Plecotus	austriacus	Gray big-eared bat										12	25.5				0.0513601	0.748764	0.199876
Mammalia	Chiroptera	Vespertilionidae	Plecotus	townsendii	Townsend's big-eared bat			78	42	1	1	365	2.4		14.25	20.5				0.0614604	0.689559	0.24898
Mammalia	Chiroptera	Vespertilionidae	Vespertilio	murinus	Particolored bat	730	730	50		2	1	365			18.7	14.5				0.0774467	0.595679	0.326874
Mammalia	Cingulata	Dasypodidae	Chaetophractus	vellerosus	Leeser hairy armadillo										840	16.2	1.707	1110	307.55	0.242205	0.394923	0.362872
Mammalia	Cingulata	Dasypodidae	Chaetophractus	villosus	Hairy armadillo	273	273	67	56	2	1		128		3000	25.2	4.508	4540	308.25	0.292506	0.41865	0.288844	0.232049	0.235787	0.31169	0.220474
Mammalia	Cingulata	Dasypodidae	Dasypus	novemcinctus	Common long-nosed armadillo	365	365	133	137	4	1		66		5500	22.3	4.655	3413.7	307.65	0.320419	0.355247	0.324333	0.150623	0.180537	0.258627	0.410213
Mammalia	Cingulata	Dasypodidae	Dasypus	septemcinctus	Seven-banded armadillo	274		132		6					1475	16.8				0.266346	0.3697	0.363954
Mammalia	Cingulata	Dasypodidae	Euphractus	sexcinctus	Six-banded armadillo	274	274	68	28	2			105	420	4850	22.1	6.901	8190	307.35	0.315037	0.360683	0.32428	0.192209	0.179782	0.313554	0.314455
Mammalia	Cingulata	Dasypodidae	Priodontes	maximus	Giant armadillo	320	320	122	35	1.5			62.15		33000	15	16.892	45190	306.75	0.40335	0.159935	0.436715	0.0580105	-0.0130944	0.301537	0.653547
Mammalia	Cingulata	Dasypodidae	Tolypeutes	matacus	La Plata three-banded armadillo	320	320	120	55	1	1		80		1500	36.8	1.172	1160	306.15	0.257742	0.544792	0.197467	0.231049	0.316792	0.248285	0.203873
Mammalia	Cingulata	Dasypodidae	Zaedyus	pichiy	Pichi	320	320	60	42	2			105		1500	12.5	2.192	1740	308.35	0.270601	0.302309	0.42709	0.239279	0.263787	0.332448	0.164485
Mammalia	Dasyuromorphia	Dasyuridae	Antechinomys	laniger	Kultarr	350	350	12	90	6	1.5	183			24	3.5	0.141	25.8	308.95	0.105266	0.261682	0.633052
Mammalia	Dasyuromorphia	Dasyuridae	Antechinus	agilis	Agile antechinus	330		27	90	10		365		10	18	4.7				0.0891984	0.344946	0.565856
Mammalia	Dasyuromorphia	Dasyuridae	Antechinus	bellus	Fawn antechinus	350		30	96	13	1	365			34	3.4				0.120815	0.234515	0.64467
Mammalia	Dasyuromorphia	Dasyuridae	Antechinus	flavipes	Yellow-footed marsupial mouse	345		25	90	7	1	365			45	3.9	0.252	46.5	308.15	0.131416	0.248703	0.619882
Mammalia	Dasyuromorphia	Dasyuridae	Antechinus	stuartii	Brown antechinus	285	285	30	106	7	1	365	0.016	16	27.5	5.4	0.189	25	308.25	0.106044	0.350989	0.542967
Mammalia	Dasyuromorphia	Dasyuridae	Antechinus	swainsonii	Dusky antechinus	330		28	94	8	1	365		15	41	3.3	0.351	66.9	309.15	0.129342	0.216709	0.65395
Mammalia	Dasyuromorphia	Dasyuridae	Dasycercus	cristicauda	Mulgara	315	315	38	121	7	1	365		22	115	7.4	0.26	91	310.85	0.164742	0.336895	0.498363
Mammalia	Dasyuromorphia	Dasyuridae	Dasyuroides	byrnei	Kowari	238	216	33	102	6	2	167	0.027	45	105	8	0.439	100	308.35	0.159843	0.359798	0.48036
Mammalia	Dasyuromorphia	Dasyuridae	Dasyurus	geoffroii	Western quoll	365		16	158	6	1	365	0.011		890	6.2	2.991	1326.7	309.35	0.256167	0.175804	0.568029
Mammalia	Dasyuromorphia	Dasyuridae	Dasyurus	hallucatus	Northern quoll	315	315		90	6.8	1	365			525	5.9	1.501	571	309.05	0.233719	0.195969	0.570312
Mammalia	Dasyuromorphia	Dasyuridae	Dasyurus	maculatus	Australian tiger cat	340	340	21	135	3	1	365		500	5500	6.8	3.142	1782	310.05	0.334564	0.0885351	0.576901
Mammalia	Dasyuromorphia	Dasyuridae	Dasyurus	viverrinus	Quoll	335	335	20	168	6	1	365	0.02	600	1090	6.8	2.26	945.3	309.05	0.263915	0.184526	0.551559
Mammalia	Dasyuromorphia	Dasyuridae	Parantechinus	apicalis	Speckled marsupial mouse	315	315	48	122	8	1	365			70	5.5				0.146607	0.2997	0.553693
Mammalia	Dasyuromorphia	Dasyuridae	Phascogale	calura	Red-tailed phascogale	330		29	90	7.5	1	365			43	4.7				0.127209	0.2933	0.579491
Mammalia	Dasyuromorphia	Dasyuridae	Phascogale	tapoatafa	Tuan	365	365	29	122	6.4	1	365		70	193.5	5.9	0.694	153.7	310.55	0.190152	0.255164	0.554684
Mammalia	Dasyuromorphia	Dasyuridae	Planigale	maculata	Pygmy planigale	290		20	71	7.65	2	91		4.85	10	5.8	0.067	10.6	307.65	0.0610378	0.427031	0.511931
Mammalia	Dasyuromorphia	Dasyuridae	Planigale	tenuirostris	Narrow-nosed planigale	240		19	95	6	2	332		2.7	5.3	5.2	0.063	7.1	307.65	0.0346266	0.44016	0.525213
Mammalia	Dasyuromorphia	Dasyuridae	Pseudantechinus	macdonnellensis	Fat-tailed marsupial mouse	350	350	43	106	6	1	365	0.0123		32.5	7	0.152	43.1	307.35	0.110245	0.39936	0.490395
Mammalia	Dasyuromorphia	Dasyuridae	Sarcophilus	harrisii	Tasmanian devil	730	730	26	243	3	1	365	0.0235	200	6500	13	8.664	6126.8	308.95	0.334138	0.224154	0.441708
Mammalia	Dasyuromorphia	Dasyuridae	Sminthopsis	crassicaudata	Fat-tailed dunnart	115	159	14	69	7	2	94	0.01	6.5	15	5	0.121	16	308.35	0.0805034	0.369654	0.549843
Mammalia	Dasyuromorphia	Dasyuridae	Sminthopsis	griseoventer	Gray-bellied dunnart										17.5	3.6				0.0911442	0.28674	0.622116
Mammalia	Dasyuromorphia	Dasyuridae	Sminthopsis	macroura	Stripe-faced dunnart	119	159	12	70	4	2	183	0.01	7	20	4.9	0.128	20.6	306.45	0.093301	0.348056	0.558643
Mammalia	Dasyuromorphia	Dasyuridae	Sminthopsis	virginiae	Red-cheeked dunnart	230		15	80	2.5		91		19	34	5.3				0.115528	0.334208	0.550264
Mammalia	Dasyuromorphia	Dasyuridae	Sminthopsis	youngsoni	Lesser hairy-footed dunnart					5.5		365			10	5.3				0.0621114	0.406786	0.531103
Mammalia	Dasyuromorphia	Myrmecobiidae	Myrmecobius	fasciatus	Numbat			14	243	4		365			471.5	11	0.907	438.2	305.65	0.221609	0.342237	0.436154
Mammalia	Didelphimorphia	Didelphidae	Caluromys	derbianus	Central American woolly opossum	240	240			3					330	8.7	1.194	342.7	308.15	0.208827	0.310721	0.480451
Mammalia	Didelphimorphia	Didelphidae	Caluromys	philander	Woolly opossum	304		24	100	4.5	2	166	0.2	11	350	8.9				0.211125	0.312336	0.476539
Mammalia	Didelphimorphia	Didelphidae	Chironectes	minimus	Water opossum (yapok)	304				4		365			700	3.1	2.793	940.5	308.15	0.25394	0.0343868	0.711673
Mammalia	Didelphimorphia	Didelphidae	Didelphis	aurita	Azara's opossum	170			100	6.2					850	4				0.259379	0.080113	0.660508
Mammalia	Didelphimorphia	Didelphidae	Didelphis	marsupialis	Southern opossum	178	240	12	94	6	2	200	0.2	96	1530	4.2	3.31	1244.3	308.15	0.284454	0.0562104	0.659335
Mammalia	Didelphimorphia	Didelphidae	Didelphis	virginiana	Virginia opossum	184	243	12	102	15	2	122	0.147	142.5	3000	6.6	5.299	2846.6	308.15	0.308462	0.117779	0.573759
Mammalia	Didelphimorphia	Didelphidae	Gracilinanus	agilis	Paraguayan slender mouse opossum					12					22	6.1				0.0948524	0.391596	0.513552
Mammalia	Didelphimorphia	Didelphidae	Lutreolina	crassicaudata	Thick-tailed opossum			14		8	2				370	2.9	2.265	812	308.95	0.226905	0.0572222	0.715873
Mammalia	Didelphimorphia	Didelphidae	Marmosa	murina	Murine mouse opossum			13	62	8.4			0.09		26	3.6				0.108425	0.263261	0.628314
Mammalia	Didelphimorphia	Didelphidae	Marmosa	robinsoni	Robinson's mouse opossum	279	365	14	68	10	1.5	134	0.1	11	75	5	0.547	122	307.15	0.150753	0.274204	0.575042
Mammalia	Didelphimorphia	Didelphidae	Marmosops	noctivagus	Rio Napo mouse opossum										21	4.5				0.0964448	0.326038	0.577517
Mammalia	Didelphimorphia	Didelphidae	Metachirus	nudicaudatus	Brown four-eyed opossum					5		365			440	3	1.144	336	308.15	0.234064	0.0545594	0.711376
Mammalia	Didelphimorphia	Didelphidae	Monodelphis	adusta	Cloudy short-tailed opossum										35	4.1				0.11985	0.274838	0.605312
Mammalia	Didelphimorphia	Didelphidae	Monodelphis	brevicaudata	Short bare-tailed opossum	180	180			7	1.5				90	3.9	0.366	91.5	306.85	0.161671	0.207595	0.630734
Mammalia	Didelphimorphia	Didelphidae	Monodelphis	domestica	Shorttailed opossum	122	122	15	53	9	4	53	0.1	20.3	105	5.1	0.335	104	305.75	0.165204	0.258697	0.576099
Mammalia	Didelphimorphia	Didelphidae	Philander	opossum	Gray four-eyed opossum	450			82	5	3	106	0.2	110	450	4.4	1.886	751	308.95	0.230484	0.139235	0.630281
Mammalia	Diprotodontia	Acrobatidae	Acrobates	pygmaeus	Pygmy gliding possum	240	365		99	3	2	114	0.0178	5.65	13	8.8	0.084	14	307.85	0.0675247	0.505092	0.427383
Mammalia	Diprotodontia	Burramyidae	Burramys	parvus	Mountain pygmy possum	320	320	15	60	3.5	1	365		22	45	12	0.205	44.3	309.25	0.11803	0.501102	0.380867
Mammalia	Diprotodontia	Burramyidae	Cercartetus	nanus	Dormouse possum	190	190		62	4	2	95	0.0198	8.4	40	10.3	0.311	64.8	308.75	0.114708	0.473782	0.41151
Mammalia	Diprotodontia	Macropodidae	Dendrolagus	dorianus	Doria's tree kangaroo				600	1					9581	19				0.346553	0.286366	0.367081
Mammalia	Diprotodontia	Macropodidae	Dendrolagus	goodfellowi	Goodfellow's tree kangaroo			45	360	1					7400	23.6				0.332696	0.350373	0.31693
Mammalia	Diprotodontia	Macropodidae	Dendrolagus	inustus	Grizzled tree kangaroo	510			540	1					11400	23.8				0.351458	0.32664	0.321902
Mammalia	Diprotodontia	Macropodidae	Dendrolagus	matschiei	Matschie's tree kangaroo	845		32	500	1		410			7200	26.9	7.96	6960	309.45	0.329942	0.38139	0.288668
Mammalia	Diprotodontia	Macropodidae	Dendrolagus	ursinus	Black tree kangaroo					1					8000	20				0.338071	0.30858	0.353349
Mammalia	Diprotodontia	Macropodidae	Dorcopsis	luctuosa	Gray dorcopsis	450				1		191			3570	13.9				0.307185	0.274725	0.41809
Mammalia	Diprotodontia	Macropodidae	Dorcopsis	muelleri	Brown dorcopsis				270	1					5000	12.4				0.323249	0.229103	0.447649
Mammalia	Diprotodontia	Macropodidae	Dorcopsulus	macleayi	Papuan mountain wallaby					1.2					2988	7.9				0.306146	0.158392	0.535462
Mammalia	Diprotodontia	Macropodidae	Lagorchestes	conspicillatus	Spectacled hare-wallaby	363		30	204	1		153			3000	8.8	4.749	2660	309.15	0.305036	0.182383	0.512581
Mammalia	Diprotodontia	Macropodidae	Lagorchestes	hirsutus	Rufous hare-wallaby	330			150	1		125		1000	1310	13.2				0.26404	0.322578	0.413382
Mammalia	Diprotodontia	Macropodidae	Macropus	agilis	Agile wallaby	365	425	29	214	1	1.8	220	0.634	2286.7	16000	16.9				0.370331	0.229651	0.400018
Mammalia	Diprotodontia	Macropodidae	Macropus	antilopinus	Antilopine wallaroo	802		34	426	1		270	0.703		49500	19.8				0.417742	0.198236	0.384022
Mammalia	Diprotodontia	Macropodidae	Macropus	bernardus	Black wallaroo					1					17500	11.8				0.378521	0.143668	0.477811
Mammalia	Diprotodontia	Macropodidae	Macropus	eugenii	Tammar wallaby	274	730	28	325	1	1	365	0.429	3000	6500	15.1	7.78	4796	309.65	0.332354	0.257782	0.409863
Mammalia	Diprotodontia	Macropodidae	Macropus	fuliginosus	Western gray kangaroo	670	880	30	540	1	1	385	0.93433	11000	28250	23.2			309.65	0.391373	0.267087	0.34154
Mammalia	Diprotodontia	Macropodidae	Macropus	giganteus	Eastern gray kangaroo	639	1290	36	319	1	1	342	0.89867	4000	49500	25			309.45	0.414964	0.250604	0.334431
Mammalia	Diprotodontia	Macropodidae	Macropus	parma	Parma wallaby	424	620	34	303	1	1.3	213	0.5067	754	4250	15.9				0.313194	0.294574	0.392232
Mammalia	Diprotodontia	Macropodidae	Macropus	robustus	Wallaroo	547	670	32	351	1		264	0.703	2500	30000	22	33.056	29647.9	309.25	0.394629	0.251596	0.353775
Mammalia	Diprotodontia	Macropodidae	Macropus	rufogriseus	Red-necked wallaby	395	608	29	187	1	1	273	0.598	1483.3	16200	15.2				0.372136	0.205106	0.422758
Mammalia	Diprotodontia	Macropodidae	Macropus	rufus	Red kangaroo	517	806	33	360	1		241	0.784	5000	55000	25	31.353	28500	309.05	0.419563	0.244356	0.336081
Mammalia	Diprotodontia	Macropodidae	Onychogalea	fraenata	Ridled nail-tailed wallaby	185		23	165	1		125		1900	5500	7.4				0.333557	0.107524	0.558919
Mammalia	Diprotodontia	Macropodidae	Onychogalea	unguifera	Northern nail-tailed wallaby					1					5800	5.5				0.339409	0.0377376	0.622854
Mammalia	Diprotodontia	Macropodidae	Petrogale	brachyotis	Western rock wallaby					1					3700	10.1				0.312549	0.200887	0.486564
Mammalia	Diprotodontia	Macropodidae	Petrogale	concinna	Nabarlek	430		30	175	1	1	171		300	1250	11.7				0.263431	0.298269	0.4383
Mammalia	Diprotodontia	Macropodidae	Petrogale	penicillata	Brush-tailed rock wallaby	540	590	30	273	1		200		735	6000	14.3				0.329509	0.250305	0.420186
Mammalia	Diprotodontia	Macropodidae	Petrogale	xanthopus	Ringtailed rock wallaby	541		31	344	1.1		196	0.5	2500	6000	14.4				0.329426	0.25187	0.418704
Mammalia	Diprotodontia	Macropodidae	Setonix	brachyurus	Quokka	252	389	26	190	1	1.4	365	0.404	500	3500	13.8	4.695	2702.3		0.306406	0.274278	0.419315
Mammalia	Diprotodontia	Macropodidae	Thylogale	billardierii	Tasmanian red-bellied pademelon	435	435	29	202	1	1	204	0.42	1029	5000	8.8				0.327333	0.152088	0.520579
Mammalia	Diprotodontia	Macropodidae	Thylogale	stigmatica	Red-legged pademelon	338		29	252	1		185			4100	9.7				0.317511	0.185725	0.496764
Mammalia	Diprotodontia	Macropodidae	Thylogale	thetis	Red-necked pademelon	555			210	1		182			3800	9				0.315086	0.17341	0.511503
Mammalia	Diprotodontia	Macropodidae	Wallabia	bicolor	Swamp wallaby	426	426	36	256	1	1.4	243	0.61		14625	16.8				0.36648	0.233647	0.399873
Mammalia	Diprotodontia	Petauridae	Dactylopsila	trivirgata	Striped possum					1.5		365			318	9.6				0.206038	0.335025	0.458937
Mammalia	Diprotodontia	Petauridae	Gymnobelideus	leadbeateri	Leadbeater's possum	475	464	16	115	1.5	2	183		34	127	14.1	0.574	166	308.15	0.161396	0.475787	0.362817
Mammalia	Diprotodontia	Petauridae	Petaurus	australis	Fluffy glider	725			152	1	1	364		285	572.5	15				0.226387	0.400377	0.373236
Mammalia	Diprotodontia	Petauridae	Petaurus	breviceps	Sugar glider	236	456	16	122	2	1.3	311	0.194	25	110	17.8	0.517	129.3	309.05	0.152348	0.536639	0.311012
Mammalia	Diprotodontia	Petauridae	Petaurus	norfolcensis	Squirrel glider			20	122	1.5		183			405	14.8				0.211439	0.41789	0.370671
Mammalia	Diprotodontia	Phalangeridae	Phalanger	gymnotis	Ground cuscus			13	270	1					2400	18.9			309.55	0.286192	0.367279	0.346528
Mammalia	Diprotodontia	Phalangeridae	Spilocuscus	maculatus	Spotted cuscus		243	13	240	2		365		1700	3500	17	6.27	4250	307.85	0.303923	0.321111	0.374967
Mammalia	Diprotodontia	Phalangeridae	Trichosurus	vulpecula	Brush-tailed possum	315	730	17	204	1	1.5	274	0.279	740	2395	15.9	3.8	1993.5	309.15	0.28816	0.328588	0.383252
Mammalia	Diprotodontia	Phascolarctidae	Phascolarctos	cinereus	Koala	646	1095	31	342	1	1	471	0.36	1155	9300	22.1	5.744	4732.4	308.95	0.343454	0.322073	0.334473
Mammalia	Diprotodontia	Potoroidae	Aepyprymnus	rufescens	Rufous 'rat'-kangaroo	333	380	23	162	1	3	115			3250	12.8	5.978	2820		0.304067	0.26178	0.434152
Mammalia	Diprotodontia	Potoroidae	Bettongia	penicillata	Woylie	180		18	150	1	3	102	0.29	500	1500	18.8	3.132	1018	310.35	0.26574	0.393962	0.340297
Mammalia	Diprotodontia	Potoroidae	Potorous	longipes	Long-footed potoroo	755		38	161	1		151		890	1650	15.3				0.272354	0.342048	0.385598
Mammalia	Diprotodontia	Potoroidae	Potorous	tridactylus	Potoroo	400		30	154	1	2	145	0.333	118	1430	14.5	2.556	1045.5	309.05	0.266747	0.338474	0.394778
Mammalia	Diprotodontia	Pseudocheiridae	Hemibelideus	lemuroides	Lemuroid ringtail possum					1		365			1040	5.4				0.264611	0.135543	0.599846
Mammalia	Diprotodontia	Pseudocheiridae	Pseudocheirus	peregrinus	Ring-tailed possum	365	365		180	2	1.5	200	0.3	400	850	10.1	2.27	859.3	310.55	0.248348	0.288118	0.463534
Mammalia	Diprotodontia	Vombatidae	Lasiorhinus	krefftii	Northern hairy-nosed wombat				365	1	1	548			31000	30				0.392366	0.319302	0.288332
Mammalia	Diprotodontia	Vombatidae	Lasiorhinus	latifrons	Hairy-nosed wombat	547	547	21	312	1		365	0.5	3633	25500	29.9	16.001	27348.2	308.45	0.383881	0.330136	0.285984
Mammalia	Diprotodontia	Vombatidae	Vombatus	ursinus	Coarse-haired wombat	730	730	27	350	1		730	0.5	5700	25500	30				0.383841	0.330885	0.285274
Mammalia	Erinaceomorpha	Erinaceidae	Atelerix	albiventris	African pygmy (four-toed) hedgehog	84		35	44	6	1		10		500	11.4	0.828	450	308.35	0.223745	0.346778	0.429477	0.0837353	0.14372	0.440074	0.33247
Mammalia	Erinaceomorpha	Erinaceidae	Erinaceus	amurensis	Manchurian hedgehog					6					800	8				0.248478	0.239368	0.512154
Mammalia	Erinaceomorpha	Erinaceidae	Erinaceus	concolor	Eastern European hedgehog	213		35		4.5	1.5		22		719	7	1.937	822.7	308.35	0.245409	0.215712	0.53888	0.133118	0.200524	0.375066	0.291292
Mammalia	Erinaceomorpha	Erinaceidae	Erinaceus	europaeus	Western European hedgehog	253	253	30	42	1.5	1.6		14.7	235	750	11.7	2.434	1213.5	307.15	0.241134	0.328564	0.430302	0.106084	0.228944	0.302609	0.362364
Mammalia	Erinaceomorpha	Erinaceidae	Hemiechinus	auritus	Long-eared desert hedgehog	213		39	36	4	1	365	10		342	7.6	0.845	398.5	306.95	0.211996	0.278247	0.509757	0.103008	0.24235	0.342939	0.311703
Mammalia	Erinaceomorpha	Erinaceidae	Paraechinus	aethiopicus	Desert hedgehog			37	50	3	1		8.5		188	6.3	0.63	451.5	307.35	0.188112	0.271605	0.540282
Mammalia	Erinaceomorpha	Erinaceidae	Paraechinus	hypomelas	Brandt's hedgehog				61	3.2	1				292	7				0.206077	0.269153	0.524771
Mammalia	Hyracoidea	Procaviidae	Dendrohyrax	arboreus	Tree hyrax	365	365	229	152	2			380		3000	13.6				0.299852	0.280142	0.420006	0.315886	0.265979	0.352051	0.0660846
Mammalia	Hyracoidea	Procaviidae	Procavia	capensis	Rock hyrax	500	500	215	116	3	1	365	205	500	3600	14.8	4.954	2458	310.15	0.306803	0.288318	0.404879	0.26035	0.263506	0.282952	0.193192
Mammalia	Lagomorpha	Leporidae	Lepus	brachyurus	Japanese hare			38		2.1	2.5				2519	13				0.292761	0.280373	0.426866
Mammalia	Lagomorpha	Leporidae	Lepus	californicus	Black-tailed jack rabbit	243		44	41	1	3.7		84.34	1300	4175	11.8	7.314	2300	312.35	0.315968	0.228659	0.455373	0.171786	0.137325	0.365967	0.324922
Mammalia	Lagomorpha	Leporidae	Lepus	europaeus	European hare	236		42	29	2	3.8		119.67	390	4175	10.7			311.45	0.317134	0.206684	0.476182	0.199095	0.141116	0.388487	0.271302
Mammalia	Lagomorpha	Leporidae	Lepus	timidus	Mountain hare	266		50	23	2	2.1	50	107.93	492	4175	18	8.443	3014.5	312.85	0.310939	0.323488	0.365572	0.198359	0.179072	0.332756	0.289812
Mammalia	Lagomorpha	Leporidae	Oryctolagus	cuniculus	Old World rabbit	730		30	26	5	4.3	29	45	214	1800	9	7.395	2167.9	312.15	0.282471	0.217725	0.499804	0.163383	0.278143	0.215572	0.342901
Mammalia	Lagomorpha	Leporidae	Sylvilagus	audubonii	Audubon's cottontail rabbit	164	107	29	28	3	5		34.5		900	7.8	2.506	686.9	311.45	0.253921	0.226697	0.519383	0.159339	0.177985	0.417885	0.244791
Mammalia	Lagomorpha	Leporidae	Sylvilagus	floridanus	Eastern cottontail	123		30	24	5	3.9	30	40	118.5	1150	9.8				0.261902	0.263419	0.474679	0.161114	0.147515	0.445727	0.245643
Mammalia	Lagomorpha	Leporidae	Sylvilagus	nuttallii	Nuttall's cottontail rabbit	121		30	34	3.6	3.5				760	7.4				0.247168	0.224902	0.52793
Mammalia	Lagomorpha	Leporidae	Sylvilagus	palustris	Marsh cottontail rabbit	219		34		2.3	6				1233	7.6				0.267971	0.202193	0.529836
Mammalia	Lagomorpha	Leporidae	Sylvilagus	transitionalis	New England cottontail rabbit	120		28	16	4.8	2.5		30		902.6	9.3				0.251952	0.266025	0.482023	0.14754	0.153129	0.443049	0.256282
Mammalia	Lagomorpha	Ochotonidae	Ochotona	hyperborea	Northern pika			28		3			9.6		120	9.4				0.16375	0.388094	0.448155
Mammalia	Lagomorpha	Ochotonidae	Ochotona	princeps	North American pika	347		30	28	3	2.2	30	9	81.1	100	7	0.932	109	313.25	0.159303	0.332704	0.507993	0.152973	0.387642	0.279578	0.179807
Mammalia	Macroscelidea	Macroscelididae	Elephantulus	intufi	Long-eared elephant shrew	335	183	52	38	1.6		67	10		52	9.3	0.29	46.5	310.35	0.127377	0.435287	0.437336	0.19482	0.46134	0.268257	0.0755826
Mammalia	Macroscelidea	Macroscelididae	Elephantulus	rozeti	North African elephant shrew			76		2.5	2				48	7.2	0.288	49	310.25	0.126931	0.382559	0.49051
Mammalia	Macroscelidea	Macroscelididae	Elephantulus	rufescens	Rufous elephant shrew	50	50	61	23	1	5.2	84	10.6	29	58	7.9	0.317	53	310.45	0.134086	0.392172	0.473742	0.177518	0.26239	0.537822	0.0222701
Mammalia	Macroscelidea	Macroscelididae	Macroscelides	proboscideus	Short-eared elephant shrew	44		65	19	1.6			7		40	8.7	0.292	39	309.35	0.116719	0.43587	0.447411	0.160477	0.273552	0.53444	0.0315313
Mammalia	Macroscelidea	Macroscelididae	Rhynchocyon	chrysopygus	Golden-rumped elephant shrew	38		42	15	1	4.5	81	80	180	540	11				0.22753	0.334192	0.438278	0.244822	0.131875	0.619457	0.00384556
Mammalia	Monotremata	Ornithorhynchidae	Ornithorhynchus	anatinus	Duck-billed platypus	548	548	17	106	2		365			1250	22.6	1.931	1030.3	307.15	0.25559	0.446117	0.298294
Mammalia	Monotremata	Tachyglossidae	Tachyglossus	aculeatus	Short-nosed echidna	548	548	22	200	1		730	0.379	400	3500	49.5	2.327	2909	303.85	0.291194	0.561121	0.147685
Mammalia	Monotremata	Tachyglossidae	Zaglossus	bruijni	Long-nosed echidna			10	152	1				400	7500	41.2	6.493	11848.6	303.95	0.326647	0.474705	0.198648
Mammalia	Peramelemorphia	Peramelidae	Echymipera	rufescens	Rufous spiny bandicoot					2.2					1250	3.1	2.255	886.6	308.05	0.279249	1.06544e-16	0.720751
Mammalia	Peramelemorphia	Peramelidae	Isoodon	auratus	Golden bandicoot			12		2.6					485	6.7	0.837	428	306.95	0.228745	0.229224	0.54203
Mammalia	Peramelemorphia	Peramelidae	Isoodon	macrourus	Brindled bandicoot	122	200	12	60	4	2.7	58	0.1883	100	1600	6.8	3.202	1551	309.05	0.280669	0.161763	0.557568
Mammalia	Peramelemorphia	Peramelidae	Isoodon	obesulus	Southern brown bandicoot	210		15	62	2.73	2.2	140	0.35	125	700	6.5	1.238	717	307.05	0.245122	0.200658	0.55422
Mammalia	Peramelemorphia	Peramelidae	Perameles	bougainville	Shark Bay Islands barred bandicoot	120		12		1.8				100	226	5.8				0.197133	0.242117	0.56075
Mammalia	Peramelemorphia	Peramelidae	Perameles	gunnii	Long-nosed bandicoot	91	152	12	60	2	3.8	65	0.25	136.7	766	6.1	1.902	695	308.35	0.249812	0.181051	0.569138
Mammalia	Peramelemorphia	Peramelidae	Perameles	nasuta	Greater long-nosed bandicoot	135		12	66	2.7		53	0.245	150	859	5.6	1.763	645	309.25	0.255832	0.155049	0.589119
Mammalia	Peramelemorphia	Peramelidae	Peroryctes	raffrayana	New Guinean bandicoot	90	150			3					675	3.2				0.251975	0.0436734	0.704352
Mammalia	Peramelemorphia	Thylacomyidae	Macrotis	lagotis	Rabbit-bandicoot or bilby	150		17	110	2	4	175			1300	9.6	2.4	1245.5	308.15	0.267499	0.251518	0.480984
Mammalia	Perissodactyla	Equidae	Equus	asinus	African wild ass	708	1005	359		1			30000		164998	47	164.92	177500		0.459998	0.320966	0.219036	0.515198	0.205394	0.323025	-0.0436167
Mammalia	Perissodactyla	Equidae	Equus	caballus	Horse	914	973	337	274	1	1	548	38000		300000	57			311.45	0.483796	0.32883	0.187374	0.512051	0.197244	0.283063	0.00764161
Mammalia	Perissodactyla	Equidae	Equus	grevyi	Grevy's zebra	1278	1461	406	259	1	0.5	575	40000		384000	31				0.501825	0.177413	0.320763	0.499708	0.174363	0.281884	0.0440454
Mammalia	Perissodactyla	Equidae	Equus	hemionus	Asiatic wild ass	1157	1187	339	456	1	0.7	458			230000	31.6				0.479223	0.212116	0.308661
Mammalia	Perissodactyla	Equidae	Equus	kiang	Kiang	730	730	299	360	1	0.5				275000	30.1				0.487602	0.190597	0.3218
Mammalia	Perissodactyla	Equidae	Equus	quagga	Plains zebra	900	900	365	395	1	0.6	556	32000	205000	280000	38				0.485613	0.241867	0.27252
Mammalia	Perissodactyla	Equidae	Equus	zebra	Mountain zebra	1009	1279	362	304	1	0.6	670	35000		296000	33.2				0.489647	0.208246	0.302107	0.499572	0.173695	0.304517	0.0222164
Mammalia	Perissodactyla	Rhinocerotidae	Ceratotherium	simum	White rhinoceros	1643	1643	515	365	1	0.4	1009	52500		2180000	45				0.57318	0.158123	0.268698	0.450182	0.0785576	0.230977	0.240283
Mammalia	Perissodactyla	Rhinocerotidae	Dicerorhinus	sumatrensis	Sumatran rhinoceros	2738		236	502	1	0.3	1278	23000		1260000	32.8				0.553017	0.119619	0.327364	0.406874	0.127733	0.156438	0.308955
Mammalia	Perissodactyla	Rhinocerotidae	Diceros	bicornis	Black rhinoceros	1826	2254	474	634	1	0.4	1059	36500		1100000	49			312.15	0.542309	0.217813	0.239878	0.453165	0.140206	0.198719	0.20791
Mammalia	Perissodactyla	Rhinocerotidae	Rhinoceros	sondaicus	Javan rhinoceros	1278		502	548	1	0.3				1750000	21				0.572666	1.06544e-16	0.427334
Mammalia	Perissodactyla	Rhinocerotidae	Rhinoceros	unicornis	Indian rhinoceros	1678	2557	479	456	1	0.3	850	58000	885812	1600000	43.5			310.55	0.560082	0.168854	0.271064	0.471996	0.108701	0.233906	0.185397
Mammalia	Perissodactyla	Tapiridae	Acrocodia	indica	Malayan tapir	1095	1095	392	183	1	0.5	730	6500		250000	36.5			309.95	0.481146	0.239544	0.27931
Mammalia	Perissodactyla	Tapiridae	Tapirus	bairdii	Baird's tapir	690	630	401	365	1	0.7		9400		300000	29.6				0.4916	0.181675	0.326725	0.386157	0.0834622	0.319414	0.210968
Mammalia	Perissodactyla	Tapiridae	Tapirus	pinchaque	Mountain tapir	1095	1460	398	365	1			4270		148950	28.5				0.461489	0.214695	0.323816	0.35611	0.158776	0.233374	0.25174
Mammalia	Perissodactyla	Tapiridae	Tapirus	terrestris	Brazilian tapir	1095	1095	398	289	1			6000	86260	250000	39.6			309.65	0.480175	0.25785	0.261975	0.364918	0.14466	0.221884	0.268538
Mammalia	Pilosa	Megalonychidae	Choloepus	didactylus	Linne's two-toed sloth	1279	1644	279	152	1	1	616	356		6250	36.8				0.320033	0.460155	0.219811	0.300113	0.377453	0.111614	0.21082
Mammalia	Pilosa	Megalonychidae	Choloepus	hoffmanni	Hoffmann's two-toed sloth	730	1095	350	21	1	0.7	456	402		6250	41	3.891	4005.2	307.55	0.318746	0.484425	0.196828	0.305773	0.328354	0.190891	0.174982
Mammalia	Pilosa	Myrmecophagidae	Myrmecophaga	tridactyla	Giant anteater	1186	1186	184	56	1	1.2		1600		28500	31	14.543	30600	305.65	0.388305	0.331653	0.280042	0.352123	0.280855	0.184028	0.182993
Mammalia	Pilosa	Myrmecophagidae	Tamandua	mexicana	Northern tamandua			163			1				4500	16	5.124	3884.2	305.15	0.315614	0.292592	0.391794
Mammalia	Pilosa	Myrmecophagidae	Tamandua	tetradactyla	Southern tamandua	365		160		1	1.4				4500	19	5.015	3500	306.65	0.313568	0.331184	0.355248
Mammalia	Primates	Callitrichidae	Callimico	goeldii	Goeldi's monkey	365	395	153	77	1	1.2	179	48.15	215	555	22.2			309.15	0.220363	0.490259	0.289378	0.228807	0.368881	0.248752	0.15356
Mammalia	Primates	Callitrichidae	Callithrix	argentata	Silvery marmoset	304	334	144	120	2	3.2	213	35.1		343.2	16.5				0.202917	0.452128	0.344956	0.219269	0.364964	0.283448	0.13232
Mammalia	Primates	Callitrichidae	Callithrix	geoffroyi	Geoffroy's marmoset										342	17.6				0.201995	0.466829	0.331176
Mammalia	Primates	Callitrichidae	Callithrix	humeralifera	Tassel-eared marmoset	304	334	144		2			34.5		355.8	15				0.205626	0.428586	0.365789	0.214959	0.355702	0.289481	0.139858
Mammalia	Primates	Callitrichidae	Callithrix	jacchus	White-tufted-ear marmoset	477	382	144	62	2	2	169	26.5	86.67	255.2	22.8	0.848	190	309.15	0.186133	0.542324	0.271543	0.217375	0.44275	0.190874	0.149001
Mammalia	Primates	Callitrichidae	Callithrix	kuhlii	Weid's black-tufted-ear marmoset										342	20				0.200473	0.495536	0.303991
Mammalia	Primates	Callitrichidae	Callithrix	penicillata	Black-pencilled marmoset					2					307	15.4				0.198873	0.443245	0.357882
Mammalia	Primates	Callitrichidae	Callithrix	pygmaea	Pygmy marmoset	684	638	125	91	2		171	16	70	124	18.6	0.599	110.7	308.35	0.157054	0.539407	0.303539	0.208776	0.51061	0.139594	0.14102
Mammalia	Primates	Callitrichidae	Leontopithecus	chrysomelas	Golden-headed lion tamarin					2					535	21.3				0.219254	0.483142	0.297605
Mammalia	Primates	Callitrichidae	Leontopithecus	chrysopygus	Golden-rumped lion tamarin										570	17.9				0.224091	0.440329	0.33558
Mammalia	Primates	Callitrichidae	Leontopithecus	rosalia	Golden lion tamarin	547	730	128	131	2	1.8	189	55.3	165	654.5	31.6				0.223356	0.559766	0.216878	0.240544	0.418539	0.17435	0.166568
Mammalia	Primates	Callitrichidae	Saguinus	bicolor	Brazilian bare-faced tamarin			160		1.63					495.8	19				0.217293	0.461993	0.320714
Mammalia	Primates	Callitrichidae	Saguinus	fuscicollis	Saddlebacked tamarin	546	730	147	91	1.8	1	202	39.9		456.5	24.9				0.210468	0.527621	0.261911	0.226884	0.424494	0.180224	0.168399
Mammalia	Primates	Callitrichidae	Saguinus	geoffroyi	Geoffroy's tamarin	548		142	56	2		241	46.03		499.3	20.5	1.305	225		0.216695	0.47864	0.304665	0.232062	0.410788	0.198034	0.159116
Mammalia	Primates	Callitrichidae	Saguinus	imperator	Emperor tamarin	546	730	145		2			47		518.5	23.7				0.216615	0.508976	0.274409	0.233941	0.416284	0.189146	0.160629
Mammalia	Primates	Callitrichidae	Saguinus	labiatus	Red-chested mustached tamarin			147	227	1.9	1.2	299	42.33		501.3	20.5				0.21687	0.478403	0.304727
Mammalia	Primates	Callitrichidae	Saguinus	leucopus	Silvery-brown bare-face tamarin			142		2			44		490	15.2				0.219437	0.41258	0.367983
Mammalia	Primates	Callitrichidae	Saguinus	midas	Midas tamarin	608		127	71	2	1.4	207	40		553.8	21				0.22093	0.477908	0.301162	0.216923	0.408191	0.177612	0.197274
Mammalia	Primates	Callitrichidae	Saguinus	mystax	Black-chested mustached tamarin	486	540	145	171	2		168	46.9		543.5	20				0.220692	0.468065	0.311244	0.228479	0.39114	0.216542	0.163839
Mammalia	Primates	Callitrichidae	Saguinus	nigricollis	Black-mantled tamarin	850		140	82	1.8	2.9	251	43.5	175	519.2	20.2				0.218577	0.473012	0.308412	0.228897	0.446562	0.138001	0.18654
Mammalia	Primates	Callitrichidae	Saguinus	oedipus	Cotton-top tamarin	548	550	178	52	1.9	1	244	39.36	105	445.5	26.2				0.208797	0.540496	0.250707	0.227567	0.429437	0.175742	0.167255
Mammalia	Primates	Cebidae	Alouatta	caraya	Black howler monkey	1167	928	187	195	1	1	338	187.5		5462.5	32.4				0.315672	0.439546	0.244783	0.251019	0.350574	0.111238	0.287169
Mammalia	Primates	Cebidae	Alouatta	palliata	Mantled howler monkey	1095	1278	186	433	1	0.6	384	409	1100	7000	24	11.464	4670	309.15	0.330071	0.357443	0.312486	0.299561	0.332831	0.166887	0.200722
Mammalia	Primates	Cebidae	Alouatta	seniculus	Red howler monkey	1475		190	372	1	0.7	424	263		6543.2	25				0.326639	0.370613	0.302748	0.269136	0.354113	0.109052	0.267699
Mammalia	Primates	Cebidae	Aotus	azarai	Azara's night monkey				234	1	1				1230	30				0.251513	0.510682	0.237806
Mammalia	Primates	Cebidae	Aotus	lemurinus	Lemurine night monkey			135	76	1	1	365	98		874	33.8				0.235178	0.557729	0.207093
Mammalia	Primates	Cebidae	Aotus	trivirgatus	Northern night monkey	821	730	142	77	1	1.4	269	88.5	360	800	30.1	2.499	914.5	311.15	0.232697	0.53694	0.230363	0.272724	0.453582	0.138813	0.134881
Mammalia	Primates	Cebidae	Aotus	vociferans	Noisy night monkey					1					873	22.1				0.240188	0.462381	0.297431
Mammalia	Primates	Cebidae	Ateles	belzebuth	White-bellied spider monkey	1461	1826	184		1	0.3	1095			7535	37				0.32813	0.450283	0.221586
Mammalia	Primates	Cebidae	Ateles	chamek	Chamek spider monkey										6000	42.8				0.316453	0.496495	0.187052
Mammalia	Primates	Cebidae	Ateles	fusciceps	Brown-headed spider monkey	1515	1826	227	410	1	0.5	882	400		7000	46				0.322323	0.503545	0.174132	0.308827	0.400798	0.0772006	0.213174
Mammalia	Primates	Cebidae	Ateles	geoffroyi	Central American spider monkey	1825	1826	232	821	1	0.3	970	426	2000	7267.5	47.1				0.323678	0.506628	0.169694	0.314089	0.418925	0.0525893	0.214397
Mammalia	Primates	Cebidae	Ateles	marginatus	White-whiskered spider monkey										6000	44				0.316124	0.502705	0.181172
Mammalia	Primates	Cebidae	Ateles	paniscus	Black spider monkey	1516	1280	229	795	1	0.5	1072	452.5	3790	7887.5	46				0.327533	0.496466	0.176001	0.313568	0.39479	0.0812427	0.210399
Mammalia	Primates	Cebidae	Brachyteles	arachnoides	Woolly spider monkey or muriqui	2738		232	662	1	0.3	730			11170	40				0.344385	0.444444	0.211171
Mammalia	Primates	Cebidae	Cebus	albifrons	White-fronted capuchin	1310	1310	158	274	1	0.7	547	233		2467.5	40.4				0.278356	0.536232	0.185412	0.308837	0.451203	0.0878026	0.152157
Mammalia	Primates	Cebidae	Cebus	apella	Brown capuchin	1703		158	307	1.5	0.6	671	239.7	1000	2642.5	46				0.279801	0.56132	0.158879	0.311832	0.478858	0.0443765	0.164934
Mammalia	Primates	Cebidae	Cebus	capucinus	White-faced capuchin	1505	2921	162	521	1	0.5	803	230	1350	2655	54				0.278097	0.597048	0.124855	0.309344	0.474457	0.0485	0.167699
Mammalia	Primates	Cebidae	Cebus	olivaceus	Weeping capuchin	2190		162	740	1	0.5	792			2552.5	47				0.278032	0.568205	0.153763
Mammalia	Primates	Cebidae	Lagothrix	lagotricha	Humboldt's woolly monkey	2555	1520	223	352	1	0.5	639	300		7650	32				0.33052	0.416782	0.252698	0.28045	0.411994	0.0222831	0.285273
Mammalia	Primates	Cebidae	Saimiri	boliviensis	Bolivian squirrel monkey			158		1					615	30.3				0.221139	0.554024	0.224837
Mammalia	Primates	Cebidae	Saimiri	sciureus	South American squirrel monkey	1003	1826	161	177	1	1	365	107	403	925	30.2	4.429	836.7	311.15	0.238995	0.529075	0.231931	0.283387	0.466947	0.11797	0.131695
Mammalia	Primates	Cercopithecidae	Allenopithecus	nigroviridis	Allen's swamp monkey				108	1			221		4702.5	27				0.311304	0.407487	0.281209
Mammalia	Primates	Cercopithecidae	Cercocebus	agilis	Agile mangabey										8000	31				0.332851	0.406999	0.26015
Mammalia	Primates	Cercopithecidae	Cercocebus	torquatus	Red-capped mangabey	973		167		1	0.9	457			9492.5	46				0.335618	0.485481	0.178901
Mammalia	Primates	Cercopithecidae	Cercopithecus	ascanius	Black-cheeked white-nosed monkey	1642		147	182	1	0.7	540	371		3705	31.2				0.299176	0.454094	0.24673	0.327077	0.438767	0.0909067	0.14325
Mammalia	Primates	Cercopithecidae	Cercopithecus	campbelli	Campbell's monkey	1095		180	365	1					3600	30				0.298388	0.446992	0.254621
Mammalia	Primates	Cercopithecidae	Cercopithecus	cephus	Moustached monkey	1460		172	365	1	0.4	821	340		3585	36				0.296034	0.488183	0.215783	0.322336	0.435621	0.0938629	0.14818
Mammalia	Primates	Cercopithecidae	Cercopithecus	diana	Diana monkey	1962			365	1	1	365	475		4550	35.1				0.30674	0.468361	0.224899	0.341049	0.4534	0.0670189	0.138533
Mammalia	Primates	Cercopithecidae	Cercopithecus	erythrogaster	Red-bellied monkey					1					3250	24				0.296581	0.402946	0.300473
Mammalia	Primates	Cercopithecidae	Cercopithecus	hamlyni	Owl-faced monkey										4425	28.6				0.307963	0.424022	0.268014
Mammalia	Primates	Cercopithecidae	Cercopithecus	lhoesti	L'hoest's monkey					1	0.8	485			4700	24.1				0.312634	0.382002	0.305365
Mammalia	Primates	Cercopithecidae	Cercopithecus	mitis	Blue monkey	1673	1673	132	315	1	0.5	515	366.4		9000	37.8	19.276	8648.7	310.65	0.33563	0.44455	0.219819	0.288384	0.373973	0.0744693	0.263173
Mammalia	Primates	Cercopithecidae	Cercopithecus	mona	Mona monkey					1			284		4500	30				0.308128	0.433758	0.258114
Mammalia	Primates	Cercopithecidae	Cercopithecus	neglectus	De Brazza's monkey	1611	2555	177	395	1	1	365	260	1640	5945	30.8				0.319969	0.423153	0.256878	0.275981	0.38258	0.0823076	0.259131
Mammalia	Primates	Cercopithecidae	Cercopithecus	nictitans	White-nosed guenon	1460		172		1	0.5	719	406		5465	31				0.316218	0.429599	0.254183	0.315831	0.396475	0.110145	0.177549
Mammalia	Primates	Cercopithecidae	Cercopithecus	petaurista	Lesser white-nosed monkey					1					3650	29				0.299394	0.43856	0.262046
Mammalia	Primates	Cercopithecidae	Cercopithecus	pogonias	Crowned guenon	1460		165		1	0.5	730	340		3580	27				0.299399	0.423661	0.276939	0.318624	0.419082	0.113846	0.148447
Mammalia	Primates	Cercopithecidae	Cercopithecus	preussi	Preuss's monkey					1					5250	26				0.316561	0.39248	0.29096
Mammalia	Primates	Cercopithecidae	Cercopithecus	wolfi	Wolf's monkey					1			435		3390	24				0.298422	0.400445	0.301133
Mammalia	Primates	Cercopithecidae	Chlorocebus	aethiops	Vervet	1034	1825	162	182	1	1	357	314	1036	5620	30.8			309.95	0.317515	0.426487	0.255998	0.290586	0.351647	0.148421	0.209346
Mammalia	Primates	Cercopithecidae	Colobus	angolensis	Angolan colobus					1					8625	35.3				0.334588	0.431708	0.233704
Mammalia	Primates	Cercopithecidae	Colobus	guereza	Guereza	1461	2192	175	377	1	1	365	397.8	1600	9950	35	17.037	10623.6	310.15	0.340927	0.421316	0.237757	0.28852	0.350694	0.100822	0.259964
Mammalia	Primates	Cercopithecidae	Colobus	polykomos	King colobus	1642	730	185	270	1	0.6	442	708.5	1240	9525	33.9				0.339402	0.416734	0.243864	0.338556	0.384039	0.106753	0.170652
Mammalia	Primates	Cercopithecidae	Erythrocebus	patas	Patas monkey	956	1400	167	162	1	1	357	504.5	1950	7750	28.3	5.958	3000	312.45	0.332551	0.388418	0.279032	0.313316	0.327874	0.180778	0.178031
Mammalia	Primates	Cercopithecidae	Lophocebus	albigena	Gray-cheeked mangabey	1460		181	233	1	0.4	584	425	2170	9317.5	36				0.337725	0.431538	0.230738	0.297317	0.360293	0.101198	0.241192
Mammalia	Primates	Cercopithecidae	Macaca	arctoides	Stump-tailed macaque	1186	2099	177	299	1	0.6	558	479	2300	9275	29.2				0.340018	0.384795	0.275186	0.302992	0.332866	0.147775	0.216367
Mammalia	Primates	Cercopithecidae	Macaca	assamensis	Assam macaque										9100	31.4				0.338322	0.402237	0.259441
Mammalia	Primates	Cercopithecidae	Macaca	fascicularis	Long-tailed macaque	1238	1544	165	242	1	0.9	431	320	848.4	6362.5	39			310.75	0.320121	0.472136	0.207743	0.291024	0.37241	0.108376	0.228189
Mammalia	Primates	Cercopithecidae	Macaca	fuscata	Japanese macaque	1483	1369	174	366	1.5	0.5	514	496	1767	8882.5	38.5				0.334838	0.44945	0.215711	0.313221	0.37525	0.0996404	0.211888
Mammalia	Primates	Cercopithecidae	Macaca	maura	Moor macaque	1825		165	507	1	0.6	669	389.5		5575	33				0.316343	0.442457	0.2412	0.314087	0.418263	0.074335	0.193315
Mammalia	Primates	Cercopithecidae	Macaca	mulatta	Rhesus monkey	1231	2007	165	292	1	1	444	464	1454	8235	40			310.45	0.331079	0.462523	0.206398	0.3102	0.363893	0.119847	0.20606
Mammalia	Primates	Cercopithecidae	Macaca	nemestrina	Pigtail macaque	1125	1095	172	324	1	0.8	405	462.5	1416.5	7912.5	37.6				0.330072	0.450997	0.218931	0.310226	0.355056	0.136177	0.198541
Mammalia	Primates	Cercopithecidae	Macaca	nigra	Celebes crested macaque	1490		176	365	1	0.7	540	461		7965	34				0.33156	0.428003	0.240437	0.310552	0.37543	0.105196	0.208821
Mammalia	Primates	Cercopithecidae	Macaca	ochreata	Booted macaque										3950	29				0.302841	0.433876	0.263283
Mammalia	Primates	Cercopithecidae	Macaca	radiata	Bonnet macaque	1295	1795	161	304	1	1	365	394	2000	6755	30				0.325858	0.409667	0.264474	0.302353	0.363601	0.127531	0.206515
Mammalia	Primates	Cercopithecidae	Macaca	silenus	Liontail macaque	1429	2511	176	365	1	0.7	503	407		7875	40				0.329128	0.465174	0.205698	0.302609	0.377467	0.0953452	0.224579
Mammalia	Primates	Cercopithecidae	Macaca	sinica	Toque macaque	1460		152	396	1	0.7	547	446		4370	29.3				0.307129	0.430194	0.262676	0.332992	0.415965	0.11727	0.133773
Mammalia	Primates	Cercopithecidae	Macaca	sylvanus	Barbary macaque	1399	2007	164	213	1.5	1	365	450	2420	10875	29.1				0.347006	0.374587	0.278408	0.291873	0.332433	0.123625	0.252069
Mammalia	Primates	Cercopithecidae	Macaca	thibetana	Tibetan macaque			170	571	1	0.5	730	525	2400	10300	27				0.345527	0.360988	0.293486
Mammalia	Primates	Cercopithecidae	Macaca	tonkeana	Tonkean macaque			173							11950	28.4				0.35141	0.363528	0.285062
Mammalia	Primates	Cercopithecidae	Mandrillus	leucophaeus	Drill	1277		179	487	1	0.8	448	772		18250	39				0.366115	0.409643	0.224242	0.315936	0.314499	0.133659	0.235905
Mammalia	Primates	Cercopithecidae	Mandrillus	sphinx	Mandrill	1186		173	354	1	0.8	532	613	3000	23000	40				0.375911	0.401609	0.22248	0.286175	0.280675	0.13405	0.299099
Mammalia	Primates	Cercopithecidae	Miopithecus	talapoin	Talapoin	1395	2008	169	130	1	1	1096	203.8	450	1384.5	27.7				0.257627	0.485752	0.256621	0.319607	0.480977	0.101147	0.098269
Mammalia	Primates	Cercopithecidae	Nasalis	larvatus	Proboscis monkey	1460		166	213	1.25	0.7	540	490	2000	14617.5	25.1				0.361676	0.32384	0.314484	0.283844	0.305193	0.130958	0.280005
Mammalia	Primates	Cercopithecidae	Papio	hamadryas	Hamadryas baboon	1514	1762	171	300	1	0.8	568	814	3950	18000	37.5	21.095	12670.8	311.15	0.36598	0.401653	0.232366	0.321755	0.331577	0.115232	0.231436
Mammalia	Primates	Cercopithecidae	Presbytis	melalophos	Mitred leaf monkey					1					6540	20				0.329275	0.320531	0.350194
Mammalia	Primates	Cercopithecidae	Pygathrix	nemaeus	Douc langur	1460		171	330	1	1	365	393.5		9720	26				0.343446	0.35595	0.300604	0.28478	0.335069	0.121201	0.25895
Mammalia	Primates	Cercopithecidae	Pygathrix	roxellana	Golden snub-nosed monkey										14750	29.5				0.360146	0.359577	0.280276
Mammalia	Primates	Cercopithecidae	Semnopithecus	entellus	Hanuman langur	1162	1886	192	342	1	0.7	514	500	2100	13516.5	29				0.356538	0.360918	0.282544	0.289163	0.299232	0.152381	0.259224
Mammalia	Primates	Cercopithecidae	Theropithecus	gelada	Gelada baboon	1391	2190	168	433	1	0.5	740	464	3900	16200	36				0.361868	0.398734	0.239398	0.279034	0.310587	0.110574	0.299805
Mammalia	Primates	Cercopithecidae	Trachypithecus	auratus	Javan langur										9720	31.1				0.341313	0.396173	0.262514
Mammalia	Primates	Cercopithecidae	Trachypithecus	cristatus	Silvered leaf monkey	1461			365	1					6185	28.3				0.322705	0.401795	0.2755
Mammalia	Primates	Cercopithecidae	Trachypithecus	francoisi	Francois' langur	1460			398				457		7325	26.3				0.330962	0.375303	0.293735	0.31011	0.365599	0.125496	0.198795
Mammalia	Primates	Cercopithecidae	Trachypithecus	johnii	Hooded leaf monkey					1					12000	34				0.349449	0.403696	0.246854
Mammalia	Primates	Cercopithecidae	Trachypithecus	obscurus	Dusky leaf monkey	1461		145	365	1	0.5		300		7080	33.9				0.326454	0.434327	0.239219	0.280319	0.368583	0.0936014	0.257497
Mammalia	Primates	Cercopithecidae	Trachypithecus	phayrei	Phayre's leaf monkey			167	309	1	0.8	456			8400	28.3				0.336066	0.383641	0.280293
Mammalia	Primates	Cercopithecidae	Trachypithecus	pileatus	Capped leaf monkey										11450	25.2				0.350968	0.339217	0.309815
Mammalia	Primates	Cercopithecidae	Trachypithecus	vetulus	Purple-faced leaf monkey	1278		211	250	1	0.4	784	432.33	1100	7081.8	26.1				0.329579	0.375592	0.29483	0.305922	0.353411	0.142103	0.198564
Mammalia	Primates	Cheirogaleidae	Cheirogaleus	major	Greater dwarf lemur	365	365	65	47	2.2			18.1		395	13.4				0.211531	0.397057	0.391412	0.157031	0.334979	0.250931	0.25706
Mammalia	Primates	Cheirogaleidae	Cheirogaleus	medius	Fat-tailed dwarf lemur	365		61	62	2.5	1	365	19		380	23.2	1.088	300	311.15	0.203304	0.522618	0.274078	0.169993	0.371835	0.214444	0.243728
Mammalia	Primates	Cheirogaleidae	Microcebus	coquereli	Coquerel's mouse lemur	312	275	89	136	1.8	1	365	14.8		311.2	17.4				0.198012	0.469859	0.332129	0.153476	0.348797	0.247191	0.250536
Mammalia	Primates	Cheirogaleidae	Microcebus	murinus	Gray mouse lemur	243	243	61	37	2	1	73	6		64.8	18.2				0.128986	0.573013	0.298001	0.149018	0.432445	0.247633	0.170903
Mammalia	Primates	Cheirogaleidae	Phaner	furcifer	Fork-marked lemur			174		1					400	25				0.204653	0.536357	0.25899
Mammalia	Primates	Daubentoniidae	Daubentonia	madagascariensis	Aye-aye	882		167	197	1	1	912	109	1535	2277.5	23.3				0.281413	0.417387	0.3012	0.23955	0.361837	0.153764	0.244849
Mammalia	Primates	Galagonidae	Galago	moholi	South African galago	300	300	123	93	2	2	182	10.6	95	175	16.6	0.285	170		0.173446	0.493429	0.333125	0.15121	0.380736	0.244612	0.223441
Mammalia	Primates	Galagonidae	Galago	senegalensis	Senegal galago	240	300	126	89	1.5	2	225	12.2	100	192.2	17.1	0.764	171.5	311.05	0.177185	0.494533	0.328282	0.157162	0.357862	0.277335	0.207642
Mammalia	Primates	Galagonidae	Galagoides	demidoff	Demidoff's galago	256	270	111	50	1.1	1	365	7.5		60	13.4	0.372	62.4		0.129273	0.508822	0.361905	0.167291	0.434218	0.269409	0.129082
Mammalia	Primates	Galagonidae	Otolemur	crassicaudatus	Greater galago	495	639	130	138	1.5	1	119	43.2	500	1094.5	22.7	2.595	993.5	309.75	0.249739	0.454987	0.295275	0.191707	0.336414	0.202373	0.269506
Mammalia	Primates	Galagonidae	Otolemur	garnettii	Small-eared galago	600	600	132	140	1	1.4	365	46		1300	18.3	3.927	1314	309.15	0.259815	0.396396	0.343789	0.18775	0.329569	0.193502	0.289179
Mammalia	Primates	Hominidae	Gorilla	gorilla	Gorilla	2829	4015	256	834	1	0.3	1397	2061.4	12595	139842	55.4			308.65	0.450819	0.367703	0.181478	0.315194	0.26809	0.0347978	0.381918
Mammalia	Primates	Hominidae	Homo	sapiens	Human	4745	5110	280	639	1	0.3	639	3312.5	11750	62035	122.5	82.78	70000	310.15	0.40589	0.59411	-2.22045e-16	0.405697	0.450907	-0.0738775	0.217273
Mammalia	Primates	Hominidae	Pan	paniscus	Pygmy chimpanzee or bonobo	3194		232	635	1	0.2	1825	1331	8500	39925	55				0.396191	0.440416	0.163393	0.336978	0.373078	0.00445362	0.285491
Mammalia	Primates	Hominidae	Pan	troglodytes	Chimpanzee	3376	2920	229	1111	1	0.2	840	1821	8500	44983.5	59.4			308.85	0.400482	0.450624	0.148894	0.358827	0.383434	0.00217552	0.255564
Mammalia	Primates	Hominidae	Pongo	pygmaeus	Orangutan	2555	2555	249	1003	1	0.2	1414	1736.5	11000	64475	59				0.416275	0.427758	0.155967	0.336269	0.323375	0.0385203	0.301835
Mammalia	Primates	Hylobatidae	Hylobates	agilis	Agile gibbon				724	1	0.3	1138			5925	49				0.314293	0.527621	0.158086
Mammalia	Primates	Hylobatidae	Hylobates	concolor	Crested gibbon	3080		207	724	1					6852.5	46.1				0.321367	0.505296	0.173337
Mammalia	Primates	Hylobatidae	Hylobates	hoolock	Hoolock gibbon	2556			709	1	0.3	1080			6875	41				0.322907	0.478773	0.198321
Mammalia	Primates	Hylobatidae	Hylobates	klossii	Kloss's gibbon			213	335	1	0.4				5900	37				0.317453	0.46479	0.217757
Mammalia	Primates	Hylobatidae	Hylobates	lar	White-handed gibbon	2555	1825	217	600	1	0.5	1095	307.2	1070	6810	56				0.318779	0.549352	0.131869	0.295035	0.455357	-0.0157688	0.265377
Mammalia	Primates	Hylobatidae	Hylobates	leucogenys	White-cheeked gibbon										6000	44.1				0.316096	0.503214	0.180689
Mammalia	Primates	Hylobatidae	Hylobates	moloch	Silvery gibbon			243	724	1	0.4	730			6207.5	45				0.31734	0.505735	0.176925
Mammalia	Primates	Hylobatidae	Hylobates	muelleri	Borneo gibbon			207		1		1080			5765	60				0.310686	0.574725	0.114589
Mammalia	Primates	Hylobatidae	Hylobates	pileatus	Pileated gibbon			228		1					5735	38				0.315898	0.472461	0.211641
Mammalia	Primates	Hylobatidae	Hylobates	syndactylus	Siamang	2190	2190	231	642	1	0.4	607	517		10900	43				0.342456	0.462136	0.195408	0.311861	0.402596	0.0407935	0.24475
Mammalia	Primates	Indridae	Propithecus	diadema	Diademed sifaka	1186	913	157	277	1	0.5	745	145		5550	21				0.32153	0.341222	0.337248	0.223557	0.316621	0.130523	0.329299
Mammalia	Primates	Indridae	Propithecus	tattersalli	Golden-crowned sifaka	1642			155				98		3545	20				0.302545	0.35685	0.340605	0.213577	0.370228	0.0769676	0.339227
Mammalia	Primates	Indridae	Propithecus	verreauxi	Verreaux's sifaka	912	912	148	150	1	1	537	72.25		5000	31	3.738	3350	309.15	0.312336	0.434873	0.252791	0.173739	0.297776	0.116554	0.411931
Mammalia	Primates	Lemuridae	Eulemur	coronatus	Crowned lemur	608		126		1.5	1		70		2500	27				0.283726	0.444957	0.271317	0.197833	0.311143	0.178718	0.312306
Mammalia	Primates	Lemuridae	Eulemur	fulvus	Brown lemur	608	548	118	153	1.1	2	537	83.3		3150	35.5	4.239	2374.1	309.65	0.290555	0.492714	0.216732	0.205254	0.312968	0.165522	0.316257
Mammalia	Primates	Lemuridae	Eulemur	macaco	Black lemur	548	548	127	152	1	1	365	74.67		2500	36.2				0.280234	0.510805	0.208961	0.206183	0.320442	0.174525	0.298851
Mammalia	Primates	Lemuridae	Eulemur	mongoz	Mongoose lemur	796		128	154	1.1	1	365	53		2060	36.2				0.271785	0.522286	0.20593	0.189684	0.361015	0.112714	0.336587
Mammalia	Primates	Lemuridae	Eulemur	rubriventer	Red-bellied lemur			130		1			85.5		1765.3	20				0.272112	0.398199	0.329689
Mammalia	Primates	Lemuridae	Hapalemur	griseus	Bamboo lemur	880		140	147	1.2	1.1	331	45.2		1347.5	23.3				0.258505	0.448512	0.292983	0.190865	0.376472	0.124521	0.308142
Mammalia	Primates	Lemuridae	Hapalemur	simus	Greater bamboo lemur			142		1					1737.5	17.6				0.272942	0.370433	0.356625
Mammalia	Primates	Lemuridae	Lemur	catta	Ring-tailed lemur	595	912	135	152	1.1	0.9	365	70.6		2555	37.3				0.280828	0.516237	0.202936	0.201618	0.326193	0.159466	0.312722
Mammalia	Primates	Lemuridae	Varecia	variegata	Ruffed lemur	604	608	99	112	2.2	1	365	87.2	2893	3670	37				0.296731	0.492946	0.210323	0.202572	0.303035	0.165048	0.329345
Mammalia	Primates	Loridae	Arctocebus	calabarensis	Calabar angwantibo	279	270	133	115	1	1.5	137	26.1	160	257.5	13	0.731	206	309.15	0.193216	0.415626	0.391158	0.204111	0.357576	0.301647	0.136666
Mammalia	Primates	Loridae	Loris	tardigradus	Slender loris	380	365	166	150	1.3	1.5	288	11	139	238.2	19.3	0.714	284	308.65	0.185109	0.508987	0.305904	0.144093	0.386544	0.203483	0.26588
Mammalia	Primates	Loridae	Nycticebus	coucang	Slow loris	578		188	177	1	1	492	48.2	520	890.5	25.8	1.504	1128.6	308.55	0.239211	0.495967	0.264823	0.213005	0.380455	0.176322	0.230219
Mammalia	Primates	Loridae	Nycticebus	pygmaeus	Pygmy loris	273		188	133	2		448	23		419	17.1				0.211202	0.448314	0.340484	0.174999	0.324561	0.281184	0.219257
Mammalia	Primates	Loridae	Perodicticus	potto	Potto	547	547	170	118	1	1	198	43.8		1225	26.8	1.942	968.6	309.25	0.252678	0.485593	0.261729	0.190691	0.346267	0.177823	0.285218
Mammalia	Primates	Pitheciidae	Cacajao	calvus	Red uakari	1204		182	639	1	0.5	776			3165	35.8				0.290662	0.494322	0.215017
Mammalia	Primates	Pitheciidae	Callicebus	cupreus	Coppery titi			132	206	1	0.9	395	74		1120	26.4				0.248946	0.48753	0.263524
Mammalia	Primates	Pitheciidae	Callicebus	donacophilus	Bolivian titi					1					795	25				0.234634	0.495621	0.269745
Mammalia	Primates	Pitheciidae	Callicebus	moloch	Dusky titi	912		163	244	1	1	365	86		804	26.2				0.234567	0.505482	0.259951	0.269144	0.454168	0.133323	0.143365
Mammalia	Primates	Pitheciidae	Chiropotes	albinasus	White-nosed bearded saki	1460		160		1					2910	20				0.293929	0.368556	0.337515
Mammalia	Primates	Pitheciidae	Chiropotes	satanas	Brown-bearded saki	1460		160		1					2942.5	19.6				0.294654	0.36336	0.341985
Mammalia	Primates	Pitheciidae	Pithecia	monachus	Monk saki					1			120.67		1780	25				0.269816	0.447818	0.282365
Mammalia	Primates	Pitheciidae	Pithecia	pithecia	Guianan saki	775	1460	158	122	1	1	319			1480	36				0.257417	0.540652	0.20193
Mammalia	Primates	Tarsiidae	Tarsius	bancanus	Western tarsier	920		178	80	1	1.5	270	24.6		122.5	16.3				0.158095	0.510486	0.331419	0.245371	0.547461	0.123314	0.083854
Mammalia	Primates	Tarsiidae	Tarsius	syrichta	Philippine tarsier			179	83	1			25.9		119.2	16	0.43	113	306.95	0.157124	0.507934	0.334942
Mammalia	Proboscidea	Elephantidae	Elephas	maximus	Asian elephant	3287	3287	644	548	1	0.2	1141	107000		3180000	65.5	2336.5	3670000	308.95	0.585189	0.220032	0.19478	0.502002	0.158591	0.135376	0.204031
Mammalia	Proboscidea	Elephantidae	Loxodonta	africana	African elephant	4018	3650	670	1071	1	0.2	1707	105000	600000	4800000	65			309.35	0.603252	0.193892	0.202856	0.483192	0.140808	0.108138	0.267862
Mammalia	Rodentia	Abrocomidae	Abrocoma	bennettii	Chinchilla-rat					3	2				265.5	2.3				0.215179	0.0248498	0.759971
Mammalia	Rodentia	Bathyergidae	Cryptomys	anselli	Ansell's mole-rat	365	365								90	20.6				0.14185	0.581348	0.276803
Mammalia	Rodentia	Bathyergidae	Cryptomys	damarensis	Damaraland mole-rat	511		93	83	2.5	1		9		180	15.5	0.418	131.3	308.35	0.175492	0.476361	0.348147	0.13975	0.419552	0.172098	0.2686
Mammalia	Rodentia	Bathyergidae	Cryptomys	hottentotus	African mole rat	450		81	46	2.86	1.5	132	8.63	26.1	132.5	11	0.35	78.9	307.55	0.166204	0.417516	0.41628	0.14471	0.412725	0.211692	0.230873
Mammalia	Rodentia	Bathyergidae	Cryptomys	mechowi	Giant mole-rat			112	65	2.6		112	19.6		250	16			307.15	0.189453	0.464009	0.346538
Mammalia	Rodentia	Bathyergidae	Georychus	capensis	Cape mole-rat	304	304	44	17	5	2		8.4	36	181	11.2	0.637	193	309.55	0.179604	0.403064	0.417332	0.125454	0.348134	0.26232	0.264092
Mammalia	Rodentia	Bathyergidae	Heterocephalus	glaber	Naked mole-rat	228		70	36	7	3.5	81	2	11	35	31	0.128	35.3	305.25	0.0957575	0.729141	0.175102	0.0929906	0.472325	0.182339	0.252345
Mammalia	Rodentia	Capromyidae	Capromys	pilorides	Cuban hutia	304	304	125	100	2			240		4683.3	13.8	3.375	2630	308.85	0.319119	0.257006	0.423876	0.25654	0.194456	0.360115	0.188889
Mammalia	Rodentia	Capromyidae	Geocapromys	brownii	Brown's hutia	365		123		2	2	168			1500	13.5	4.11	2456	309.15	0.269684	0.319592	0.410723
Mammalia	Rodentia	Capromyidae	Plagiodontia	aedium	Hispaniolan hutia			119		1			105.85		1267	15.9				0.260367	0.36635	0.373283
Mammalia	Rodentia	Castoridae	Castor	canadensis	American beaver	639	639	128	60	3.5	1	365	430		20250	23.4				0.376738	0.28876	0.334502	0.250837	0.189106	0.242702	0.317355
Mammalia	Rodentia	Caviidae	Cavia	aperea	Brazilian guinea pig	74	77	63	17	2.5	5		59.66	171.1	341	6				0.214684	0.225335	0.559981	0.238842	0.190297	0.561966	0.0088944
Mammalia	Rodentia	Caviidae	Cavia	porcellus	Guinea pig	66	76	68	18	3.8	5	96	85	228	728	12	2.13	639.1	312.15	0.239533	0.336016	0.424452	0.241737	0.165868	0.541013	0.0513822
Mammalia	Rodentia	Caviidae	Cavia	tschudii	Peruvian guinea pig	62		64		1.9	5				637.5	6.3				0.241412	0.199186	0.559402
Mammalia	Rodentia	Caviidae	Dolichotis	patagonum	Patagonian cavy	158	183	85	65	2	3.5	100	561.94		12500	14.4				0.361463	0.208341	0.430196	0.277414	0.0786311	0.473805	0.17015
Mammalia	Rodentia	Caviidae	Galea	musteloides	Common yellow-toothed cavy	66	60	54	39	2.63	7	53	37.99	136.8	337.9	3.5	1.473	322	310.45	0.220704	0.104835	0.674461	0.194098	0.13312	0.599623	0.0731589
Mammalia	Rodentia	Caviidae	Galea	spixii	Yellow-toothed cavy	70	112	53	42	2.5	6.5	53	40		450	4.6				0.229955	0.149217	0.620828	0.189378	0.131445	0.574393	0.104785
Mammalia	Rodentia	Caviidae	Hydrochoerus	hydrochaeris	Capybara	456	456	150	103	4.8	1.25	245	1500	8299	55000	15.1	36.754	26385	310.25	0.425568	0.131132	0.4433	0.299954	0.0882343	0.360486	0.251326
Mammalia	Rodentia	Caviidae	Kerodon	rupestris	Rock cavy	151		75	35	1.5	5	86	76		950	12.9	2.011	801	311.35	0.250289	0.336472	0.413239	0.227898	0.222173	0.420655	0.129274
Mammalia	Rodentia	Chinchillidae	Chinchilla	lanigera	Long-tailed chinchilla	240	240	111	54	2	2		35		642.5	17.2	1.31	436.7	307.85	0.229792	0.42427	0.345938	0.189222	0.290062	0.312198	0.208518
Mammalia	Rodentia	Chinchillidae	Lagidium	viscacia	Mountain viscacha			134		1.5			260		1540	19.5				0.266454	0.400611	0.332935
Mammalia	Rodentia	Chinchillidae	Lagostomus	maximus	Plains viscacha	258	456	154	54	2	1.8		200	652.2	6000	10.8	10.623	6794	309.95	0.332852	0.187266	0.479882	0.225751	0.136606	0.393061	0.244583
Mammalia	Rodentia	Ctenodactylidae	Ctenodactylus	gundi	Gundi	319		74		1.9	1	70	29.9		288.8	5.8				0.207835	0.227576	0.564589	0.200559	0.318434	0.344214	0.136793
Mammalia	Rodentia	Cuniculidae	Cuniculus	paca	Lowland paca	365	365	116	78	1	1.5	191	680		9000	16.3	15.323	9156	310.35	0.345648	0.255656	0.398696	0.316281	0.201216	0.358863	0.12364
Mammalia	Rodentia	Cuniculidae	Cuniculus	taczanowskii	Mountain paca					1	2				8999.9	18.9				0.343885	0.288892	0.367223
Mammalia	Rodentia	Dasyproctidae	Dasyprocta	azarae	Azara's agouti										2650	11.8	10.521	3849	310.65	0.296128	0.255617	0.448255
Mammalia	Rodentia	Dasyproctidae	Dasyprocta	cristata	Guyanan agouti					2					2650	14				0.294092	0.294009	0.4119
Mammalia	Rodentia	Dasyproctidae	Dasyprocta	fuliginosa	Sooty agouti										3500	18				0.303242	0.333947	0.362811
Mammalia	Rodentia	Dasyproctidae	Dasyprocta	leporina	Agouti	193		112		1					3265	17.8	8.694	2687	311.45	0.300341	0.33556	0.364099
Mammalia	Rodentia	Dasyproctidae	Dasyprocta	mexicana	Mexican agouti										2700	13.1				0.295699	0.277979	0.426323
Mammalia	Rodentia	Dasyproctidae	Dasyprocta	prymnolopha	Hairy-rumpted agouti					1.5					2900	16.3				0.296215	0.322821	0.380964
Mammalia	Rodentia	Dasyproctidae	Dasyprocta	punctata	Central American agouti	487		112		2		127	227		2150	13.8				0.285136	0.303178	0.411686	0.291045	0.305375	0.294892	0.108688
Mammalia	Rodentia	Dasyproctidae	Myoprocta	acouchy	Acouchi	304	304	99	53	2			100	350	775	14.8	2.804	914	308.55	0.239766	0.379402	0.380832	0.267079	0.324434	0.326109	0.0823782
Mammalia	Rodentia	Dinomyidae	Dinomys	branickii	Pacarana			253	15	2			900		12250	12.8				0.361984	0.183089	0.454927
Mammalia	Rodentia	Dipodidae	Allactaga	elater	Five-toed jerboa	142	142		33	4.5	2				58.7	5.2				0.13959	0.297545	0.562865
Mammalia	Rodentia	Dipodidae	Allactaga	euphratica	Euphrates jerboa					5					232	4.2				0.20212	0.168079	0.629801
Mammalia	Rodentia	Dipodidae	Allactaga	major	Great jerboa					4					350	7				0.213985	0.258408	0.527607
Mammalia	Rodentia	Dipodidae	Allactaga	sibirica	Siberian five-toed jerboa					3.4	1				117.5	4.5				0.171604	0.223918	0.604477
Mammalia	Rodentia	Dipodidae	Jaculus	jaculus	Lesser Egyptian jerboa	327	137	38	51	3	1.5	91	2	20	55	7.3	0.515	75	310.65	0.132709	0.377583	0.489708	0.0563141	0.383748	0.234116	0.325821
Mammalia	Rodentia	Dipodidae	Jaculus	orientalis	Greater Egyptian jerboa			35		2.5					134	5.5	0.775	139	310.15	0.17495	0.26119	0.56386
Mammalia	Rodentia	Dipodidae	Zapus	hudsonius	Meadow jumping mouse	61	61	19	28	5.5	2.1		0.8	7.8	18	5.6	0.219	26.1		0.0871119	0.384291	0.528597	0.0148649	0.272837	0.448121	0.264177
Mammalia	Rodentia	Echimyidae	Hoplomys	gymnurus	Armored rat			60		2.1			24.3		504	7				0.229901	0.236782	0.533317
Mammalia	Rodentia	Echimyidae	Proechimys	brevicauda	Andean spiny rat. Short-tailed spiny-rat										285	6.8				0.205363	0.264082	0.530555
Mammalia	Rodentia	Echimyidae	Proechimys	semispinosus	Spiny rat	146	146	64	21	2.4	4.68		23		500	5.8	1.75	498	311.05	0.231793	0.195024	0.573183	0.147841	0.186666	0.440584	0.22491
Mammalia	Rodentia	Echimyidae	Thrichomys	apereoides	Brazilian spiny rat	178		94	46	3.1	2.5	97	21.1		373.5	7	1.153	323	310.75	0.216821	0.254554	0.528625	0.158023	0.238893	0.39797	0.205113
Mammalia	Rodentia	Erethizontidae	Coendou	prehensilis	Prehensile-tailed porcupine	578	578	203	95	1		433	408		3900	26.6	5.123	3280	309.85	0.303314	0.415232	0.281454	0.322251	0.328471	0.24586	0.103417
Mammalia	Rodentia	Erethizontidae	Erethizon	dorsatus	North American porcupine	1095	1095	210	60	1	1		500	1000	8600	23.4	13.675	6871	309.15	0.339357	0.33955	0.321093	0.306424	0.320483	0.175373	0.197721
Mammalia	Rodentia	Erethizontidae	Sphiggurus	mexicanus	Mexican tree porcupine					1					2000	16.7				0.279708	0.350301	0.369991
Mammalia	Rodentia	Geomyidae	Geomys	bursarius	Plains pocket gopher	91	91	51	34	4	1		5.2	22.5	176.7	12	0.769	197	308.15	0.177733	0.419984	0.402283	0.0784338	0.22199	0.403898	0.295678
Mammalia	Rodentia	Geomyidae	Thomomys	bottae	Botta's pocket gopher	319	319	19	38	5.5	1		3.3		115.5	6.1	0.67	143	309.15	0.167232	0.293253	0.539515	0.0613019	0.323934	0.266654	0.34811
Mammalia	Rodentia	Heteromyidae	Chaetodipus	fallax	San Diego pocket mouse	166	166	25		3	1				18.7	8.3	0.15	19.6	305.75	0.0840909	0.470394	0.445515
Mammalia	Rodentia	Heteromyidae	Chaetodipus	formosus	Long-tailed pocket mouse	365	365	28	25	5	1		1	8	19	7.1	0.103	15.1		0.0866454	0.434381	0.478973	0.0480126	0.460905	0.198088	0.292994
Mammalia	Rodentia	Heteromyidae	Dipodomys	deserti	Desert kangaroo rat			30	20	3	3		3.04	38	116	8.6	0.517	105.8	309.95	0.16333	0.37013	0.46654
Mammalia	Rodentia	Heteromyidae	Dipodomys	heermanni	Heermann's kangaroo rat			31	31	3.1	2		3.91	28.1	65	8.3	0.408	63.3		0.138471	0.396507	0.465022
Mammalia	Rodentia	Heteromyidae	Dipodomys	merriami	Merriam's kangaroo rat	102		28	20	2.3	1.6	54	2.92	17.6	42	9.7	0.246	37.6	310.15	0.117553	0.45741	0.425037	0.094289	0.325446	0.384138	0.196127
Mammalia	Rodentia	Heteromyidae	Dipodomys	ordii	Ord's kangaroo rat	61		29	34	3	2	143	5		57	9.9	0.339	47.8	307.75	0.130639	0.443882	0.425478	0.120936	0.269683	0.470048	0.139333
Mammalia	Rodentia	Heteromyidae	Dipodomys	spectabilis	Banner-tailed kangaroo rat			23	24	2	2	42	7.75	30.3	145	12.7				0.168427	0.444442	0.387131
Mammalia	Rodentia	Heteromyidae	Perognathus	amplus	Arizona pocket mouse										11.7	5.9				0.0676872	0.421559	0.510754
Mammalia	Rodentia	Heteromyidae	Perognathus	longimembris	Little pocket mouse	151		22	28	5	1.25		0.9	4	8	8.3	0.061	8.5	307.85	0.0470295	0.52075	0.432221	0.0737293	0.457086	0.30278	0.166405
Mammalia	Rodentia	Heteromyidae	Perognathus	parvus	Great Basin pocket mouse	100		24	23	4.8	1.6		1.5		20.1	5.8	0.16	19.2		0.0915105	0.385627	0.522862	0.0659945	0.334588	0.400233	0.199185
Mammalia	Rodentia	Hystricidae	Atherurus	africanus	Brush-tailed porcupine			106		1.5	2.5		150		2750	22.9				0.289848	0.402318	0.307834
Mammalia	Rodentia	Hystricidae	Hystrix	africaeaustralis	Cape porcupine	375	390	94	77	2.1	1.7	379	351		24000	23.1	13.175	11300	310.65	0.384308	0.275786	0.339906	0.222021	0.115451	0.308543	0.353985
Mammalia	Rodentia	Hystricidae	Hystrix	brachyura	Old World porcupine			112		1.5			445		8000	27.3				0.334365	0.378456	0.287179
Mammalia	Rodentia	Hystricidae	Hystrix	cristata	African porcupine			66		2.3	2		1000		20000	28				0.374058	0.3298	0.296142
Mammalia	Rodentia	Hystricidae	Hystrix	indica	Indian crested porcupine			113		2		109			20000	27.1				0.374447	0.322463	0.303089
Mammalia	Rodentia	Muridae	Acomys	cahirinus	Spiny mouse	58	59	38	14	3	3.5	34	5.27	15.16	45.2	5.9	0.258	42	310.65	0.126679	0.341406	0.531915	0.128617	0.256917	0.514611	0.0998547
Mammalia	Rodentia	Muridae	Acomys	wilsoni	African spiny mouse			39		2.3	3.5		3.49	10	20	5.6				0.0917107	0.378043	0.530247
Mammalia	Rodentia	Muridae	Aethomys	namaquensis	Rock mouse				24	3.8	2		2.5	12.5	47.6	4.7	0.292	62.6	309.95	0.131645	0.287273	0.581082
Mammalia	Rodentia	Muridae	Apodemus	flavicollis	Yellow-necked mouse	52	52	26	22	5.5	2.8	39	2.4	8.7	29.4	4.5	0.365	28.3	309.85	0.111131	0.306083	0.582785	0.0789468	0.240669	0.52173	0.158655
Mammalia	Rodentia	Muridae	Apodemus	peninsulae	Korean field mouse					4.7			2		32.9	4.4				0.116309	0.294366	0.589325
Mammalia	Rodentia	Muridae	Apodemus	speciosus	Large Japanese field mouse					4.5					44	5.3				0.126782	0.318918	0.554301
Mammalia	Rodentia	Muridae	Apodemus	sylvaticus	Old World wood and field mouse	71	65	23	21	5.2	3.8	41	1.5		23.4	6.3	0.264	23.8	309.85	0.097161	0.395182	0.507657	0.0574716	0.293366	0.440608	0.208555
Mammalia	Rodentia	Muridae	Arvicanthis	niloticus	Nile kusu	45	45	22	23	5	3.5	38	4.15	21.7	110	6.7				0.163985	0.317215	0.5188	0.068188	0.154205	0.531758	0.24585
Mammalia	Rodentia	Muridae	Arvicola	terrestris	European water vole	51	45	21	14	5.1	3.2	32	5	42	120	2.5	0.613	94.7	310.65	0.179524	0.0906711	0.729805	0.0676315	0.108047	0.58963	0.234691
Mammalia	Rodentia	Muridae	Baiomys	taylori	Northern pygmy mouse	44	75	20	21	3	10	24	1.2	3.6	8	3.3	0.095	7.2	309.15	0.058014	0.313622	0.628364	0.0755997	0.29574	0.542683	0.0859773
Mammalia	Rodentia	Muridae	Calomyscus	bailwardi	Mouse-like hamster					3.3	1				20.4	9.4				0.0864066	0.493182	0.420411
Mammalia	Rodentia	Muridae	Cannomys	badius	Lesser bamboo rat			42	61	1.8			7		650	4.8	0.96	344	309.15	0.245499	0.136966	0.617535
Mammalia	Rodentia	Muridae	Chiropodomys	gliroides	Pencil-tailed tree mouse	101		20	24	2.2			2.8	10	29	3.6				0.113191	0.256785	0.630024	0.0945742	0.297874	0.452974	0.154578
Mammalia	Rodentia	Muridae	Clethrionomys	glareolus	Bank vole	47	72	20	20	4.3	3.2	21	1.82	9.8	20.8	4.9	0.312	21.5		0.0950129	0.34573	0.559257	0.0722024	0.256358	0.520184	0.151255
Mammalia	Rodentia	Muridae	Conilurus	penicillatus	Brush-tailed rabbit rat			35	31	2					144	4.5	0.908	213.2	309.05	0.180481	0.211857	0.607662
Mammalia	Rodentia	Muridae	Cricetomys	emini	Giant rat					1					1300	7.4				0.270598	0.193066	0.536335
Mammalia	Rodentia	Muridae	Cricetomys	gambianus	Gambian rat	158		34	31	3.5	3.75		25.7		1500	8.4	6.024	1686.7	308.75	0.275335	0.213044	0.511621	0.112547	0.123928	0.407745	0.35578
Mammalia	Rodentia	Muridae	Cricetus	cricetus	Black-bellied hamster	43	56	20	23	7	2	131	7	105	506.7	3.6	1.251	365.3	312.65	0.238054	0.0871324	0.674814	0.0333372	-0.00076782	0.598351	0.369079
Mammalia	Rodentia	Muridae	Dendromus	melanotis	Gray climbing mouse			25		4.6					7.4	4.2				0.0517389	0.372404	0.575858
Mammalia	Rodentia	Muridae	Dendromus	mesomelas	Brant's climbing mouse					4.4					13	3.3				0.0792058	0.284829	0.635965
Mammalia	Rodentia	Muridae	Desmodillus	auricularis	Cape short-eared gerbil			29	33	3.3			3.12		54.5	6.1	0.49	71.9	309.05	0.134449	0.337796	0.527755
Mammalia	Rodentia	Muridae	Dicrostonyx	groenlandicus	Collared lemming	40	85	20	16	3.4	8.5	26	4.35	23	66	3.3	0.459	56.8	311.55	0.150122	0.188474	0.661404	0.0850536	0.148037	0.598502	0.168407
Mammalia	Rodentia	Muridae	Gerbillus	campestris	North African gerbil										28.4	7.3				0.103859	0.416781	0.479359
Mammalia	Rodentia	Muridae	Gerbillus	gerbillus	Lesser Egyptian gerbil					4.1					30	5.9	0.237	29.7	310.35	0.108787	0.365715	0.525497
Mammalia	Rodentia	Muridae	Gerbillus	nanus	Baluchistan gerbil			22		5	3				18.5	4.5	0.129	29.7	311.95	0.0909123	0.333556	0.575532
Mammalia	Rodentia	Muridae	Gerbillus	perpallidus	Pale gerbil			20		4.5			2.24	17.2	50	5.5	0.261	56.3		0.13192	0.319655	0.548425
Mammalia	Rodentia	Muridae	Gerbillus	pyramidum	Greater Egyptian gerbil	74	73	21	21	3.3	5		2.5	11	37	8.2	0.454	108.5	309.25	0.114021	0.427202	0.458777	0.0825201	0.2906	0.43384	0.19304
Mammalia	Rodentia	Muridae	Grammomys	dolichurus	Woodland mouse	73		24	25	3		38	4.2		60	4.4				0.142536	0.258731	0.598733	0.0950133	0.229337	0.496298	0.179351
Mammalia	Rodentia	Muridae	Hydromys	chrysogaster	Golden-bellied water rat	163	135	36	30	3.8	2.1	60	24.39	150	850	7.3	2.97	900	309.75	0.252215	0.215209	0.532576	0.13245	0.166392	0.411642	0.289516
Mammalia	Rodentia	Muridae	Hypogeomys	antimena	Malagasy giant rat	730	365	120	35	1					1250	12.6				0.262548	0.314912	0.42254
Mammalia	Rodentia	Muridae	Lagurus	lagurus	Steppe lemming	38	44	20	21	4.5	5	25	1.35	5.8	20.3	3.8				0.0969787	0.29008	0.612942	0.043685	0.212947	0.556428	0.18694
Mammalia	Rodentia	Muridae	Lasiopodomys	brandtii	Brandt's vole	61				6	2.7		1.9		40	4.1	0.428	40.2		0.125679	0.266919	0.607402	0.0457474	0.215571	0.498761	0.23992
Mammalia	Rodentia	Muridae	Lemmus	lemmus	Norway lemming	24	44	19	15	7	2.5	26	3.8		70	3.3	1.071	80	310.95	0.152691	0.184984	0.662325	0.0672161	0.0892924	0.662767	0.180725
Mammalia	Rodentia	Muridae	Lemniscomys	barbarus	Barbary striped grass mouse					4.6					26.2	4.4				0.106369	0.307871	0.58576
Mammalia	Rodentia	Muridae	Lemniscomys	striatus	Typical striped grass mouse	168		25	30	4.54	2	22	1.7	15	42.3	4.8				0.126242	0.299002	0.574756	0.0441013	0.312893	0.347551	0.295455
Mammalia	Rodentia	Muridae	Leporillus	conditor	Greater stick-nest rat	227	240	38	36	2.2					332.5	5.3				0.215059	0.198974	0.585967
Mammalia	Rodentia	Muridae	Lophiomys	imhausi	Crested rat				40	1.75					755	7.5				0.24672	0.228308	0.524973
Mammalia	Rodentia	Muridae	Meriones	crassus	Sundevall's jird	61	82	22	20	4	2	67	3.35		35	5.6				0.116137	0.344854	0.539009	0.102627	0.265114	0.49623	0.136029
Mammalia	Rodentia	Muridae	Meriones	libycus	Libyan jird	91		26	30	5			5.33	45	100	5.2				0.162843	0.265951	0.571206	0.0953603	0.223983	0.462926	0.217731
Mammalia	Rodentia	Muridae	Meriones	meridianus	Mid-day jird			23	21	5.6	3				53	6.8				0.131937	0.363847	0.504217
Mammalia	Rodentia	Muridae	Meriones	persicus	Persian jird			26	19	4.3			5		100	6				0.161139	0.298087	0.540774
Mammalia	Rodentia	Muridae	Meriones	unguiculatus	Mongolian jird	43	36	25	24	5	4	46	3	14.3	53.2	6.3	0.546	64.8	311.35	0.133011	0.346472	0.520517	0.0732983	0.198157	0.531367	0.197178
Mammalia	Rodentia	Muridae	Meriones	vinogradovi	Vinogradov's jird			22		7			3		150	6.7				0.177523	0.298821	0.523656
Mammalia	Rodentia	Muridae	Mesembriomys	gouldii	Black-footed tree rat	71		44	47	2	4		34.9	440.5	900	7.8				0.253921	0.226697	0.519383	0.153688	0.0982674	0.531076	0.216969
Mammalia	Rodentia	Muridae	Mesembriomys	macrurus	Golden-backed tree rat			48	50	2					268.5	7.1				0.202245	0.277314	0.52044
Mammalia	Rodentia	Muridae	Mesocricetus	auratus	Golden hamster	48	48	16	20	9	3		2.45	22.93	105	3.9	0.69	108.2	311.25	0.168399	0.198453	0.633148	0.0202913	0.114634	0.542909	0.322166
Mammalia	Rodentia	Muridae	Mesocricetus	brandti	Brandt's hamster	41		15	19	8	3				174	4.4				0.189009	0.195587	0.615404
Mammalia	Rodentia	Muridae	Micromys	minutus	Old World harvest mouse	40	37	20	18	5.2	2.6	21	0.9		6	3.8	0.201	7.6	311.15	0.0437768	0.362366	0.593858	0.0660727	0.309754	0.536091	0.0880827
Mammalia	Rodentia	Muridae	Microtus	agrestis	Field vole	36	42	21	13	4.4	3.6	20	2.3	8.9	46	4.8	0.367	25	310.75	0.129902	0.294029	0.576069	0.0530468	0.168756	0.565276	0.212921
Mammalia	Rodentia	Muridae	Microtus	arvalis	Common vole	38	56	21	20	5.1	5.5	20	1.85	8.9	27.5	4.8	0.343	21.9	310.15	0.107447	0.324539	0.568014	0.058914	0.211087	0.550755	0.179244
Mammalia	Rodentia	Muridae	Microtus	guentheri	Vole	60	95	21	18	6	3.3	29	3	15	51.6	3.9	0.447	43.8	311.45	0.137389	0.240586	0.622024	0.071018	0.204926	0.519798	0.204258
Mammalia	Rodentia	Muridae	Microtus	ochrogaster	Prairie vole	47		23	20	3.8	4	26	3.02	16.7	40	5.3	0.41	48.2	311.05	0.122621	0.32457	0.552808	0.0852371	0.221717	0.531666	0.161379
Mammalia	Rodentia	Muridae	Microtus	pinetorum	Woodland vole	98		21	21	3	2.7	26	2.32	9.6	25.5	3.8	0.305	24.8	311.45	0.106933	0.276554	0.616512	0.0853985	0.302728	0.446972	0.164902
Mammalia	Rodentia	Muridae	Millardia	gleadowi	Sand-colored rat					2.3					70	4				0.1504	0.228185	0.621415
Mammalia	Rodentia	Muridae	Mus	minutoides	Mouse	60	77	20	21	4.3	4	31	0.97	3.3	7.2	4.3	0.129	8	309.45	0.0502628	0.379313	0.570425	0.068778	0.342469	0.47536	0.113393
Mammalia	Rodentia	Muridae	Mus	musculus	House mouse	42	42	19	22	7	5.4	30	1.25	8.9	20.5	4	0.271	18	310.05	0.0967957	0.301017	0.602187	0.0383617	0.221946	0.536786	0.202906
Mammalia	Rodentia	Muridae	Mystromys	albicaudatus	White-tailed mouse	109		38	32	3		36	6.5	40	106	6.3	0.707	93.8	306.15	0.163101	0.305588	0.531311	0.113003	0.254248	0.43195	0.200799
Mammalia	Rodentia	Muridae	Nannospalax	ehrenbergi	Palestine mole rat					3	1				160	20.2	0.585	133.8	308.7	0.167197	0.542822	0.289981
Mammalia	Rodentia	Muridae	Neotoma	albigula	White-throated woodrat	84	101	29	43	2	2	49	11.5	103.3	209	9.5	0.735	177.6	309.15	0.187843	0.357565	0.454592	0.132493	0.213988	0.457611	0.195908
Mammalia	Rodentia	Muridae	Neotoma	floridana	Eastern woodrat	95		33	22	3.5	2.5	83	13.43	45.9	291	8.6				0.203475	0.315584	0.480941	0.129897	0.196623	0.453106	0.220373
Mammalia	Rodentia	Muridae	Neotoma	lepida	Desert woodrat	76	76	33	31	3	3	60	8.45	35	236	10.5	0.46	112.5	309.95	0.191954	0.372835	0.435211	0.102108	0.188835	0.453741	0.255316
Mammalia	Rodentia	Muridae	Notomys	alexis	Australian hopping mouse	75	75	35	30	3.9		33	2.83	12.5	35	6.4	0.252	32.3	311.15	0.114547	0.374841	0.510612	0.0921122	0.286712	0.453434	0.167742
Mammalia	Rodentia	Muridae	Notomys	mitchellii	Mitchell's hopping mouse	73	90	37	30	3.3		37			52	5.3				0.134073	0.30901	0.556916
Mammalia	Rodentia	Muridae	Nyctomys	sumichrasti	Vesper rat			30	21	2.25	5	38	4.7	40	50	5.7				0.131495	0.327676	0.540829
Mammalia	Rodentia	Muridae	Ochrotomys	nuttalli	Golden mouse			30	21	2.7		25	2.7	12.5	22	8.4	0.151	19.5	309.55	0.091042	0.463445	0.445513
Mammalia	Rodentia	Muridae	Onychomys	leucogaster	Northern grasshopper mouse	100	114	31	23	4	2.5	32	2.6	13.1	32.5	5.6				0.112903	0.349249	0.537848	0.0890123	0.309993	0.421106	0.179888
Mammalia	Rodentia	Muridae	Onychomys	torridus	Southern grasshopper mouse	41	41	30	20	3.7	2.7	30	2.6	9.2	22	4.6	0.165	19.1	309.15	0.0982136	0.328215	0.573571	0.0971309	0.247239	0.554978	0.100652
Mammalia	Rodentia	Muridae	Pachyuromys	duprasi	Fat-tailed gerbil		61	20	29	4.5					40	8.3				0.11728	0.4253	0.45742
Mammalia	Rodentia	Muridae	Peromyscus	californicus	California mouse	46		30	30	2	4.6	24	4.46	18.6	42	5.5	0.267	47	309.55	0.12431	0.329995	0.545695	0.115457	0.231214	0.545114	0.108216
Mammalia	Rodentia	Muridae	Peromyscus	crinitus	Canyon mouse	70	70	24	28	3	2.05	27	2.2	14.1	16.5	7.7	0.162	20.5	308.85	0.0795213	0.460966	0.459512	0.107421	0.347457	0.441545	0.103576
Mammalia	Rodentia	Muridae	Peromyscus	eremicus	Cactus mouse	129		26	25	2.6	3.5	39	2.33		25	7.4	0.173	21	309.75	0.0981313	0.427399	0.474469	0.097568	0.369502	0.363792	0.169138
Mammalia	Rodentia	Muridae	Peromyscus	guatemalensis	Guatemalan deer mouse					1.9					40	5.7				0.121755	0.34091	0.537335
Mammalia	Rodentia	Muridae	Peromyscus	leucopus	White-footed mouse	73		26	22	4.5	3.7	26	1.89	9.24	23	7.9	0.213	22.3	309.85	0.0937132	0.447027	0.45926	0.080484	0.318727	0.428931	0.171858
Mammalia	Rodentia	Muridae	Peromyscus	maniculatus	Deer mouse	49		24	22	5	3	27	2	9.2	20.5	8.3	0.219	20.5	309.75	0.0881023	0.464944	0.446954	0.0878782	0.295434	0.48114	0.135548
Mammalia	Rodentia	Muridae	Peromyscus	polionotus	Oldfield mouse	28		24	21	3.8	3	25	1.68	6.72	14	5.5	0.12	12		0.0763569	0.395149	0.528494	0.0810304	0.245137	0.579327	0.0945055
Mammalia	Rodentia	Muridae	Peromyscus	truei	Pinyon mouse	50		26	30	3.4	5	40	2.315	10.5	25	5.4	0.307	33.1	309.85	0.101884	0.356642	0.541474	0.0854268	0.260323	0.513166	0.141085
Mammalia	Rodentia	Muridae	Phloeomys	cumingi	Slender-tailed cloud rat					1					1750	13.6				0.276325	0.312108	0.411567
Mammalia	Rodentia	Muridae	Phloeomys	pallidus	Northern Luzon slender-tailed cloud rat										1744	10.7				0.279031	0.258454	0.462515
Mammalia	Rodentia	Muridae	Phodopus	roborovskii	Desert hamster	243	90	21	19	6	3.5		1.45	18.1	18	4.8				0.0889477	0.349674	0.561379	0.072733	0.417021	0.292623	0.217623
Mammalia	Rodentia	Muridae	Phodopus	sungorus	Dzhungarian hamster	120		20	21	5.5	3.5	40	2	14.8	23.4	3.9	0.313	31.3	309.25	0.102872	0.287485	0.609643	0.0790146	0.325897	0.412897	0.182192
Mammalia	Rodentia	Muridae	Podomys	floridanus	Florida mouse			23	25	2.5		33	2.4	12.5	32	7.4	0.288	30.8		0.108906	0.412759	0.478335
Mammalia	Rodentia	Muridae	Pogonomys	macrourus	Long-tailed tree mouse					2.4					57	3.1				0.144468	0.183128	0.672404
Mammalia	Rodentia	Muridae	Praomys	tullbergi	Tullberg's rock rat	82	75	24	25	3.5	4	24	2.7	10.5	30	5.2				0.110291	0.337354	0.552355	0.0932211	0.294999	0.454279	0.157501
[truncated: 107 more rows]
